# Supplementary material for: Synthesis of [CNN] pincer nickel(ii) NHC chlorides and their catalytic effects on the hydrosilylation of aldehydes and ketones under mild conditions
Source: Royal Society of Chemistry journal article supplement (doi:10.1039/d3nj01375h), 2023-01-01
Supplement: d3nj01375h1.pdf [file d3nj01375h1.pdf]

## Supporting Information

### Synthesis of [CNN] Pincer Nickel(II) NHC Chlorides and Their Catalytic Effects on Hydrosilylation of Aldehydes and Ketones under Mild Conditions

Shaobo Cao,<sup>a</sup> Shangqing Xie,<sup>a</sup> Qingshuang Li,<sup>a</sup> Xiaoyan Li,<sup>a</sup> Hongjian Sun,<sup>a,\*</sup>  
Olaf Fuhr<sup>b</sup> and Dieter Fenske<sup>b</sup>

<sup>a</sup> School of Chemistry and Chemical Engineering, Key Laboratory of Special Functional Aggregated Materials, Ministry of Education, Shandong University, Shanda Nanlu 27, 250100 Jinan, People's Republic of China

<sup>b</sup> Institut für Nanotechnologie (INT) und Karlsruher Nano-Micro-Facility (KNMF), Karlsruher Institut für Technologie (KIT), Hermann-von-Helmholtz-Platz 1, 76344 Eggenstein-Leopoldshafen, Germany

Correspondence author: hjsun@sdu.edu.cn

## Contents

### CONTENTS:

|                                                                                                                  |     |
|------------------------------------------------------------------------------------------------------------------|-----|
| SI Crystallographic Data for complexes <b>3a</b> , <b>3b</b> and <b>5a</b>                                       | S2  |
| SII <sup>1</sup> H, <sup>13</sup> C NMR spectra of complex <b>1</b>                                              | S3  |
| SIII IR, <sup>1</sup> H, <sup>13</sup> C NMR spectra of complexes <b>2a</b> - <b>2c</b>                          | S4  |
| SIV IR, <sup>1</sup> H, <sup>13</sup> C NMR spectra of complexes <b>3a</b> - <b>3c</b> and <b>5a</b> - <b>5b</b> | S9  |
| SV <sup>1</sup> H NMR spectra and GC Spectrum of the alcohol products                                            | S20 |
| SVI GC analysis of H <sub>2</sub>                                                                                | S51 |

SI Crystallographic Data for Complexes **3a**, **3b** and **5a**

| complex                               | <b>3a</b>                                           | <b>3b</b>                                                                                               | <b>5a</b>                                                                               |
|---------------------------------------|-----------------------------------------------------|---------------------------------------------------------------------------------------------------------|-----------------------------------------------------------------------------------------|
| formula                               | C <sub>22</sub> H <sub>21</sub> ClN <sub>4</sub> Ni | C <sub>19</sub> H <sub>15</sub> Br <sub>0.07</sub> Cl <sub>0.95</sub> N <sub>4</sub> Ni <sub>0.96</sub> | C <sub>23</sub> H <sub>27</sub> Br <sub>0.11</sub> Cl <sub>0.89</sub> N <sub>4</sub> Ni |
| $M_z$                                 | 435.59                                              | 395.32                                                                                                  | 458.42                                                                                  |
| crystal system                        | orthorhombic                                        | monoclinic                                                                                              | orthorhombic                                                                            |
| space group                           | Pca2 <sub>1</sub>                                   | P21/c                                                                                                   | P2 <sub>1</sub> 2 <sub>1</sub> 2 <sub>1</sub>                                           |
| a [Å]                                 | 22.2059(5)                                          | 7.8582(3)                                                                                               | 8.3434(2)                                                                               |
| b [Å]                                 | 10.1482(2)                                          | 24.1174(12)                                                                                             | 14.2256(4)                                                                              |
| c [Å]                                 | 8.5616(2)                                           | 17.5914(6)                                                                                              | 17.7157(4)                                                                              |
| $\alpha$ [°]                          | 90                                                  | 90                                                                                                      | 90                                                                                      |
| $\beta$ [°]                           | 90                                                  | 95.976(3)                                                                                               | 90                                                                                      |
| $\gamma$ [°]                          | 90                                                  | 90                                                                                                      | 90                                                                                      |
| V [Å <sup>3</sup> ]                   | 1929.36(7)                                          | 3315.8(2)                                                                                               | 2102.67(9)                                                                              |
| T [K]                                 | 150.15                                              | 150.15                                                                                                  | 173.15                                                                                  |
| Z                                     | 4                                                   | 8                                                                                                       | 4                                                                                       |
| $\mu$ [mm <sup>-1</sup> ]             | 6.518                                               | 7.273                                                                                                   | 2.735                                                                                   |
| total reflns                          | 10895                                               | 16325                                                                                                   | 7023                                                                                    |
| unique reflns                         | 4120                                                | 6666                                                                                                    | 3670                                                                                    |
| R <sub>int</sub>                      | 0.0128                                              | 0.0268                                                                                                  | 0.0576                                                                                  |
| R <sub>1</sub> [I>2 $\sigma$ (I)]     | 0.0224                                              | 0.0546                                                                                                  | 0.0401                                                                                  |
| wR(F <sup>2</sup> )[I>2 $\sigma$ (I)] | 0.0600                                              | 0.1474                                                                                                  | 0.0928                                                                                  |
| R <sub>1</sub> (all data)             | 0.0231                                              | 0.0630                                                                                                  | 0.0486                                                                                  |
| wR(F <sup>2</sup> )(all data)         | 0.0604                                              | 0.1544                                                                                                  | 0.0971                                                                                  |
| GOF on F <sup>2</sup>                 | 1.038                                               | 1.062                                                                                                   | 0.987                                                                                   |

SII  $^1\text{H}$ ,  $^{13}\text{C}$  NMR spectra of complex **1**

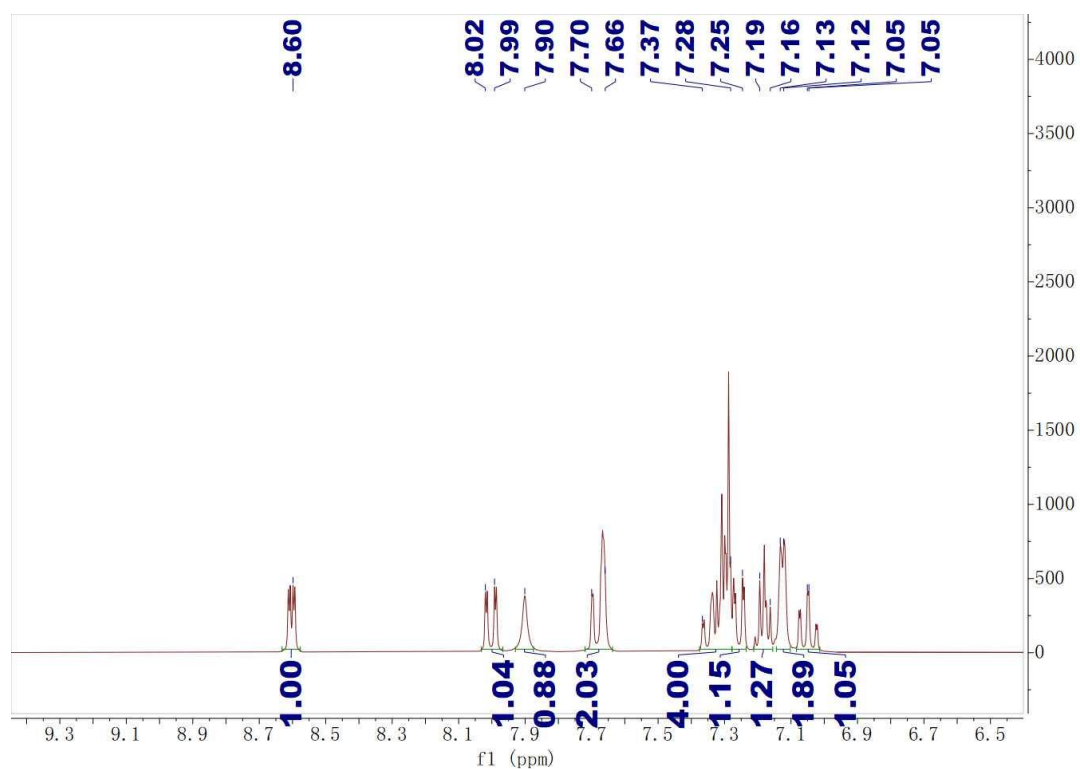

Fig.S2  $^1\text{H}$  NMR spectrum of complex **1** ( $\text{CDCl}_3$ )

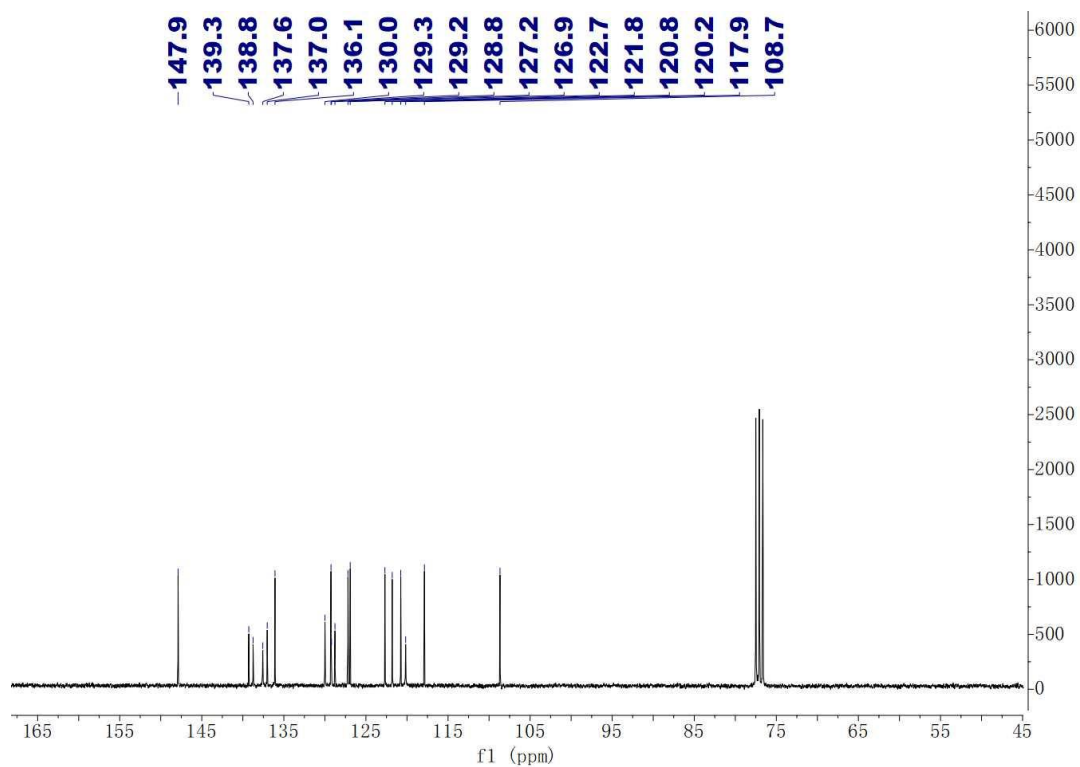

Fig.S3  $^{13}\text{C}$  NMR spectrum of complex **1** ( $\text{CDCl}_3$ )

SIII IR,  $^1\text{H}$ ,  $^{13}\text{C}$ NMR spectra of complexes **2a** - **2c**

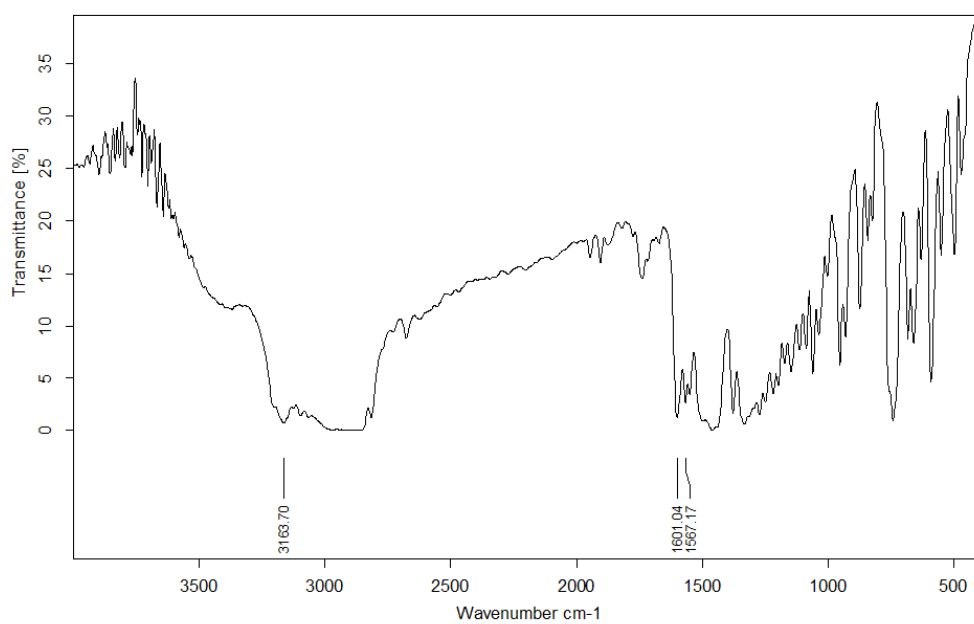

Fig.S4 IR spectrum of complex **2a**

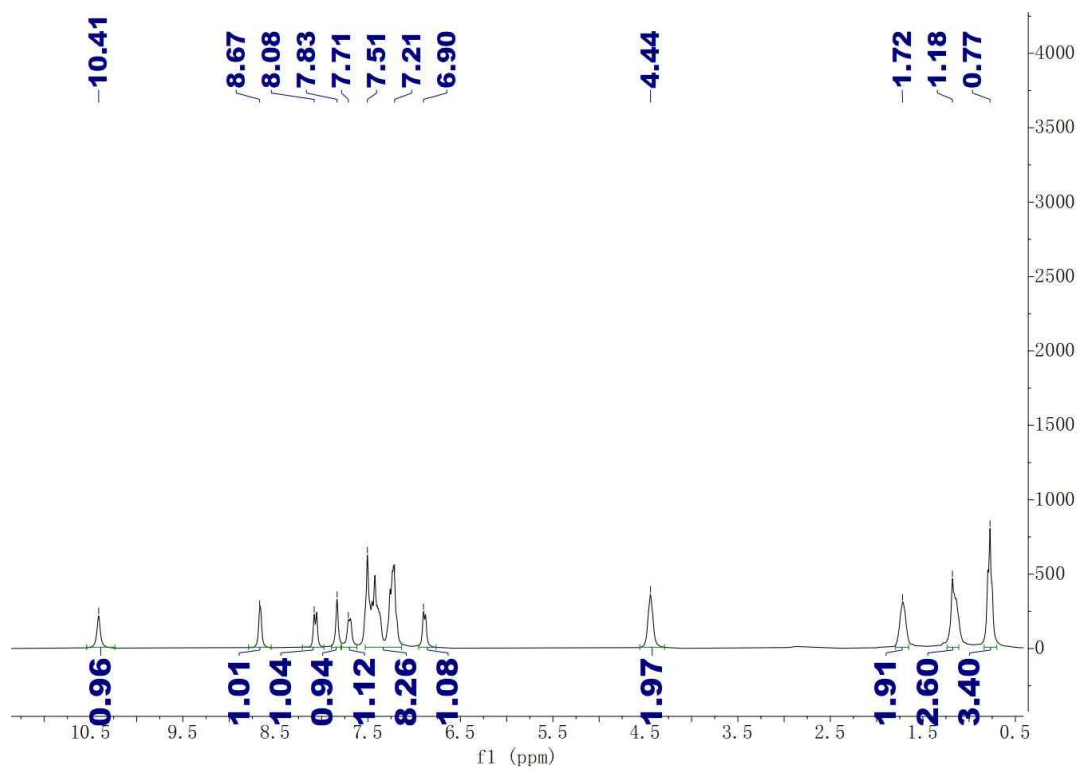

Fig.S5  $^1\text{H}$  NMR spectrum of complex **2a** ( $\text{CDCl}_3$ )

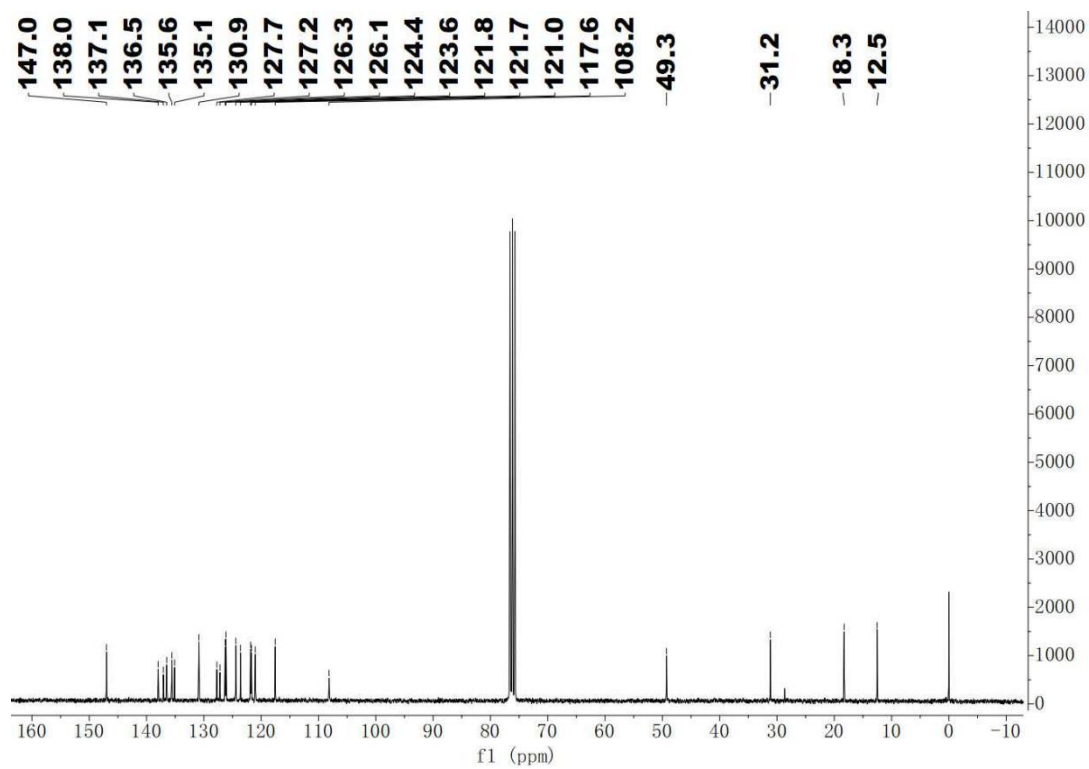

Fig.S6  $^{13}\text{C}$  NMR spectrum of complex **2a** ( $\text{CDCl}_3$ )

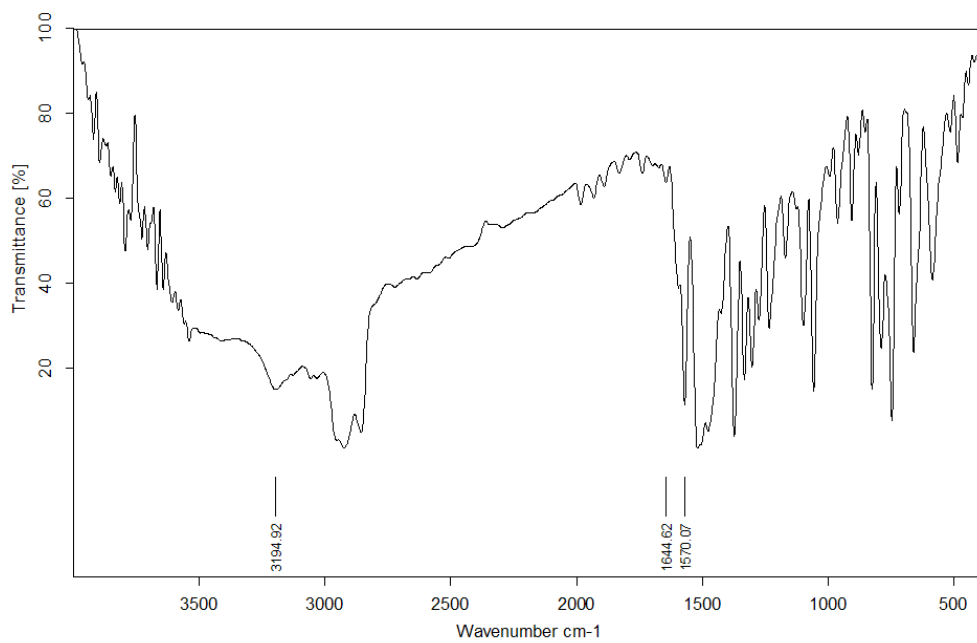

Fig.S7 IR spectrum of complex **2b**

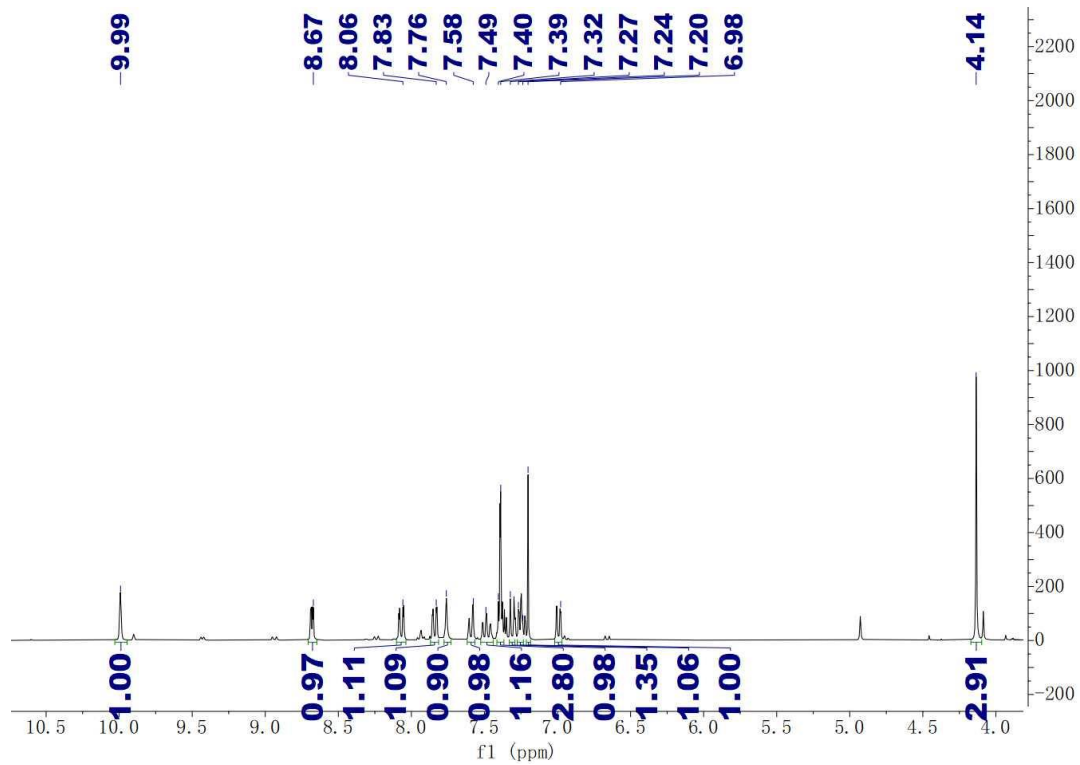

Fig.S8  $^1\text{H}$  NMR spectrum of complex **2b** ( $\text{CDCl}_3$ )

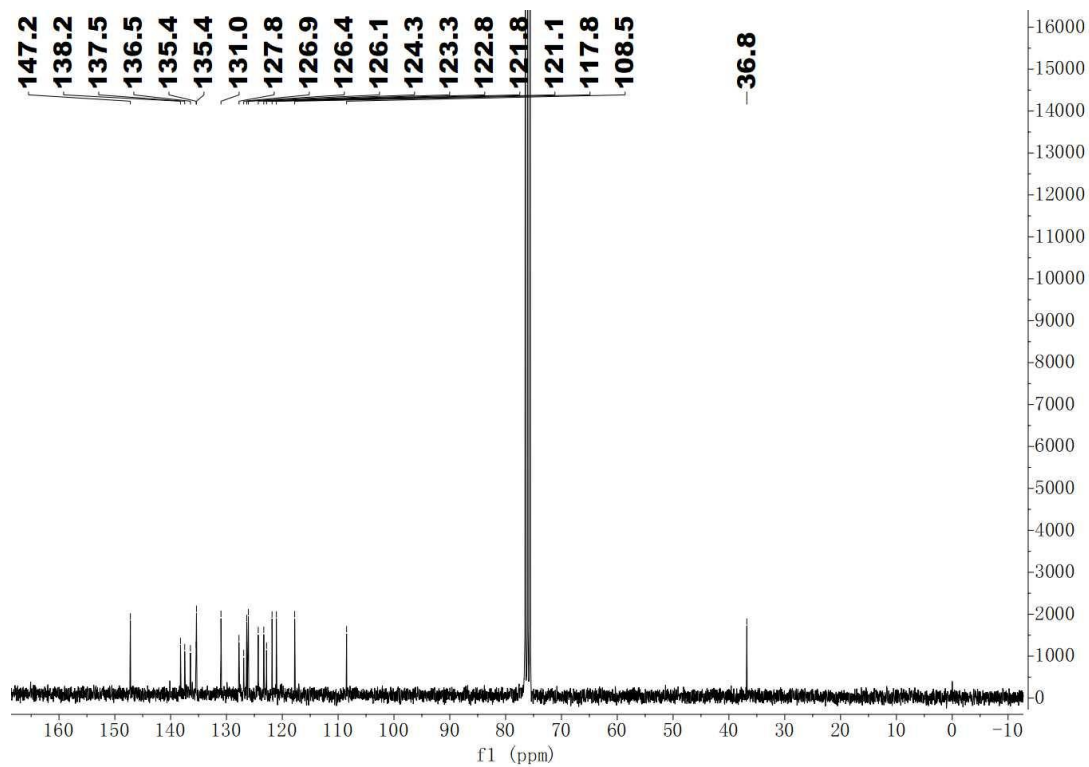

Fig.S9  $^{13}\text{C}$  NMR spectrum of complex **2b** ( $\text{CDCl}_3$ )

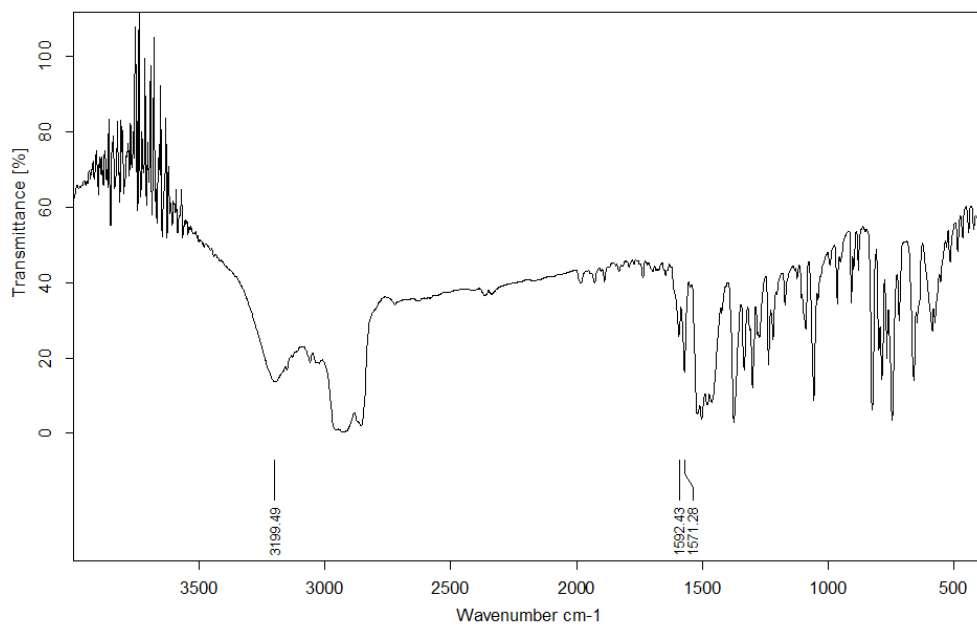

Fig.S10 IR spectrum of complex **2c**

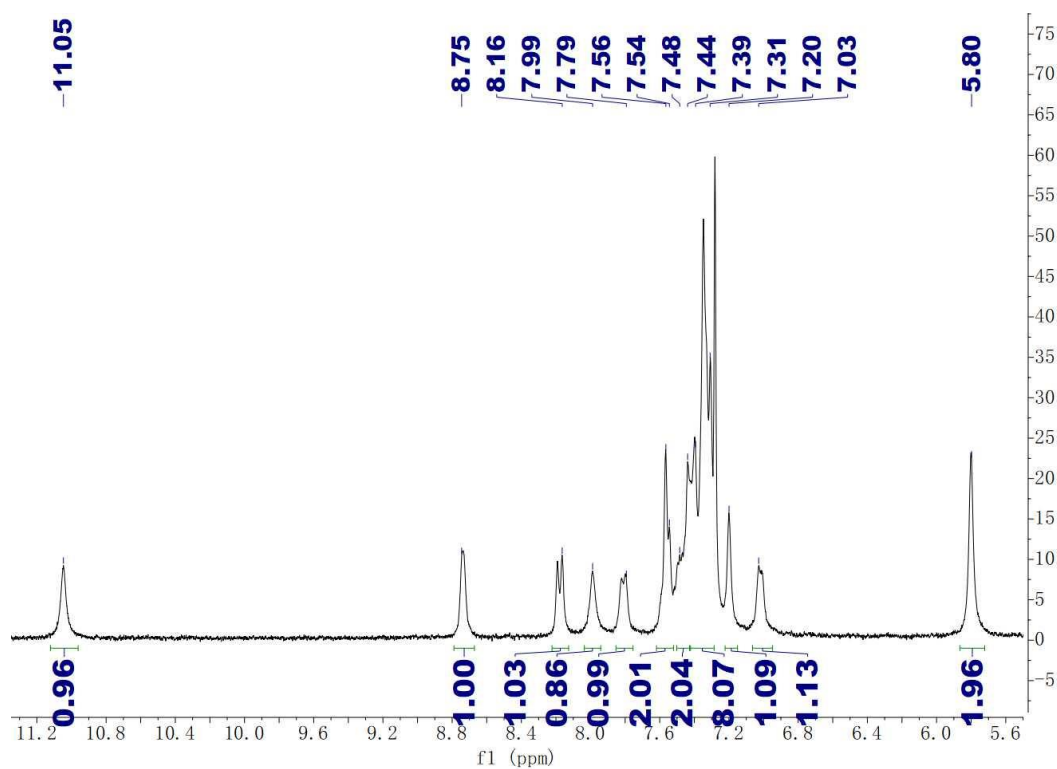

Fig.S11 <sup>1</sup>H NMR spectrum of complex **2c** (CDCl<sub>3</sub>)

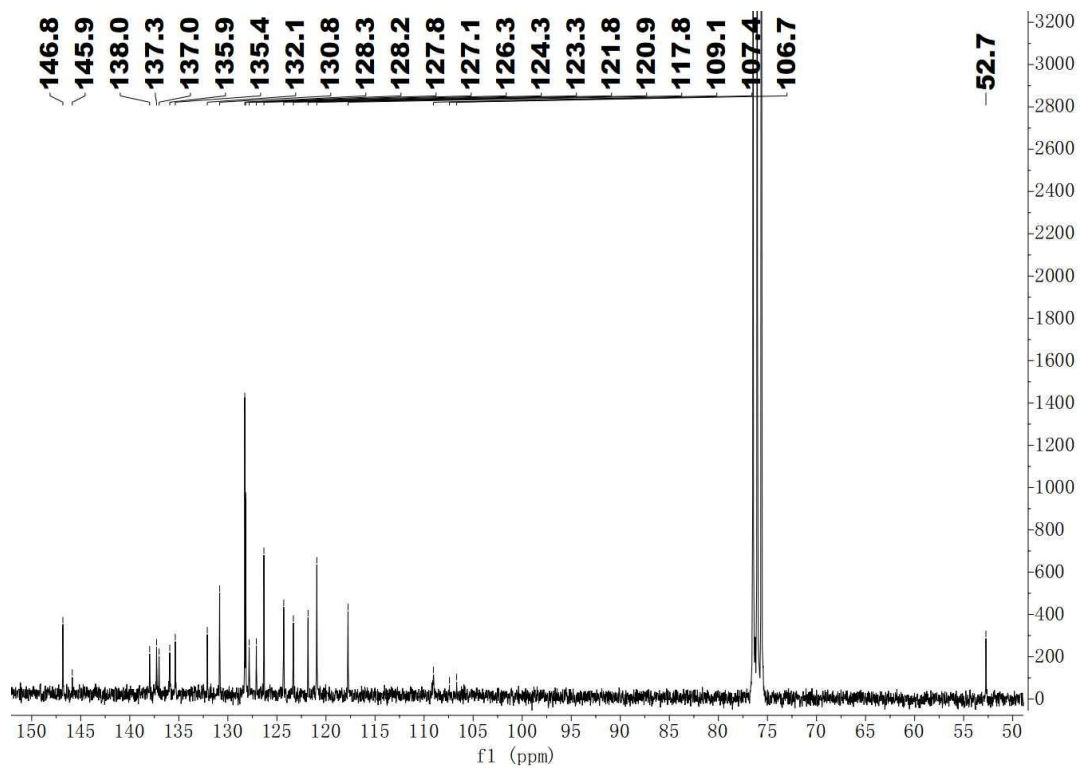

Fig.S12  $^{13}\text{C}$  NMR spectrum of complex **2c** ( $\text{CDCl}_3$ )



SIV IR,  $^1\text{H}$ ,  $^{13}\text{C}$  NMR spectra of complexes **3a - 3c** and **5a - 5b**

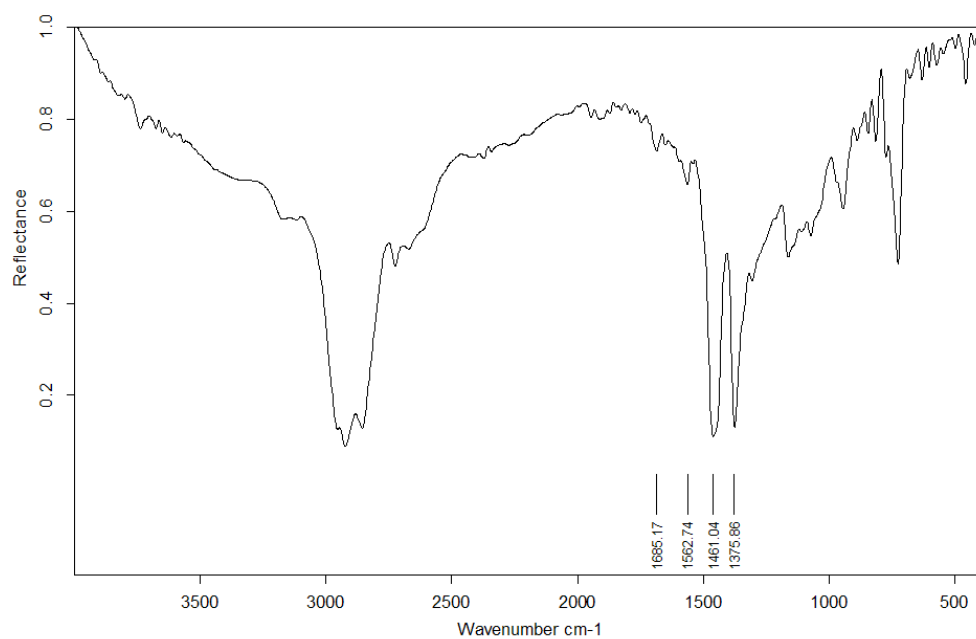

Fig.S13 IR spectrum of complex **3a**

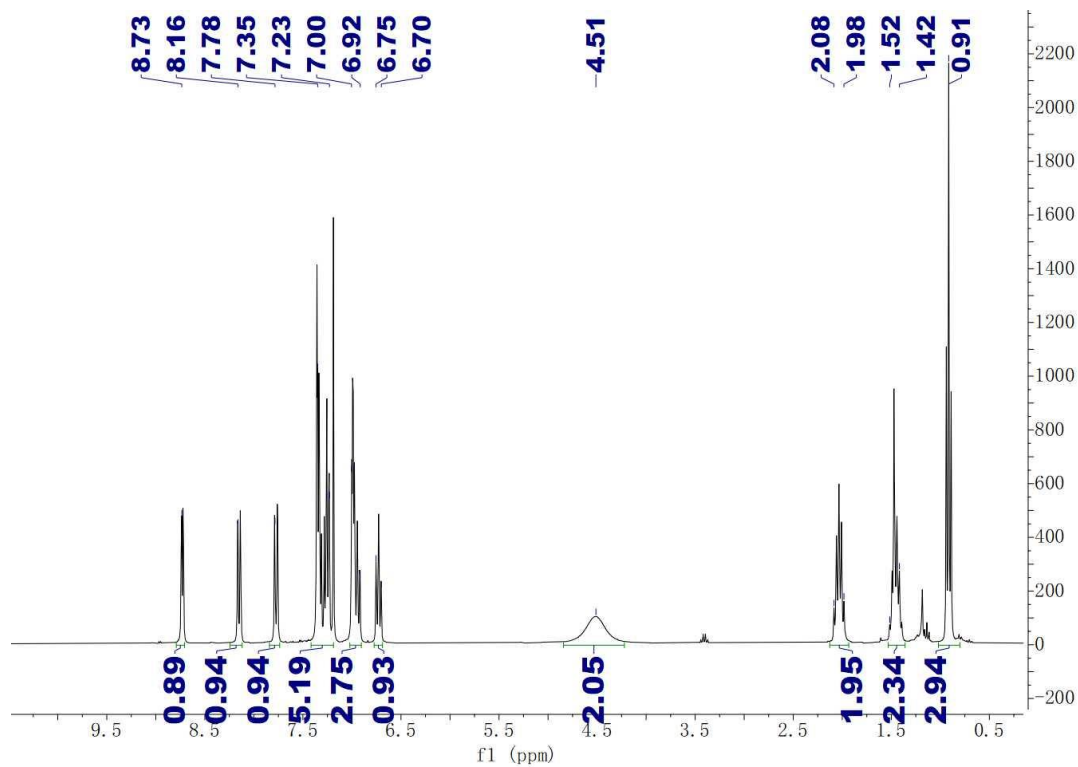

Fig.S14  $^1\text{H}$  NMR spectrum of complex **3a** ( $\text{CDCl}_3$ )

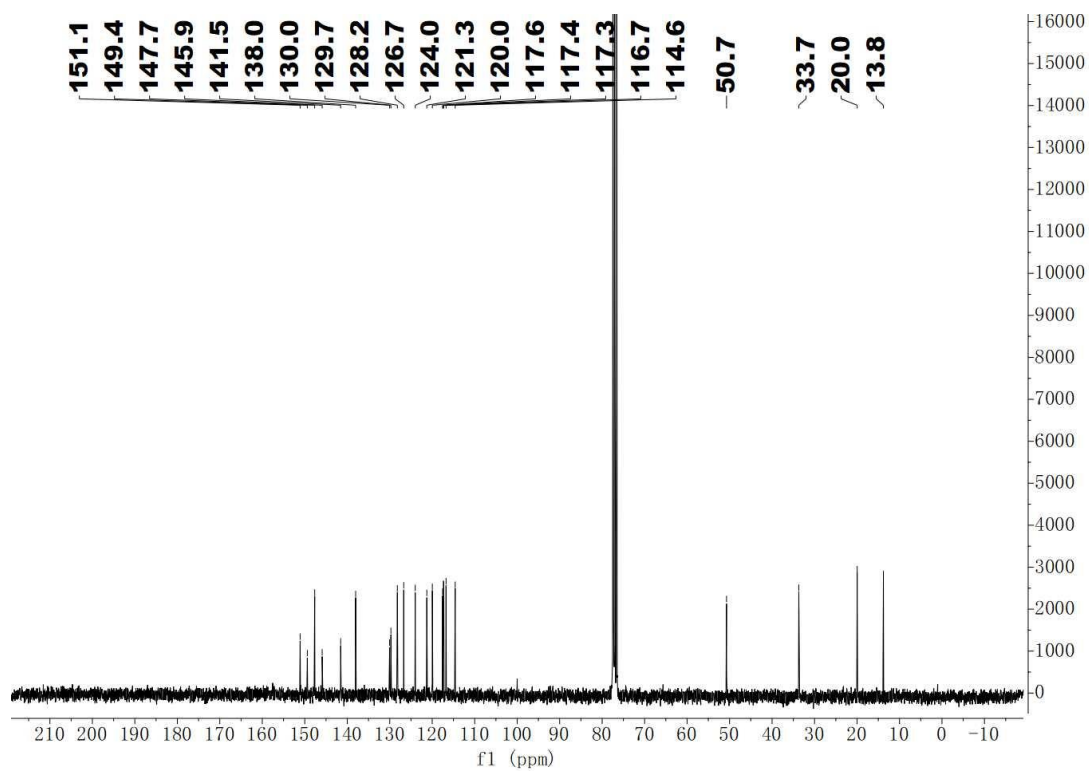

Fig.S15  $^{13}\text{C}$  NMR spectrum of complex **3a** ( $\text{CDCl}_3$ )

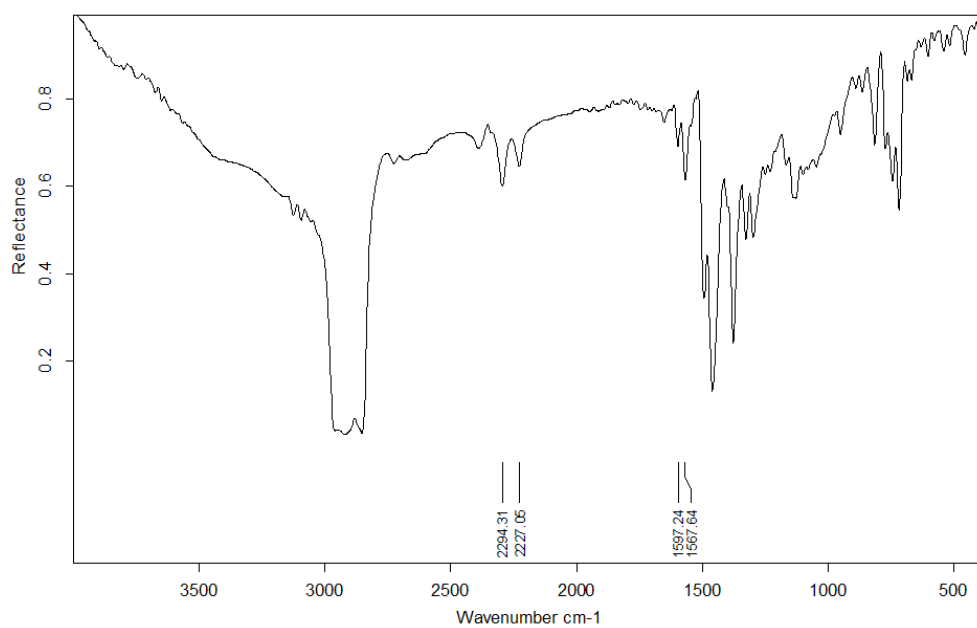

Fig.S16 IR spectrum of complex **3b** ( $\text{CDCl}_3$ )

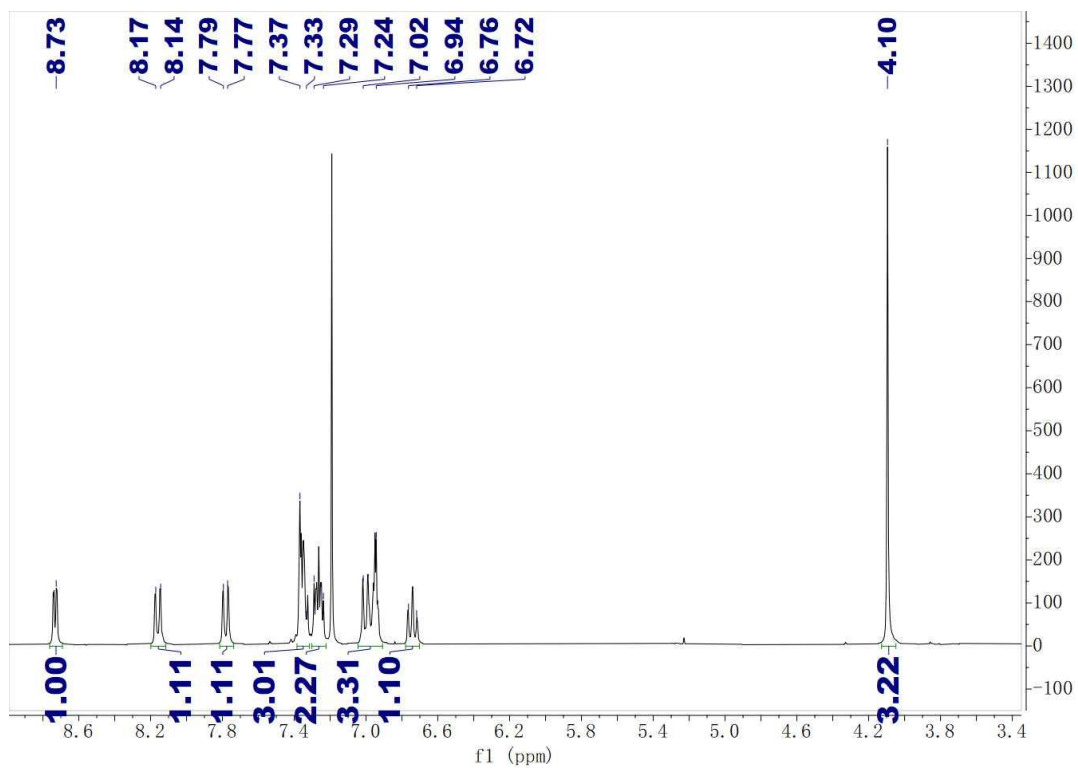

Fig.S17  $^1\text{H}$  NMR spectrum of complex **3b** ( $\text{CDCl}_3$ )

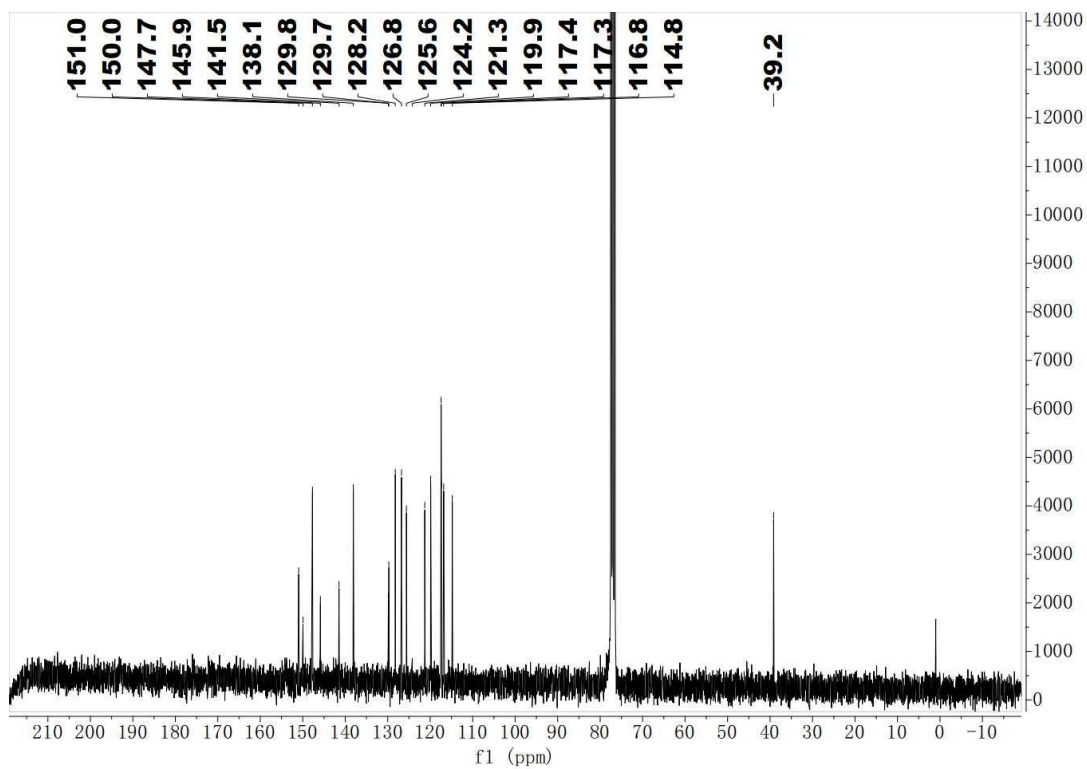

Fig.S18  $^{13}\text{C}$  NMR spectrum of complex **3b** ( $\text{CDCl}_3$ )

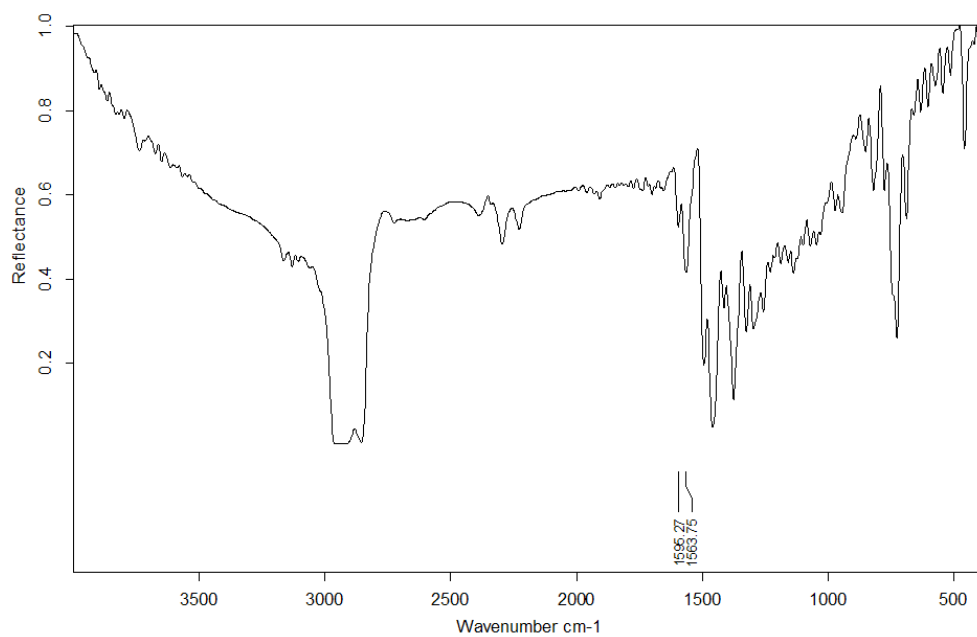

Fig.S19 IR spectrum of complex **3c**

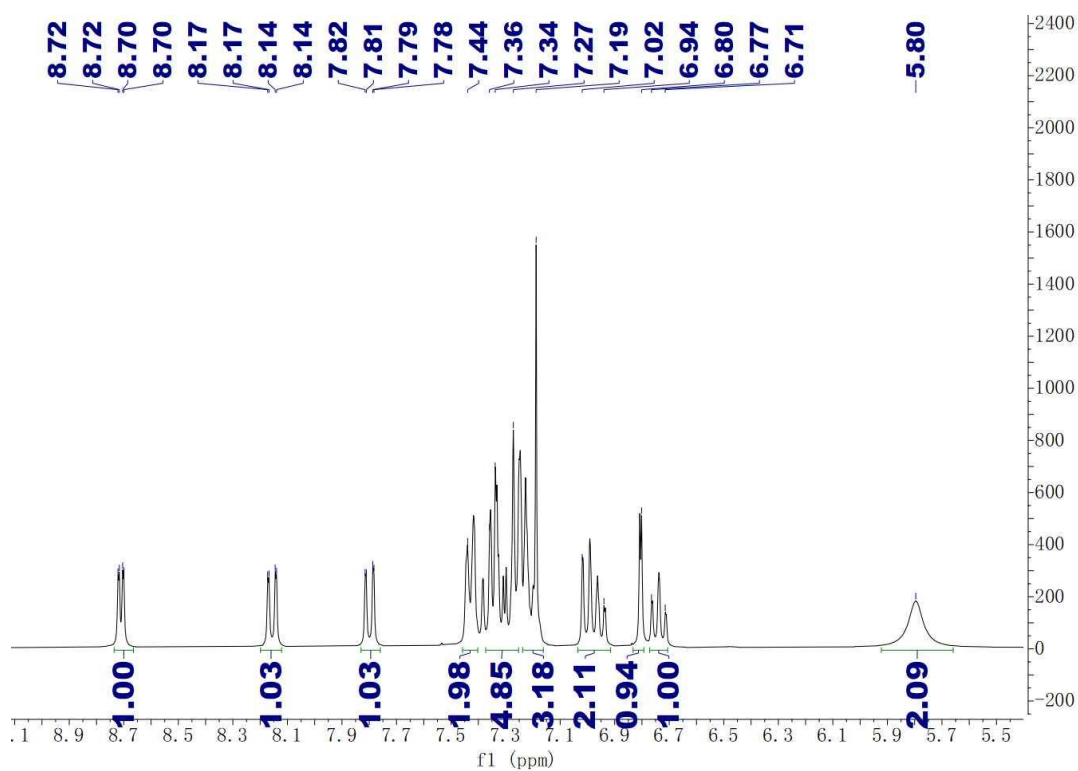

Fig.S20 <sup>1</sup>H NMR spectrum of complex **3c** (CDCl<sub>3</sub>)

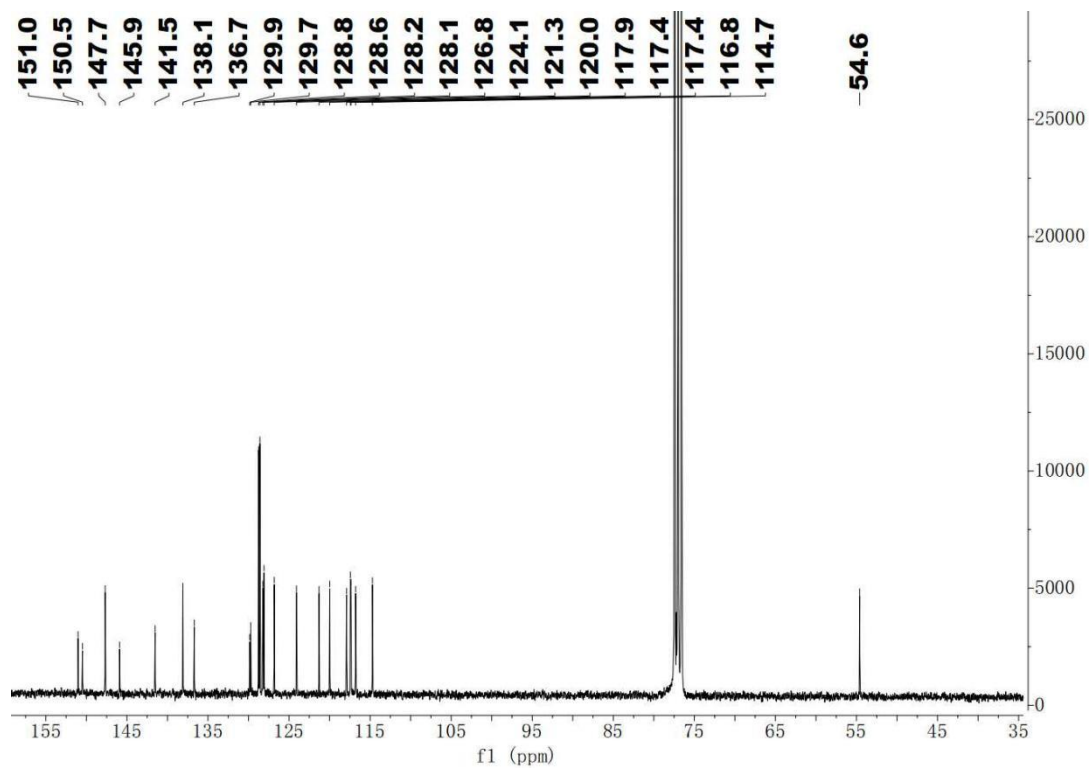

Fig.S21  $^{13}\text{C}$  NMR spectrum of complex **3c** ( $\text{CDCl}_3$ )

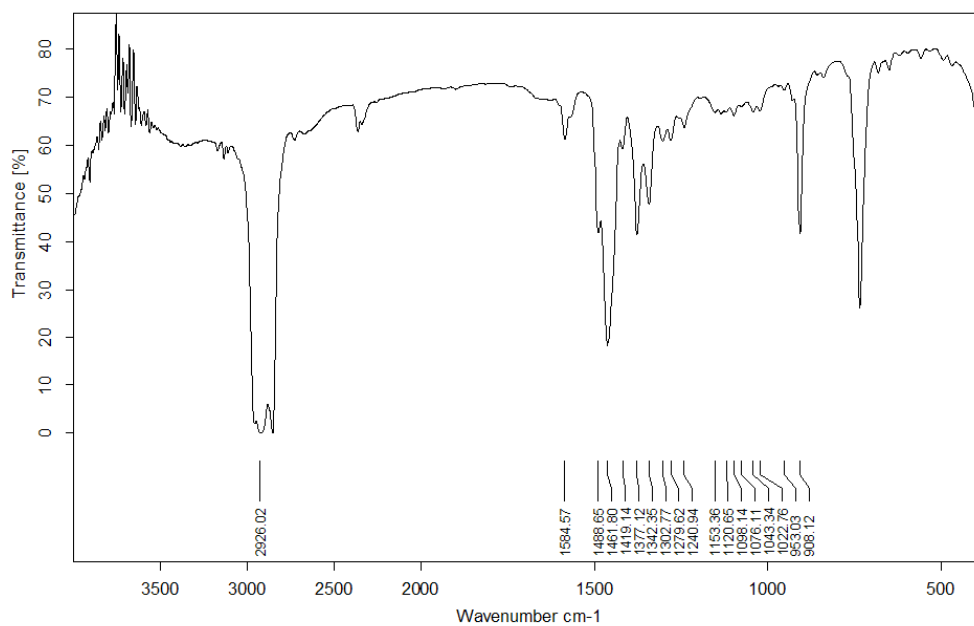

Fig.S22 IR spectrum of complex **5a**

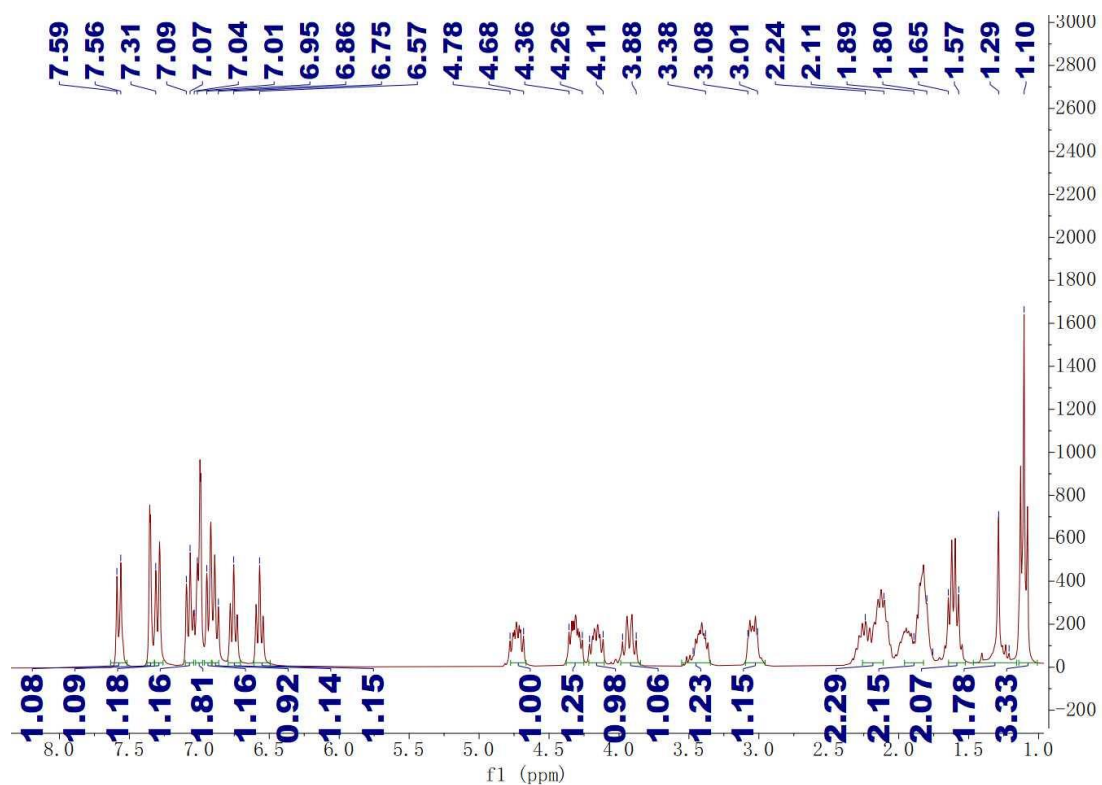

Fig.S23  $^1\text{H}$  NMR spectrum of complex **5a** ( $\text{CDCl}_3$ )

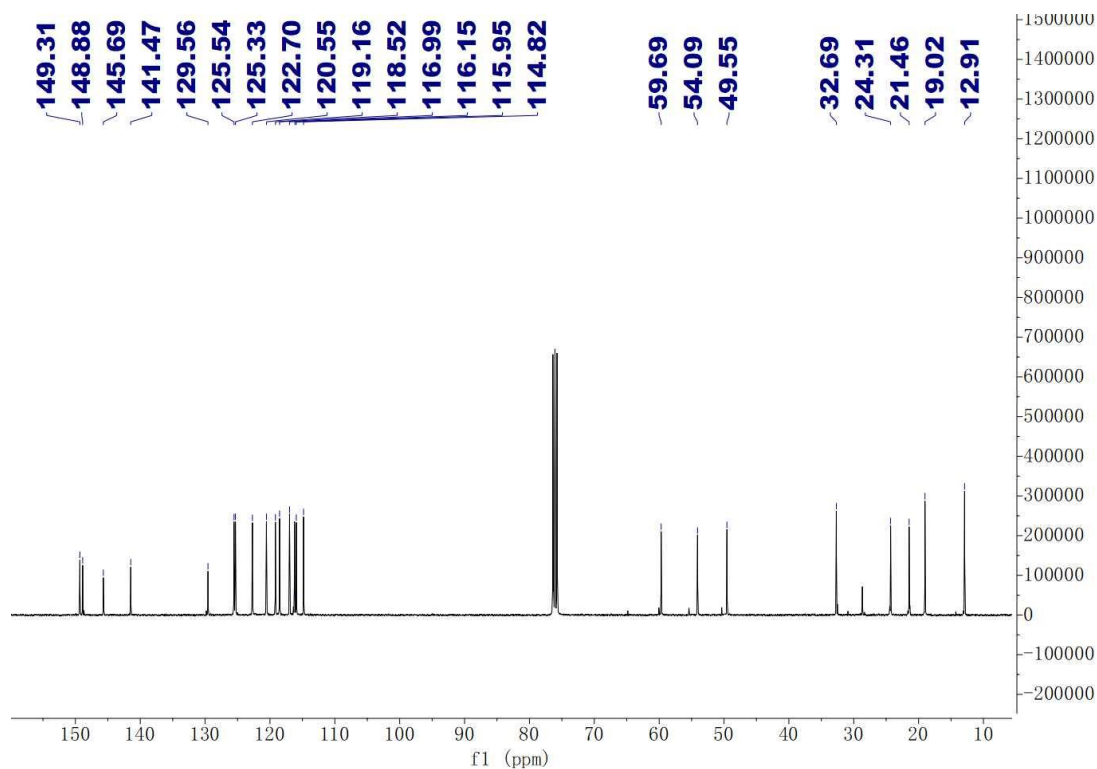

Fig.S24  $^{13}\text{C}$  NMR spectrum of complex **5a** ( $\text{CDCl}_3$ )

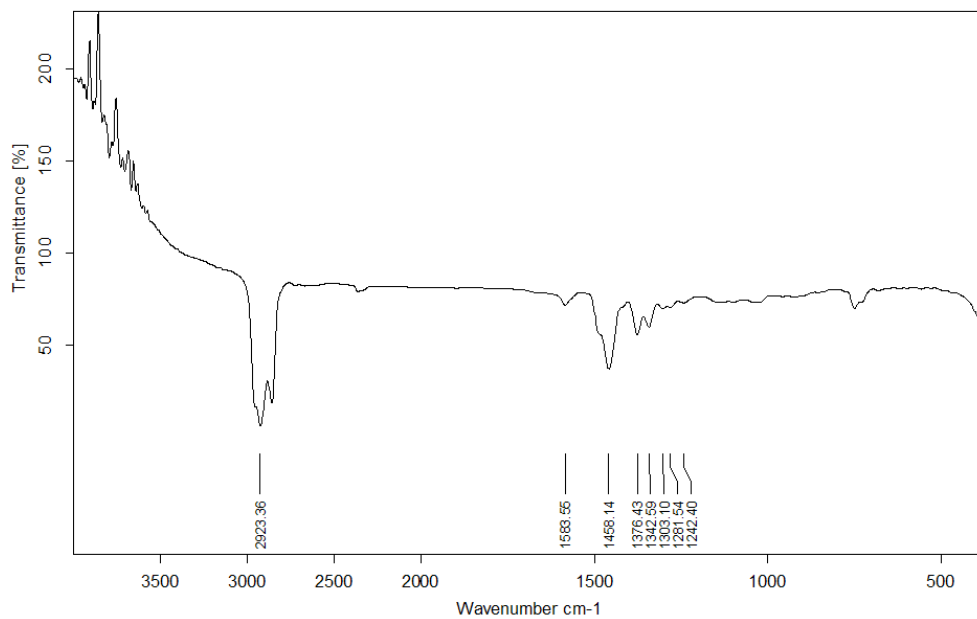

Fig.S25 IR spectrum of complex **5b**

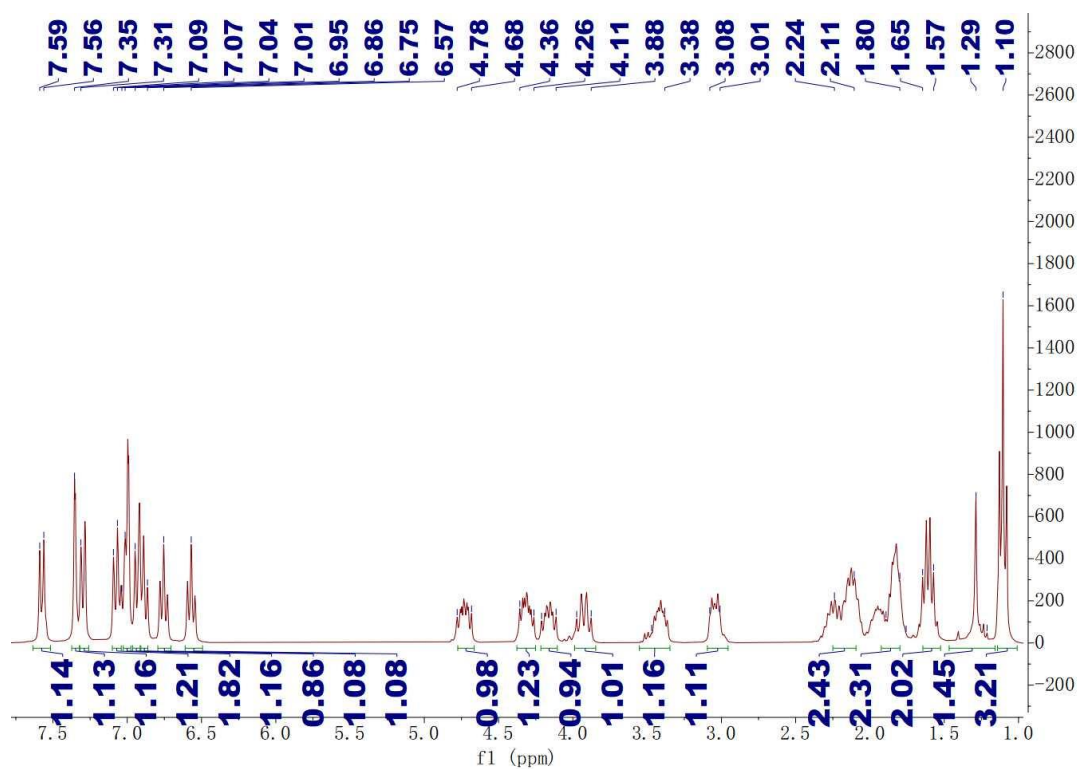

Fig.S26 <sup>1</sup>H NMR spectrum of complex **5b** (CDCl<sub>3</sub>)

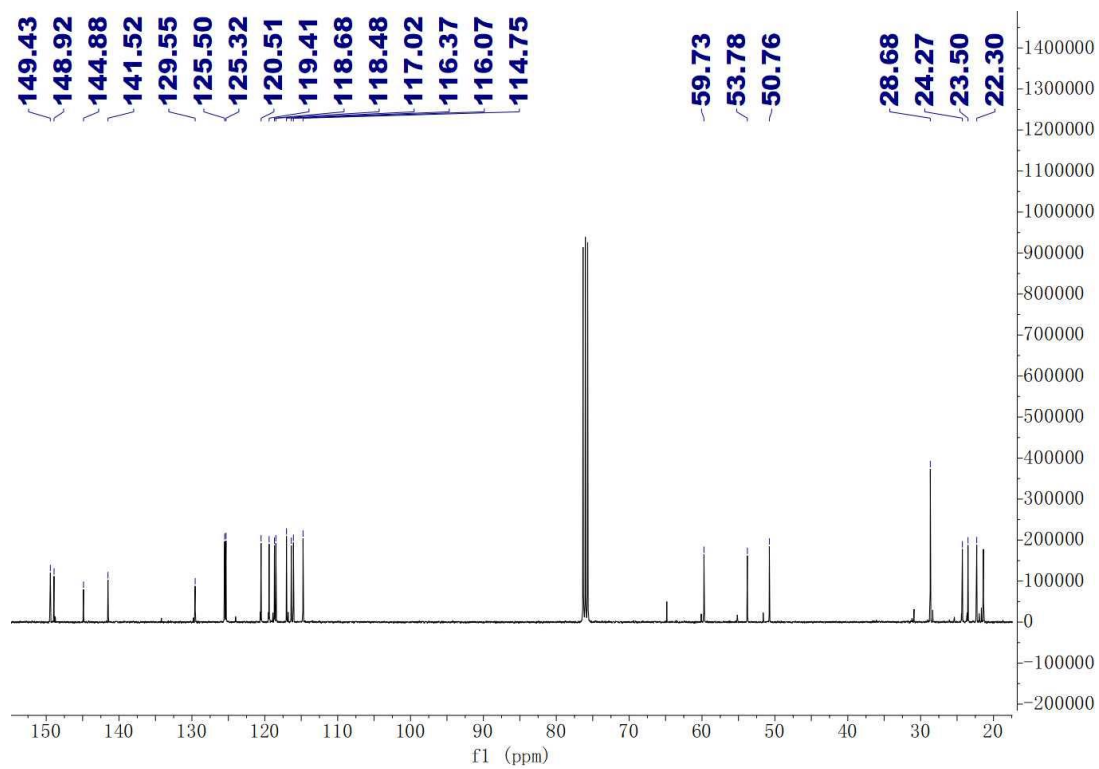

Fig.S27  $^{13}\text{C}$  NMR spectrum of complex **5b** ( $\text{CDCl}_3$ )

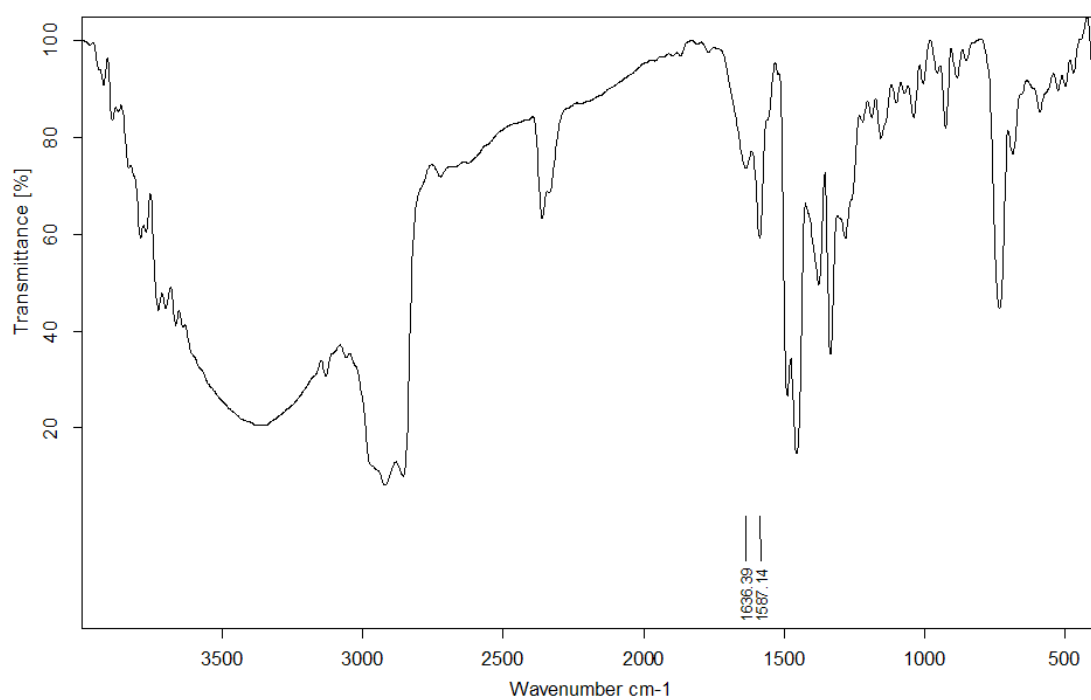

Fig.S28 IR spectrum of complex **5c**



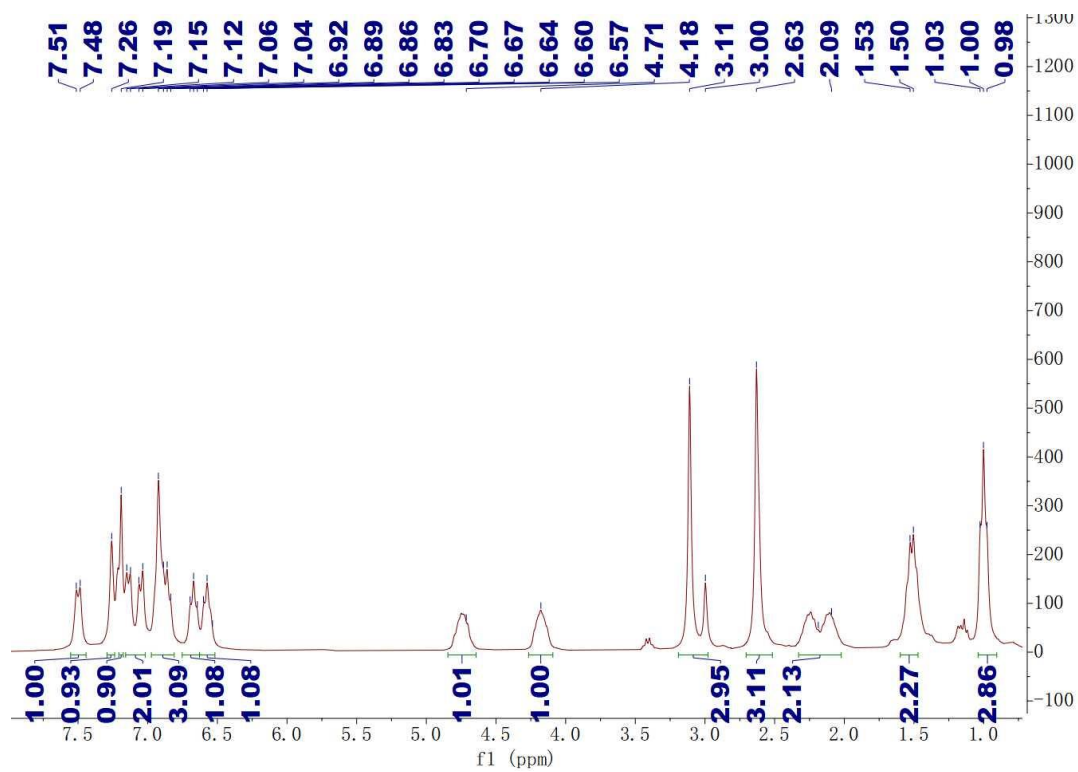

Fig.S29  $^1\text{H}$  NMR spectrum of complex **5c** ( $\text{CDCl}_3$ )

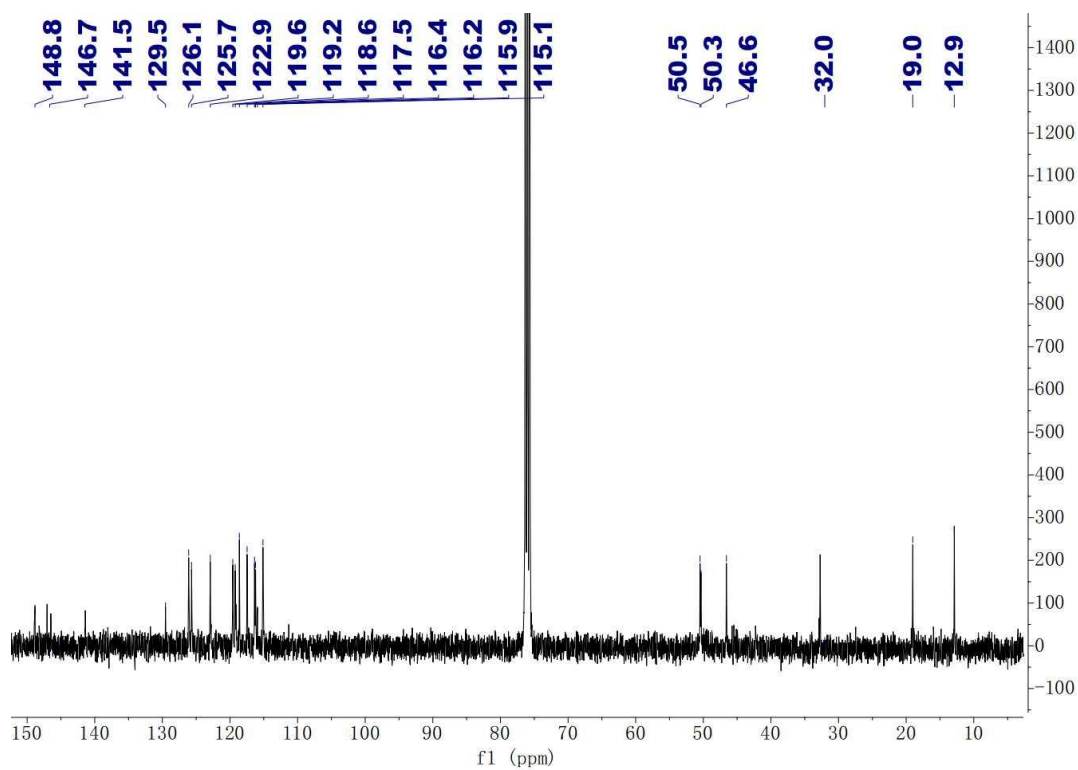

Fig.S30  $^{13}\text{C}$  NMR spectrum of complex **5c** ( $\text{CDCl}_3$ )

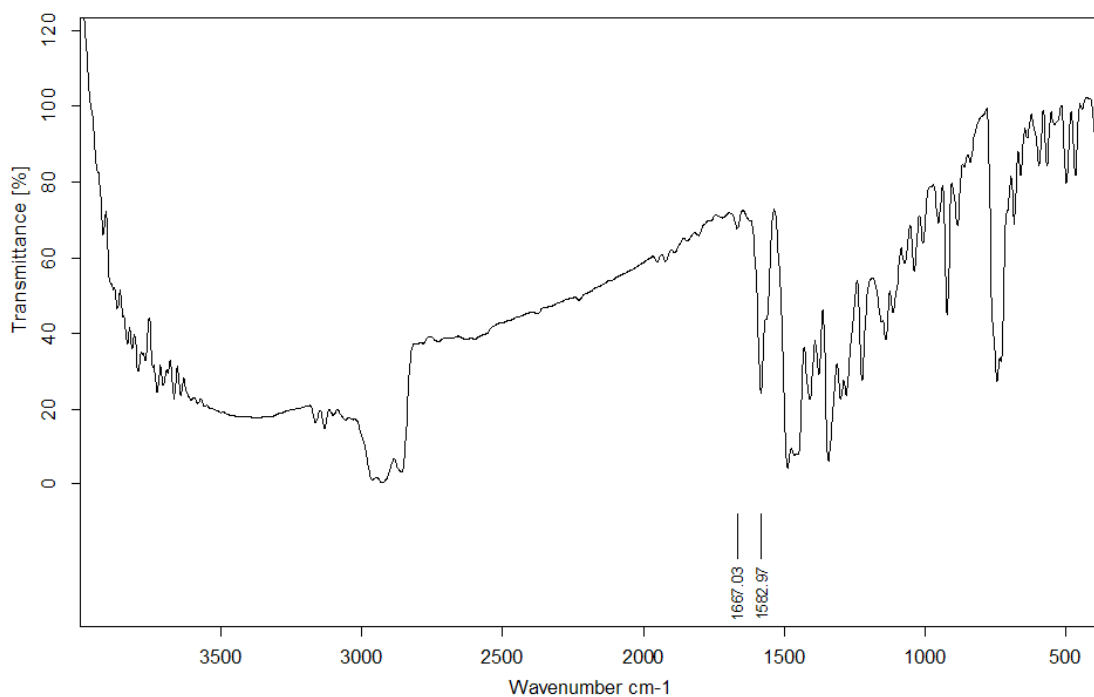

Fig.S31 IR spectrum of complex **5d**

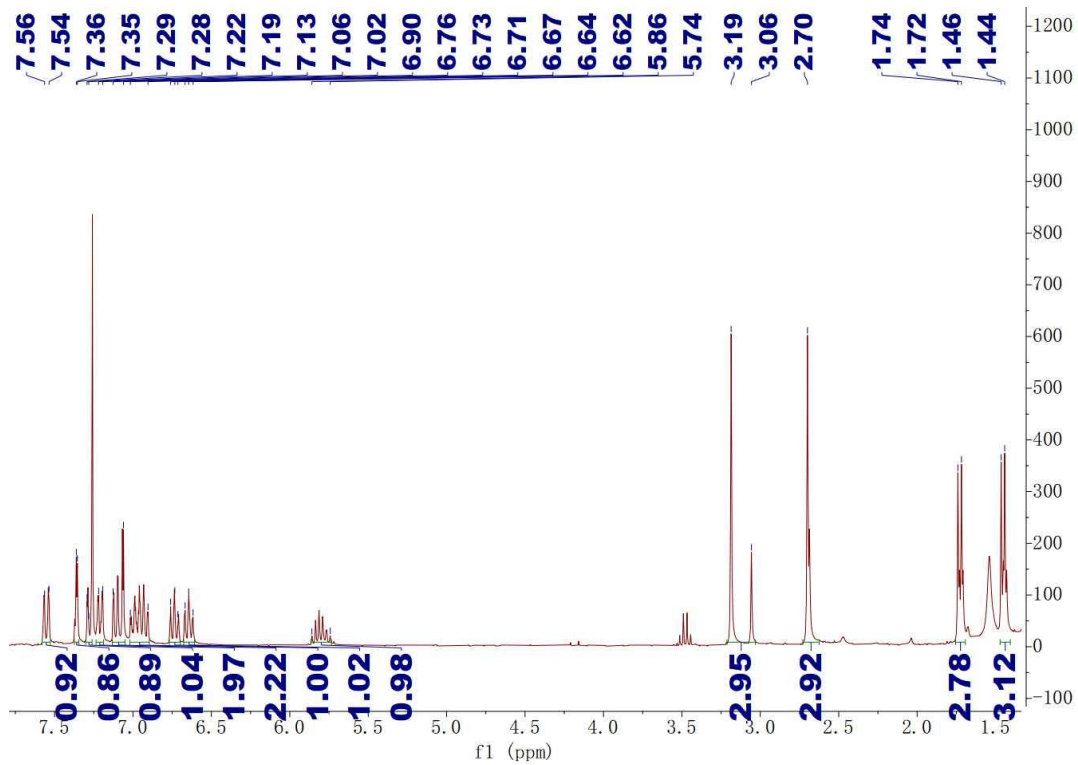

Fig.S32 <sup>1</sup>H NMR spectrum of complex **5d** (CDCl<sub>3</sub>)

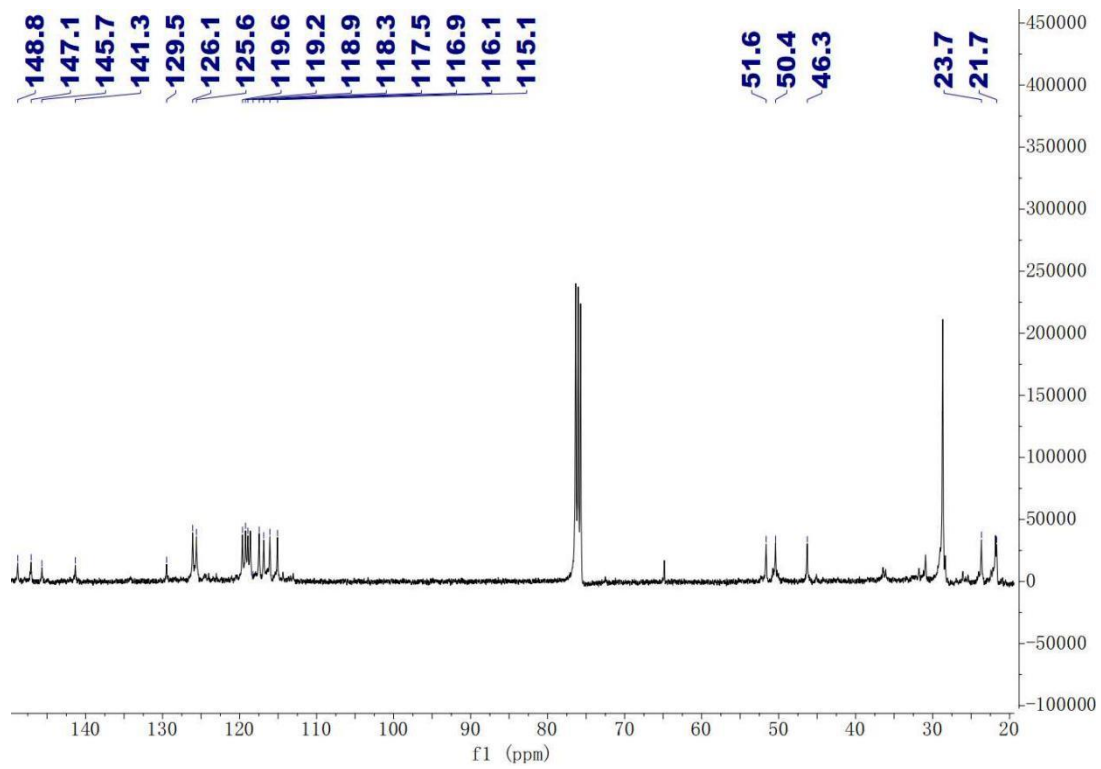

Fig.S33  $^{13}\text{C}$  NMR spectrum of complex **5d** ( $\text{CDCl}_3$ )

SV  $^1\text{H}$  NMR Spectra and GC Spectrum of the Alcohol Products

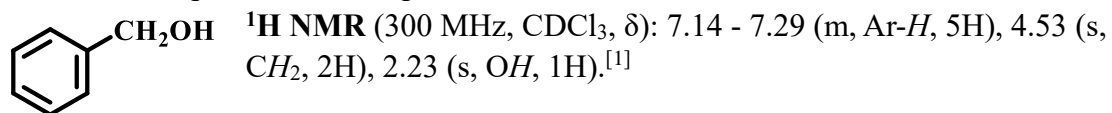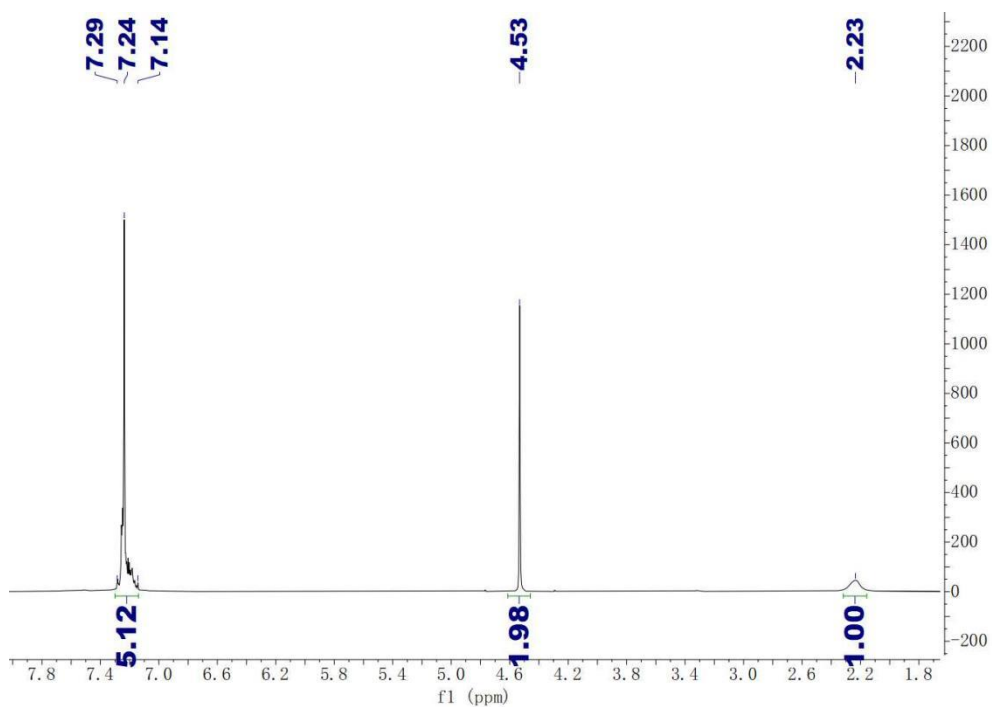

Fig.S34  $^1\text{H}$  NMR spectrum of **6a** ( $\text{CDCl}_3$ )

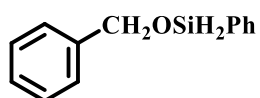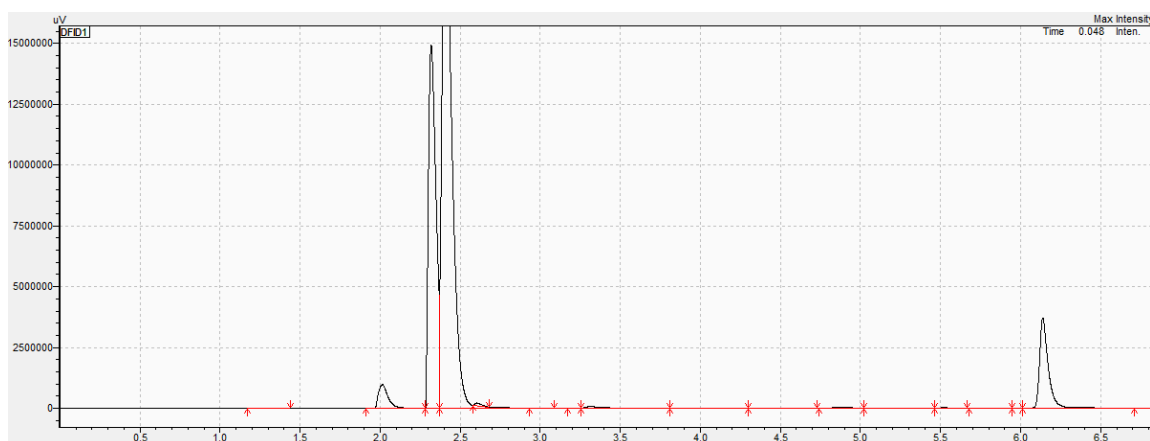

Fig.S35 GC spectrum of **6a**

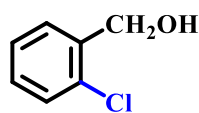

$^1\text{H NMR}$  (300 MHz,  $\text{CDCl}_3$ ,  $\delta$ ): 7.14-7.41 (m, Ar-H, 4H), 4.71 (s,  $\text{CH}_2$ , 2H), 1.92 (s, OH, 1H).<sup>[1]</sup>

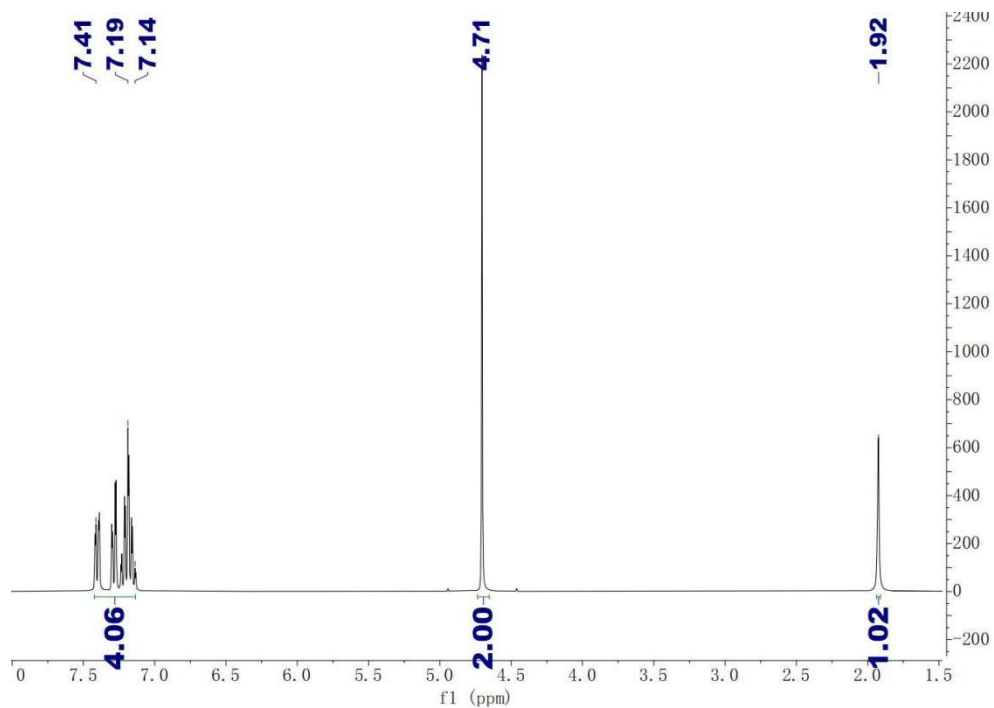

Fig.S36  $^1\text{H NMR}$  spectrum of **6b** ( $\text{CDCl}_3$ )

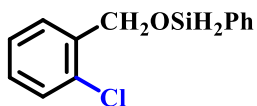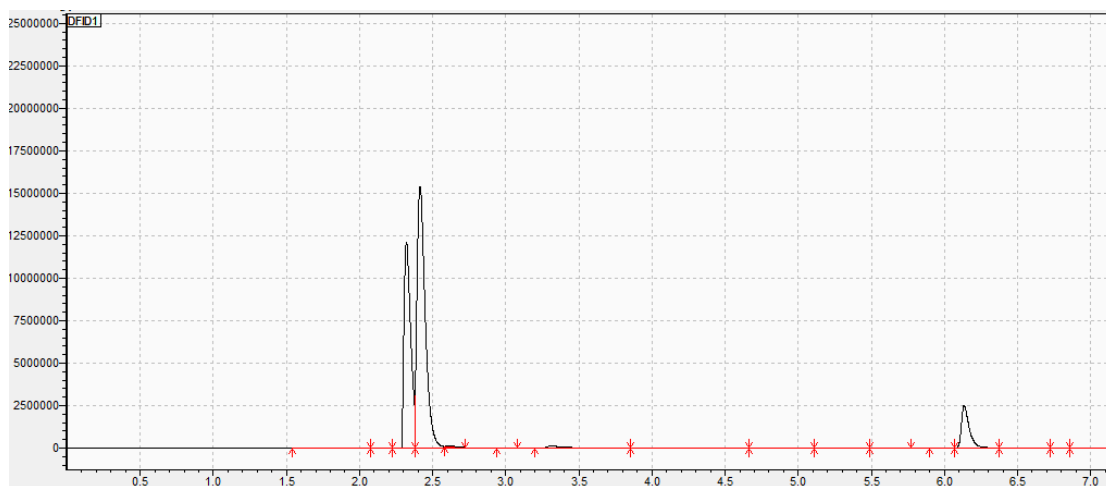

Fig.S37 GC spectrum of **6b**

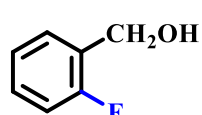

$^1\text{H NMR}$  (300 MHz,  $\text{CDCl}_3$ ,  $\delta$ ): 6.91-7.33 (m, Ar-H, 4H), 4.63 (s,  $\text{CH}_2$ , 2H), 2.33 (s, OH, 1H).<sup>[2]</sup>

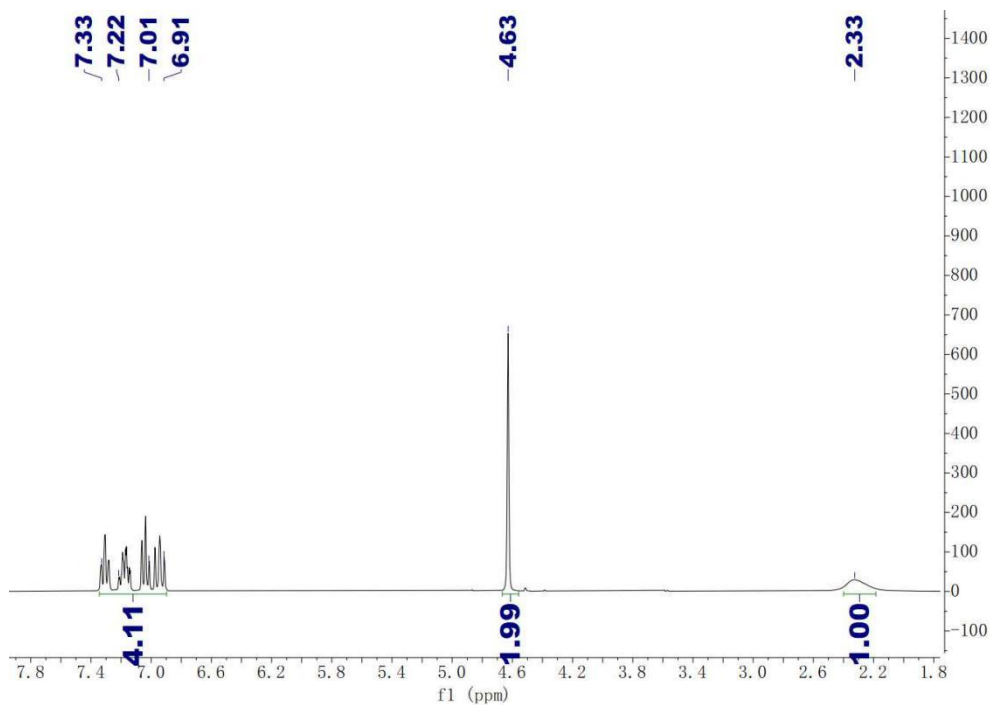

Fig.S38  $^1\text{H NMR}$  spectrum of **6c** ( $\text{CDCl}_3$ )

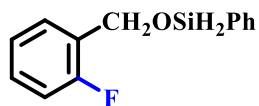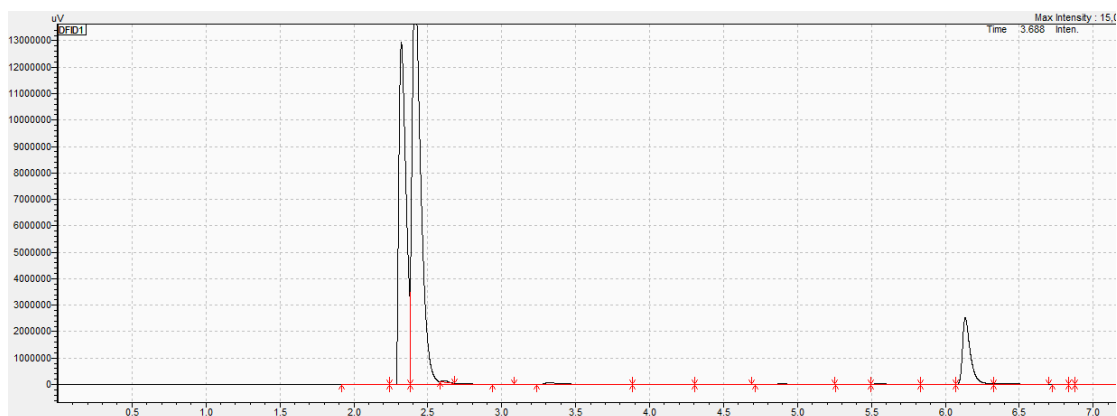

Fig.S39 GC spectrum of **6c**

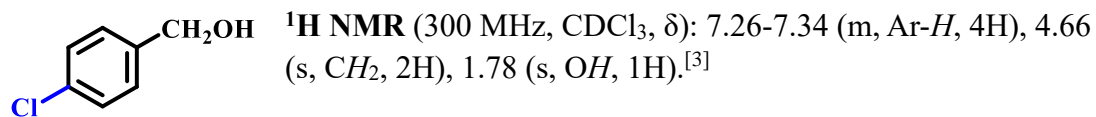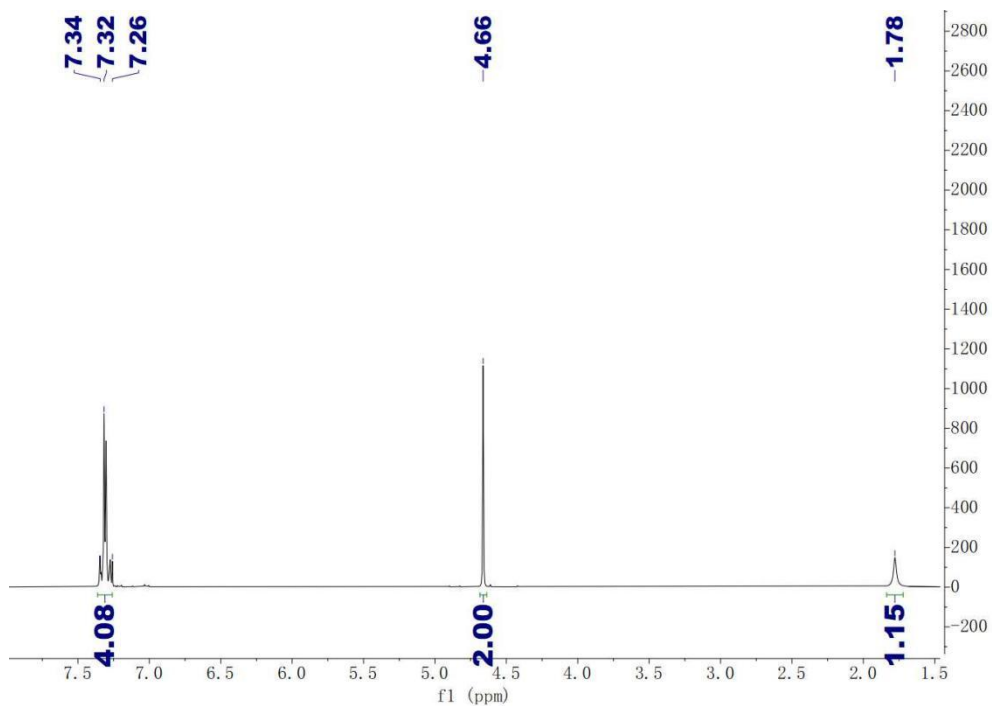

Fig.S40  $^1\text{H NMR}$  spectrum of **6d** ( $\text{CDCl}_3$ )

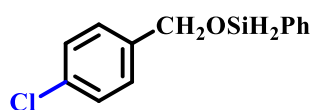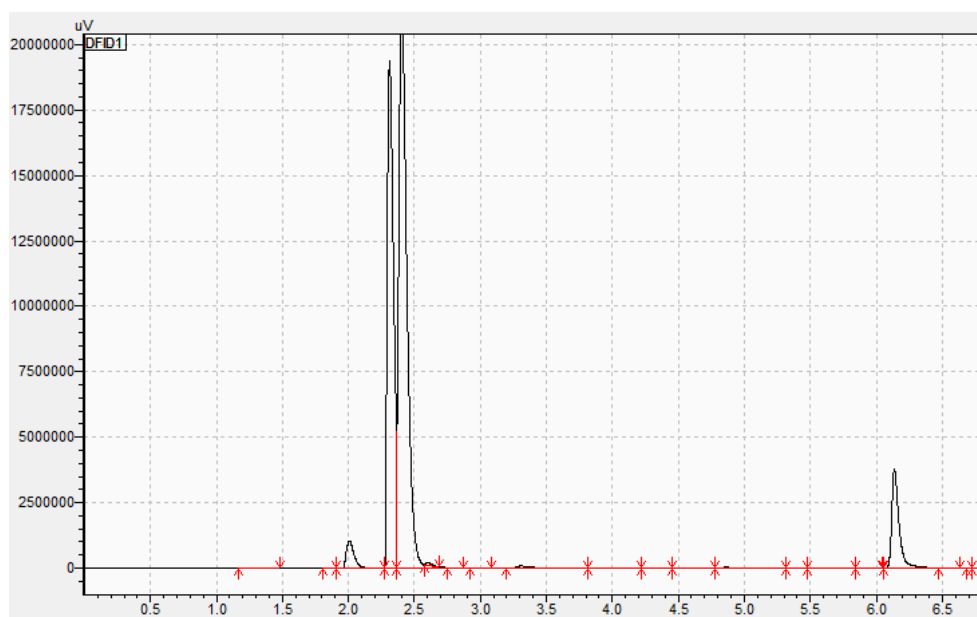

Fig.S41 GC spectrum of **6d**

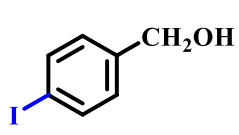

$^1\text{H NMR}$  (300 MHz,  $\text{CDCl}_3$ ,  $\delta$ ): 7.54 (d, Ar-H, 2H), 6.93 (d, Ar-H, 2H), 4.43 (s,  $\text{CH}_2$ , 2H), 2.71 (s, OH, 1H).<sup>[1]</sup>

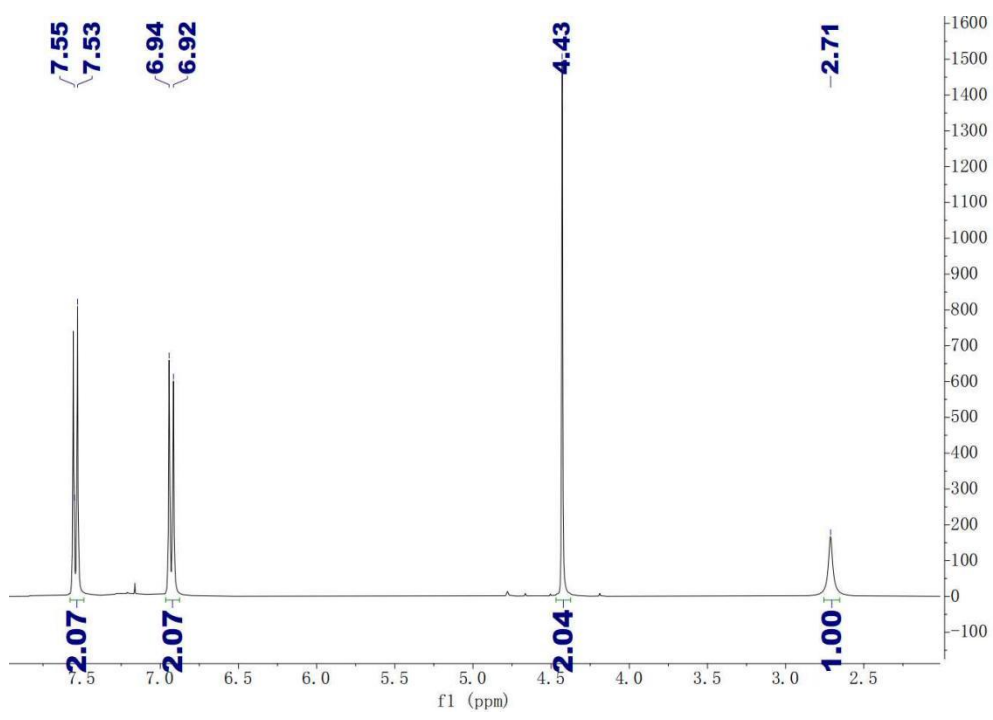

Fig.S42  $^1\text{H NMR}$  spectrum of 6e ( $\text{CDCl}_3$ )

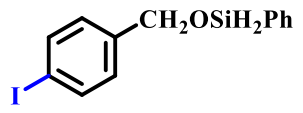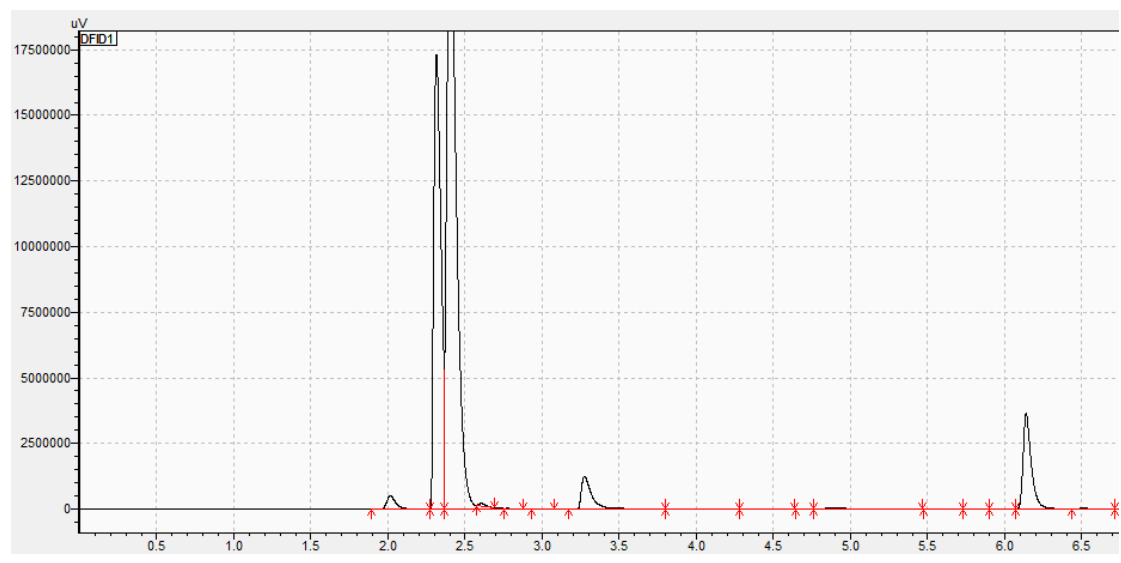

Fig.S43 GC spectrum of 6e



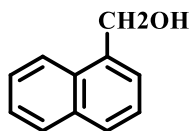

$^1\text{H}$  NMR (300 MHz,  $\text{CDCl}_3$ ,  $\delta$ ): 7.21-7.85 (m, Ar-H, 7H), 4.83 (s,  $\text{CH}_2$ , 2H), 2.45 (s, OH, 1H).<sup>[2]</sup>

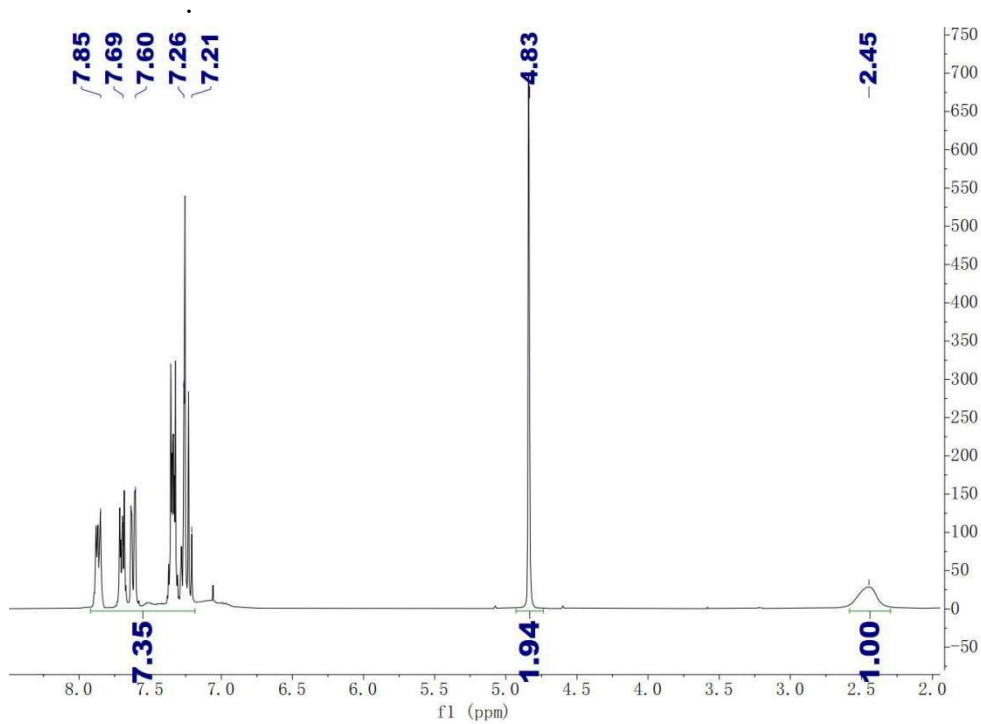

Fig.S44  $^1\text{H}$  NMR spectrum of **6f** ( $\text{CDCl}_3$ )

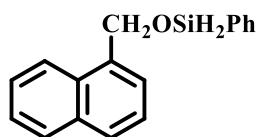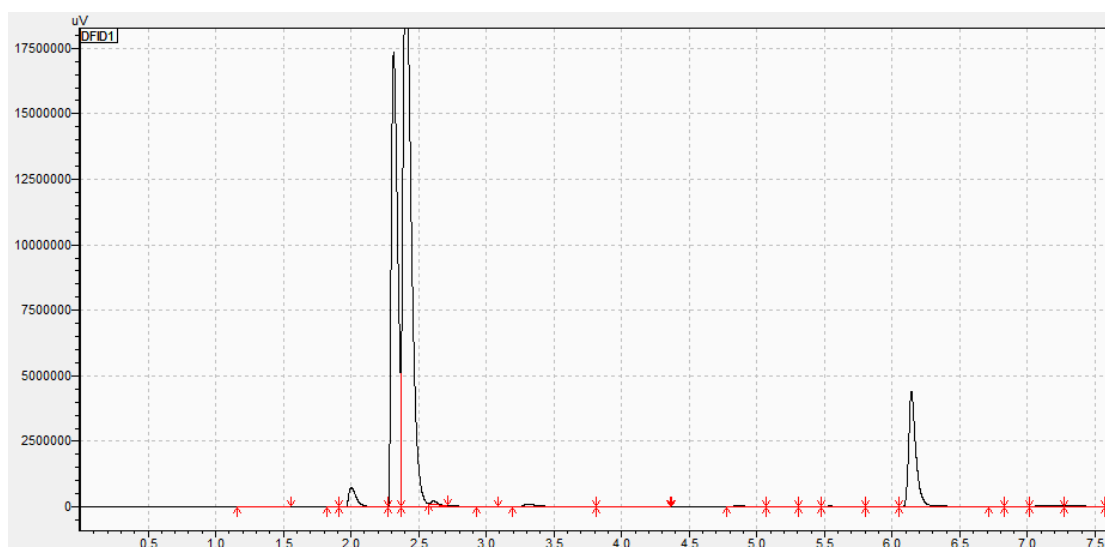

Fig.S45 GC spectrum of **6f**

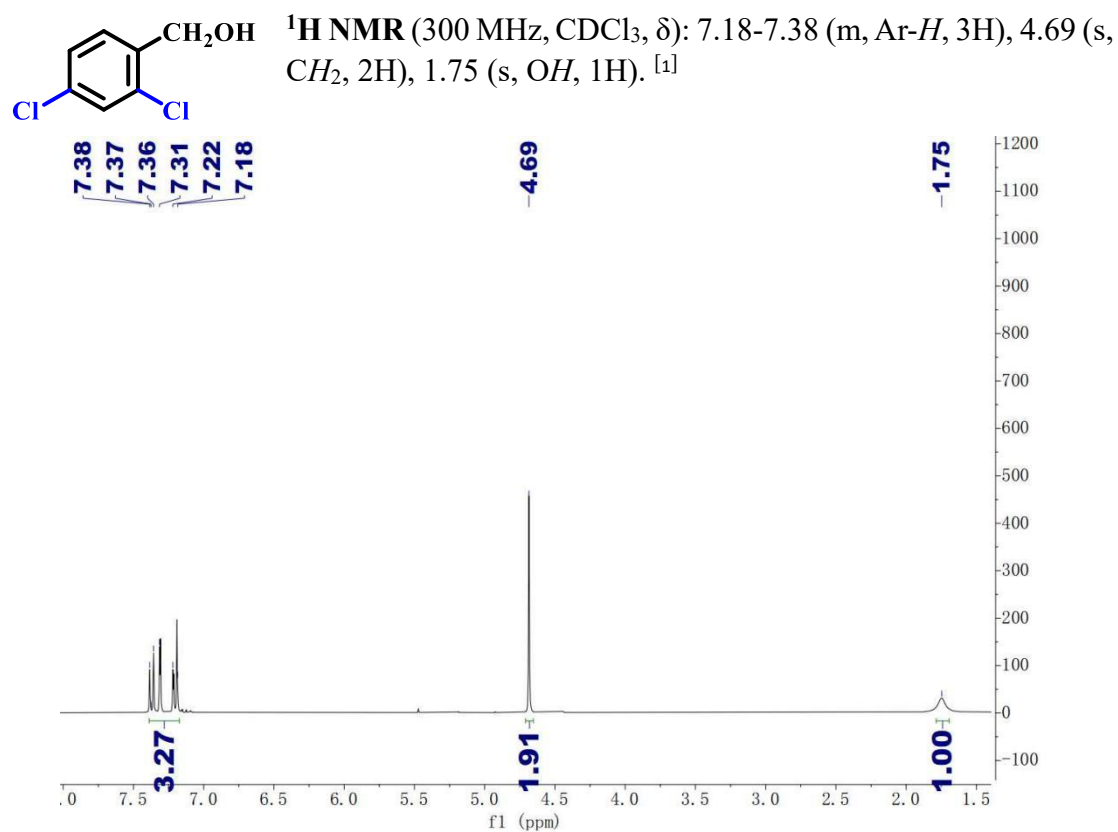

Fig.S46  $^1\text{H NMR}$  spectrum of **6g** ( $\text{CDCl}_3$ )

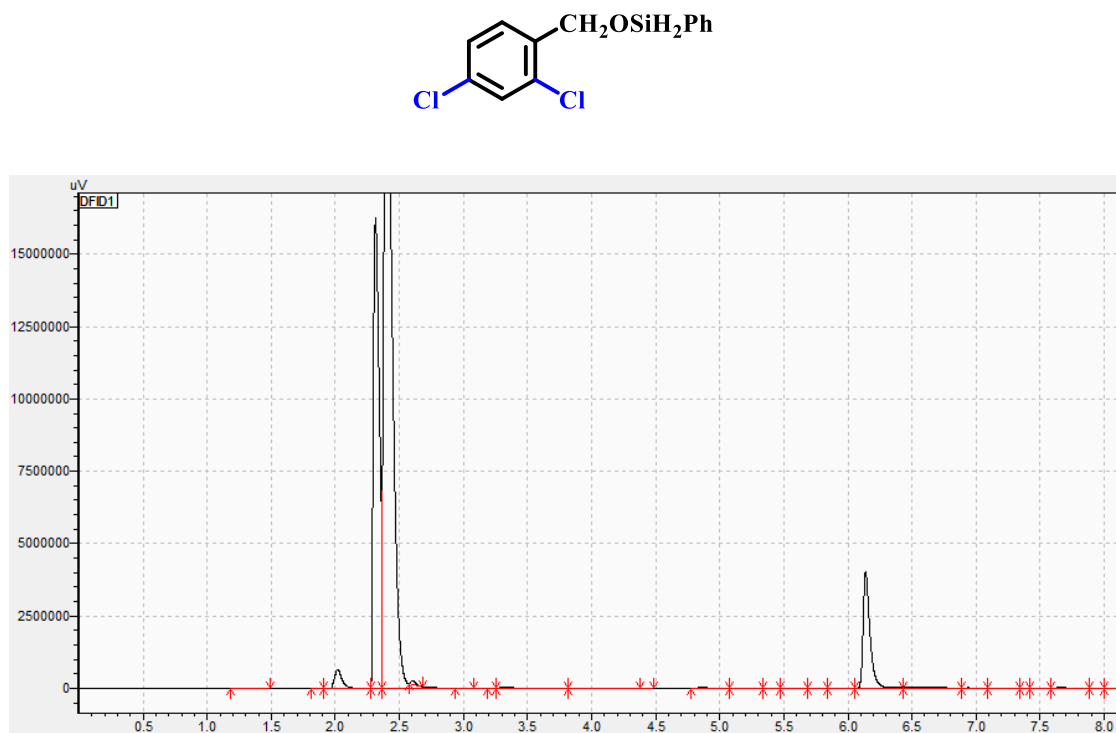

Fig.S47 GC spectrum of **6g**

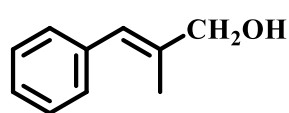

$^1\text{H NMR}$  (300 MHz,  $\text{CDCl}_3$ ,  $\delta$ ): 7.12-7.27 (m, Ar-H, 5H), 6.44 (d,  $\text{HC}=\text{C}$ , 1H), 4.10 (dd,  $\text{CH}_2$ , 2H), 2.10 (s, OH, 1H), 1.82 (d,  $\text{CH}_3$ , 3H).<sup>[2]</sup>

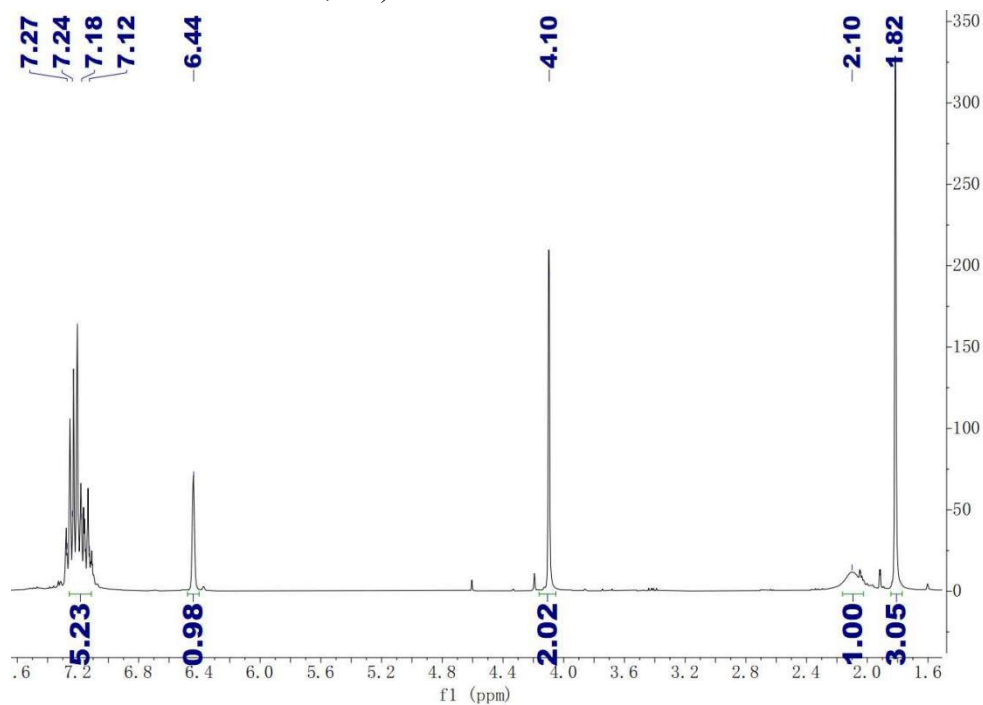

Fig.S48  $^1\text{H NMR}$  spectrum of **6h** ( $\text{CDCl}_3$ )

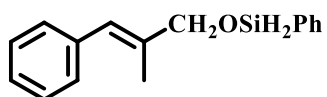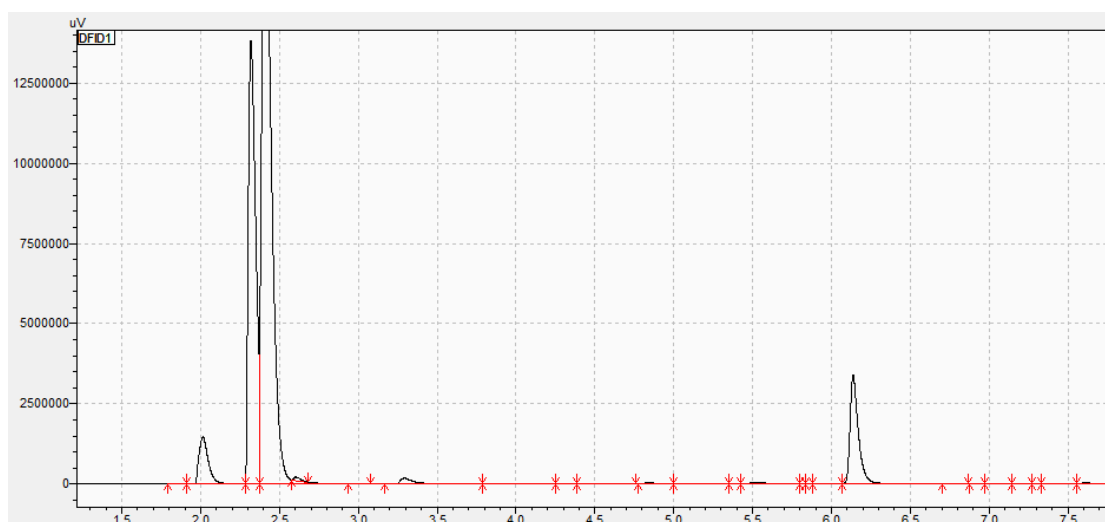

Fig.S49 GC spectrum of **6h**

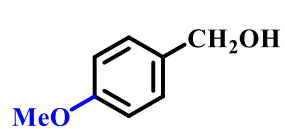

$^1\text{H NMR}$  (300 MHz,  $\text{CDCl}_3$ ,  $\delta$ ): 7.16 (d, Ar-H, 2H), 6.78 (d, Ar-H, 2H), 4.47 (s,  $\text{CH}_2$ , 2H), 3.69 (s,  $\text{OCH}_3$ , 3H), 2.21 (s, OH, 1H).<sup>[1]</sup>

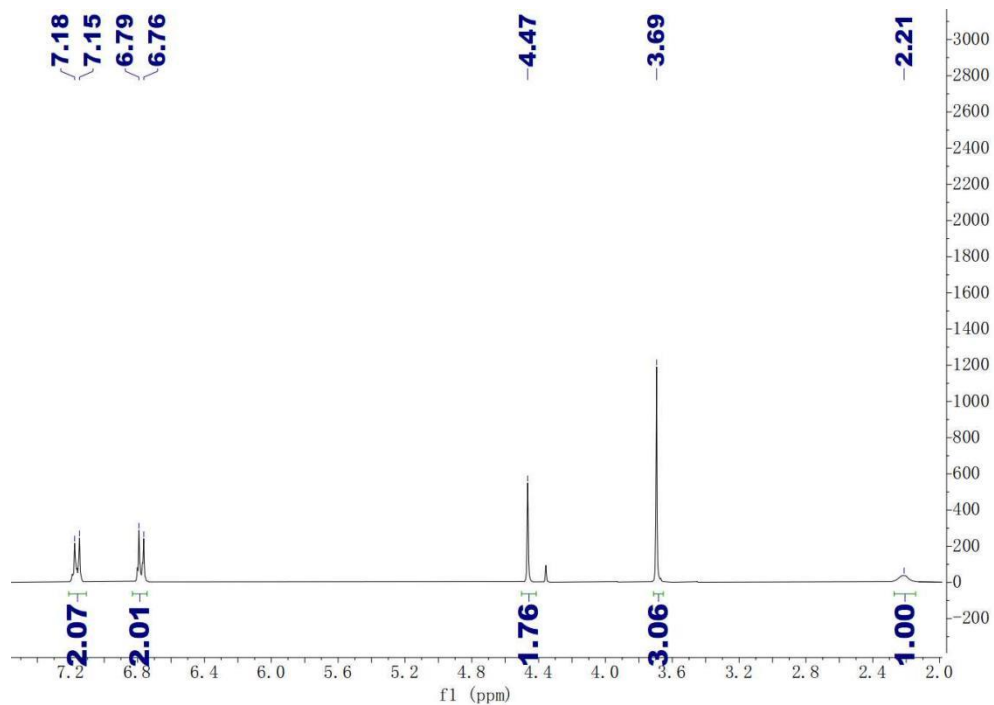

Fig.S50  $^1\text{H NMR}$  spectrum of **6i** ( $\text{CDCl}_3$ )

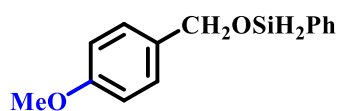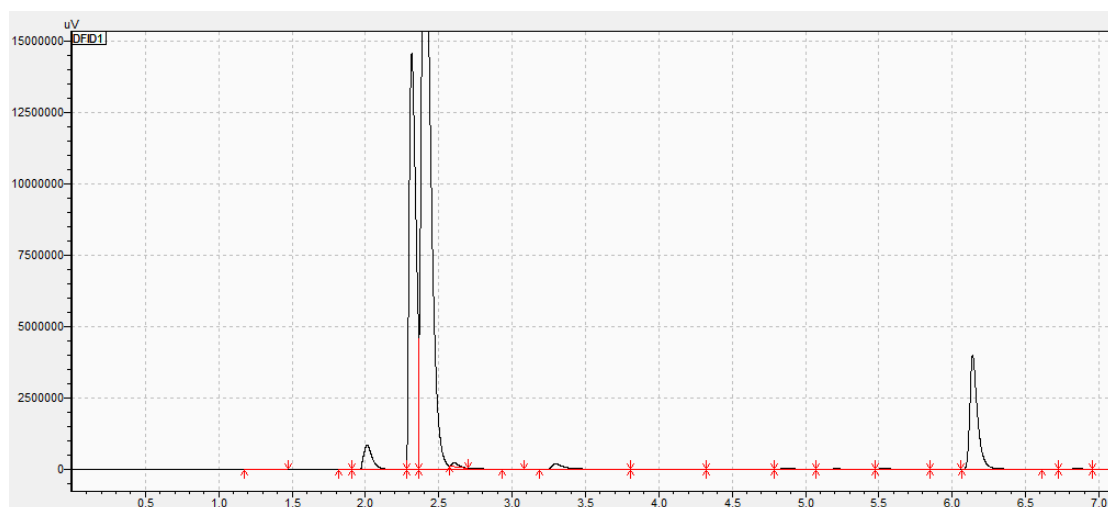

Fig.S51 GC spectrum of **6i**

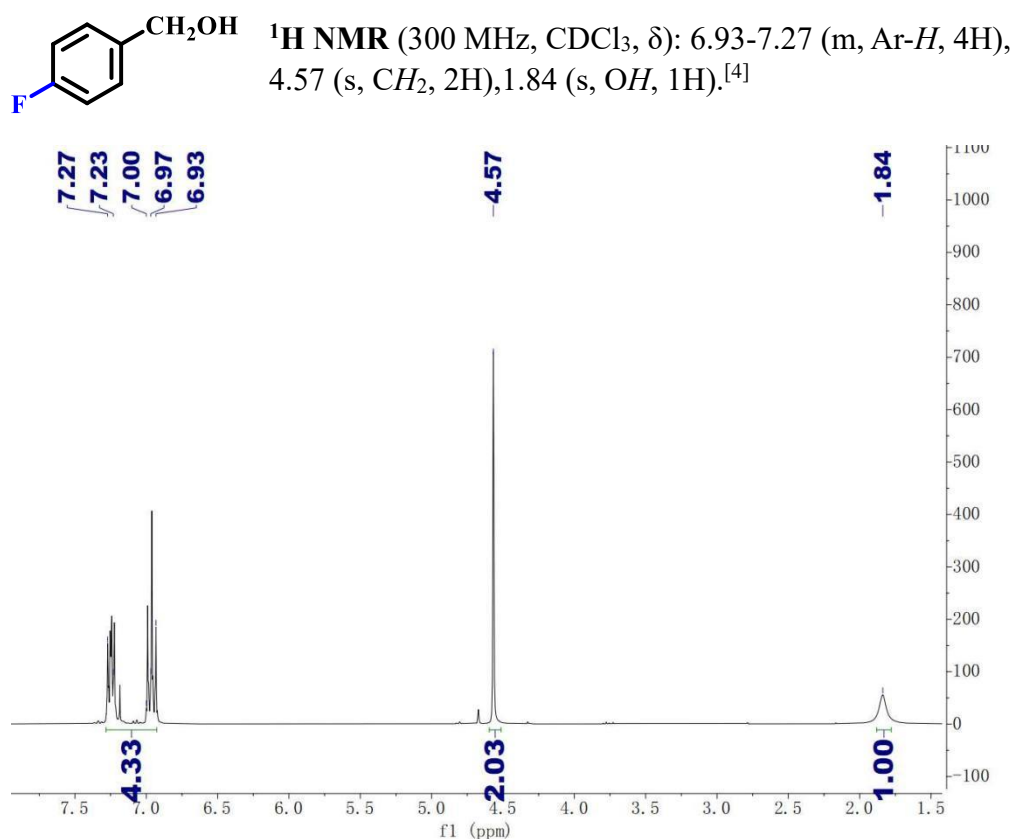

Fig.S52  $^1\text{H NMR}$  spectrum of **6j** ( $\text{CDCl}_3$ )

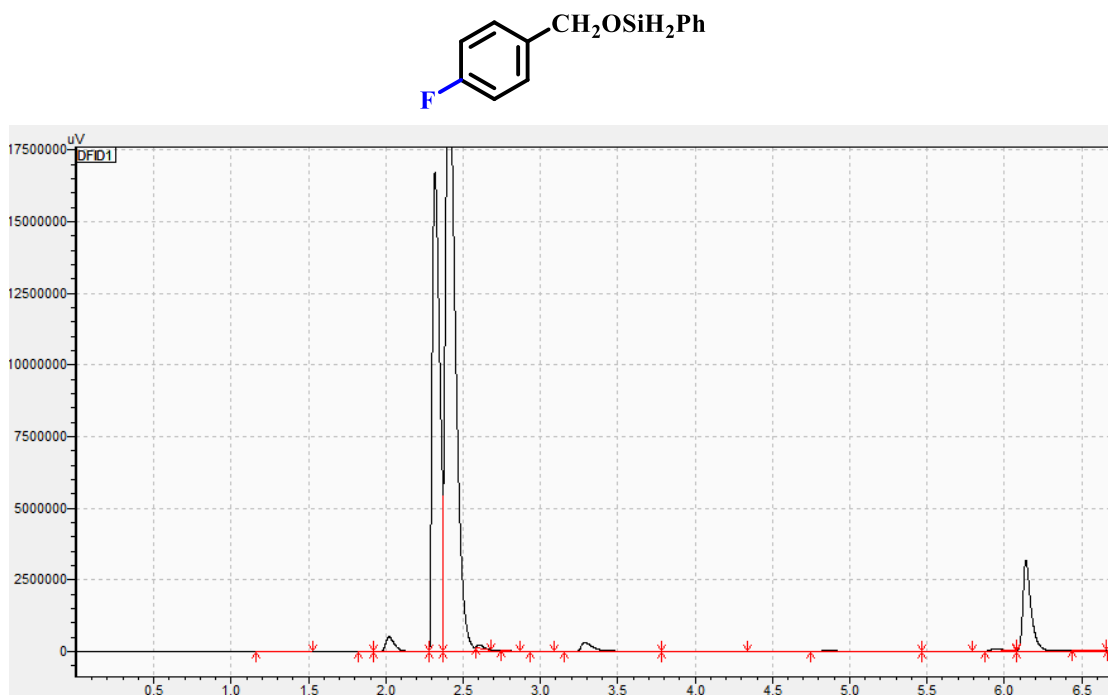

Fig.S53 GC spectrum of **6j**

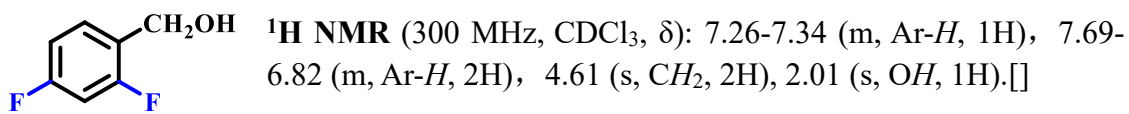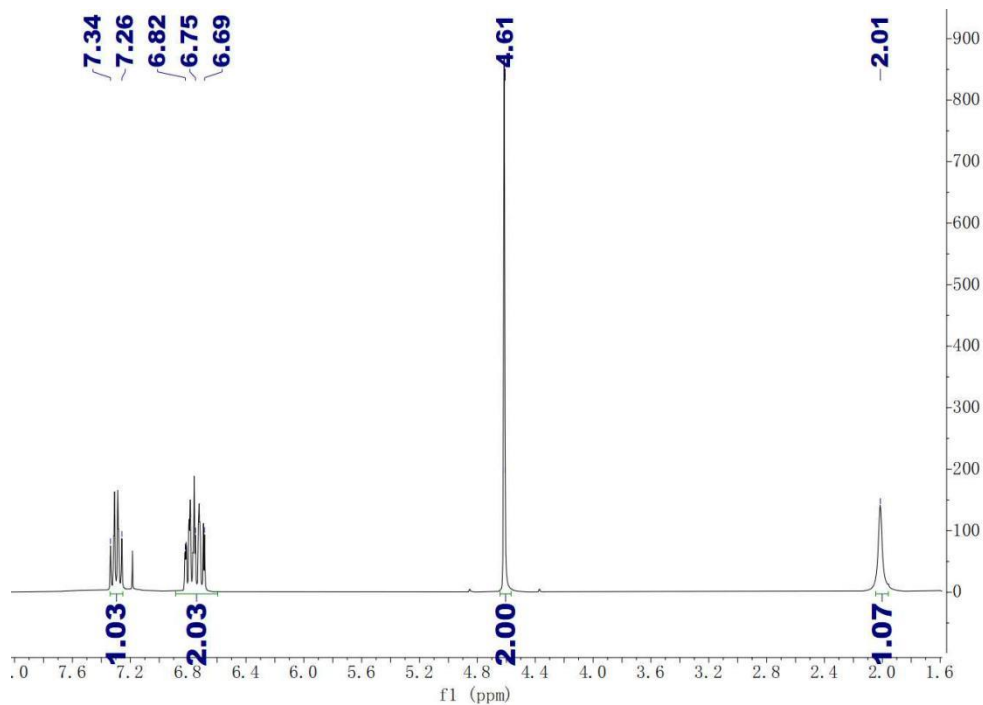

Fig.S54  $^1\text{H NMR}$  spectrum of **6k** ( $\text{CDCl}_3$ )

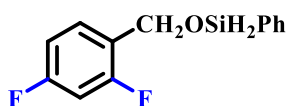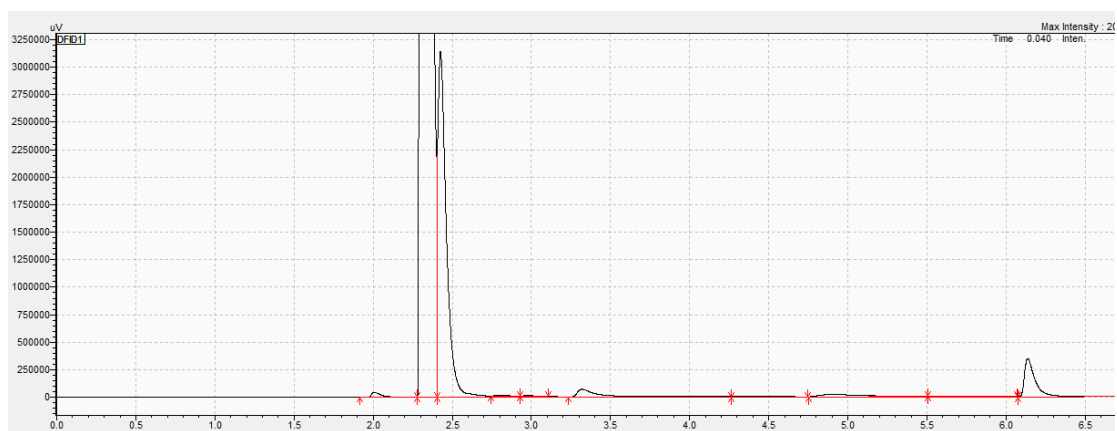

Fig.S55 GC spectrum of **6k**

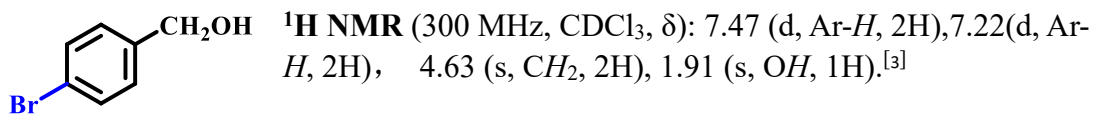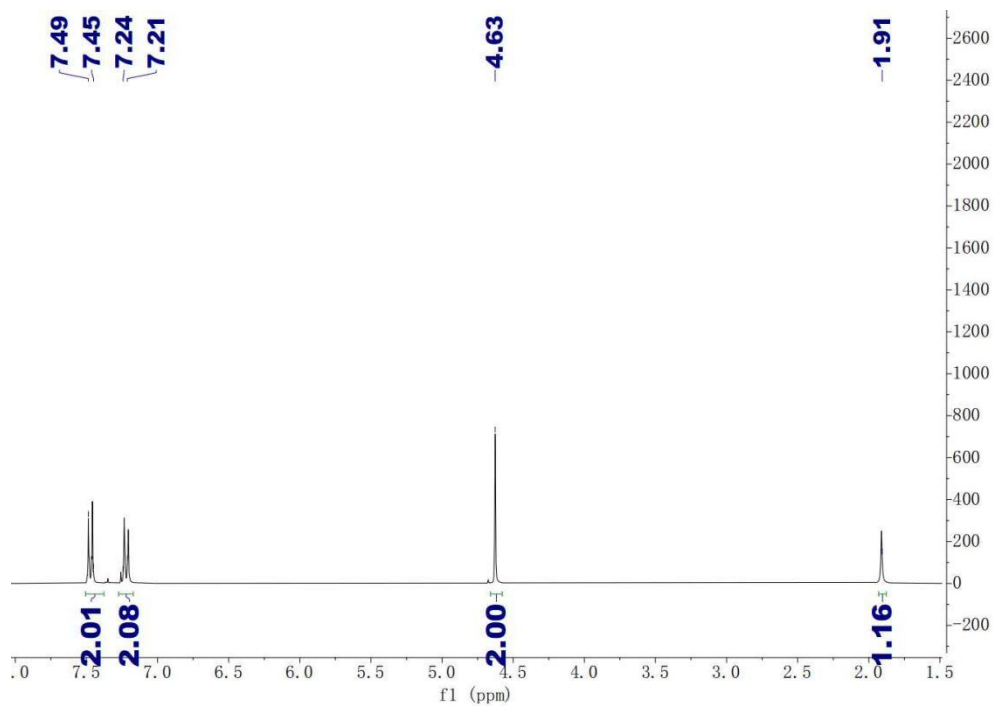

Fig.S56  $^1\text{H NMR}$  spectrum of **6l** ( $\text{CDCl}_3$ )

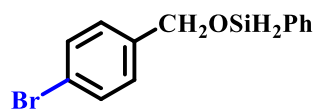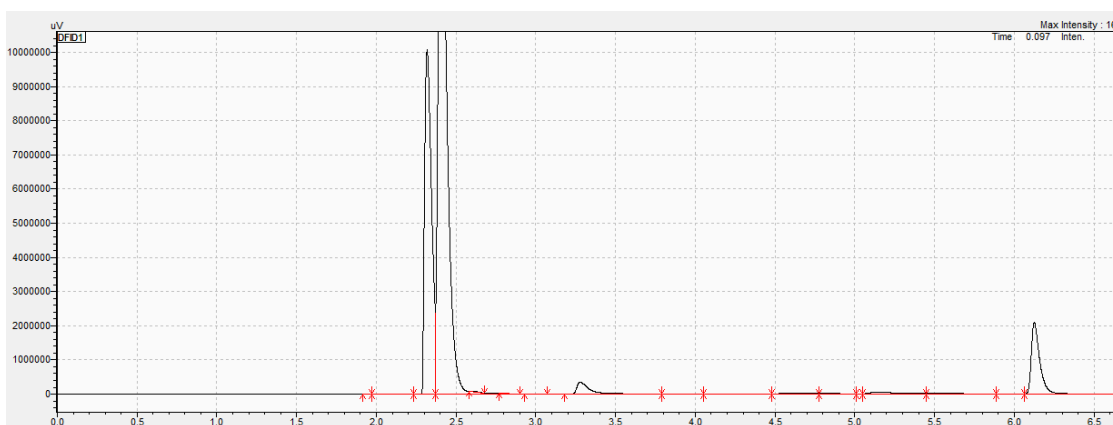

Fig.S57 GC spectrum of **6l**

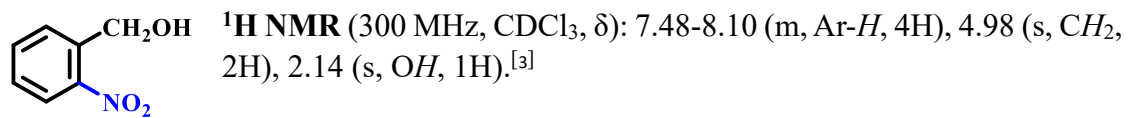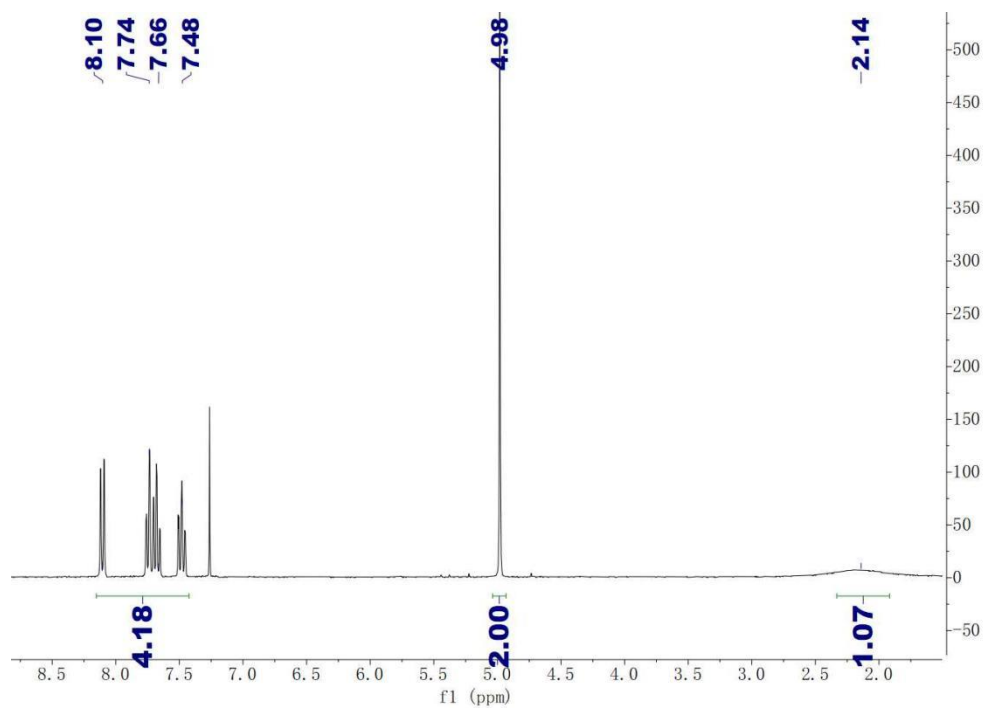

Fig.S58  $^1\text{H NMR}$  spectrum of **6m** ( $\text{CDCl}_3$ )

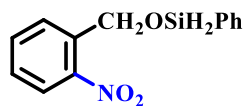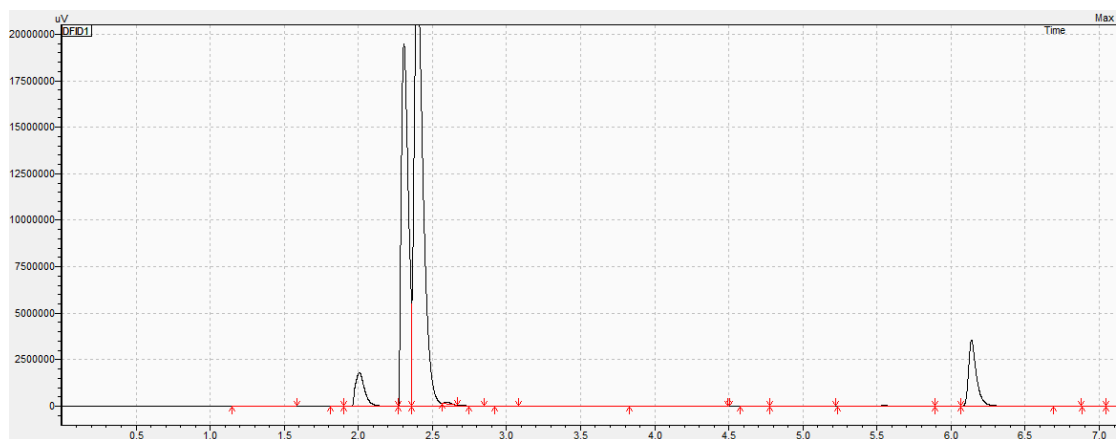

Fig.S59 GC spectrum of **6m**



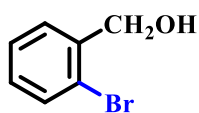

$^1\text{H NMR}$  (300 MHz,  $\text{CDCl}_3$ ,  $\delta$ ): 7.14-7.56 (m, Ar-H, 4H), 4.75 (s,  $\text{CH}_2$ , 2H), 1.83 (s, OH, 1H).<sup>[1]</sup>

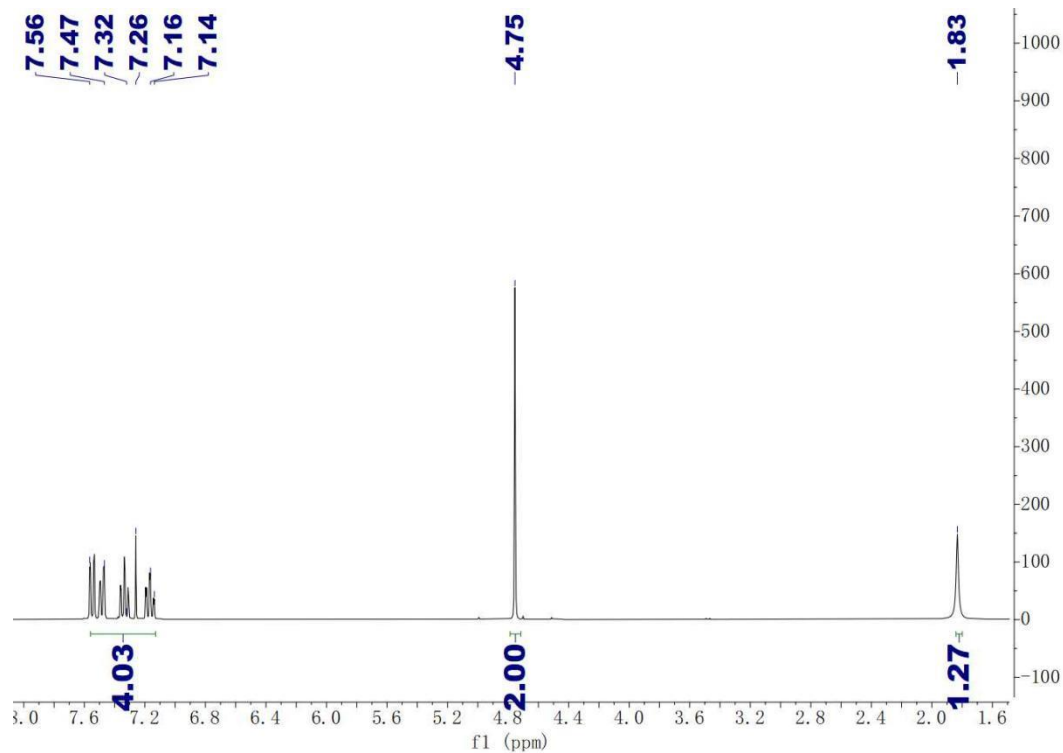

Fig.S60  $^1\text{H NMR}$  spectrum of **6n** ( $\text{CDCl}_3$ )

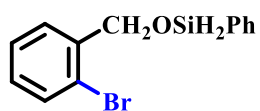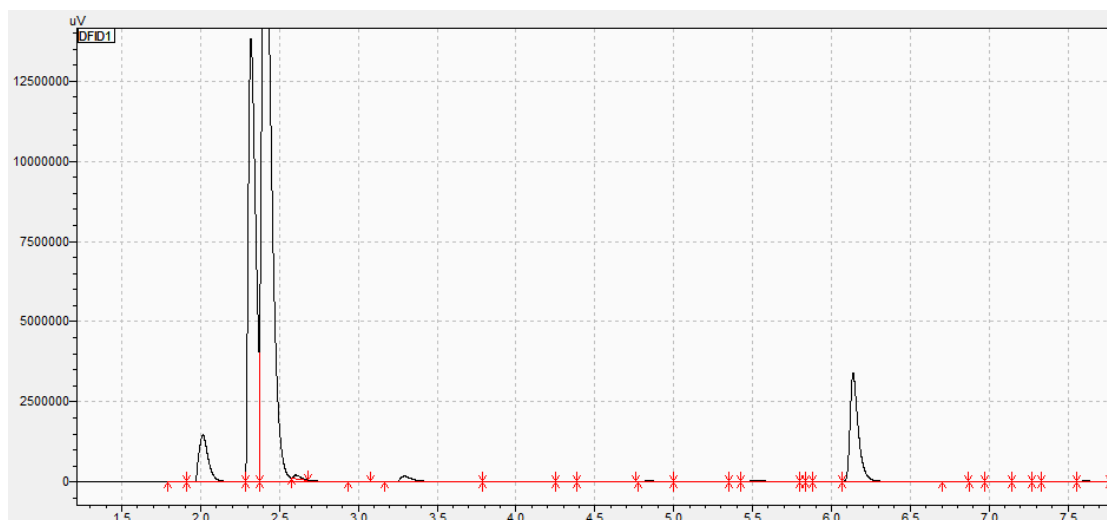

Fig.S61 GC spectrum of **6n**

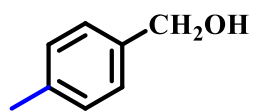

$^1\text{H NMR}$  (300 MHz,  $\text{CDCl}_3$ ,  $\delta$ ): 7.25 (d, Ar-H, 2H), 7.16 (d, Ar-H, 2H), 4.63 (s,  $\text{CH}_2$ , 2H), 2.35 (s,  $\text{CH}_3$ , 3H), 1.69 (s, OH, 1H).<sup>[3]</sup>

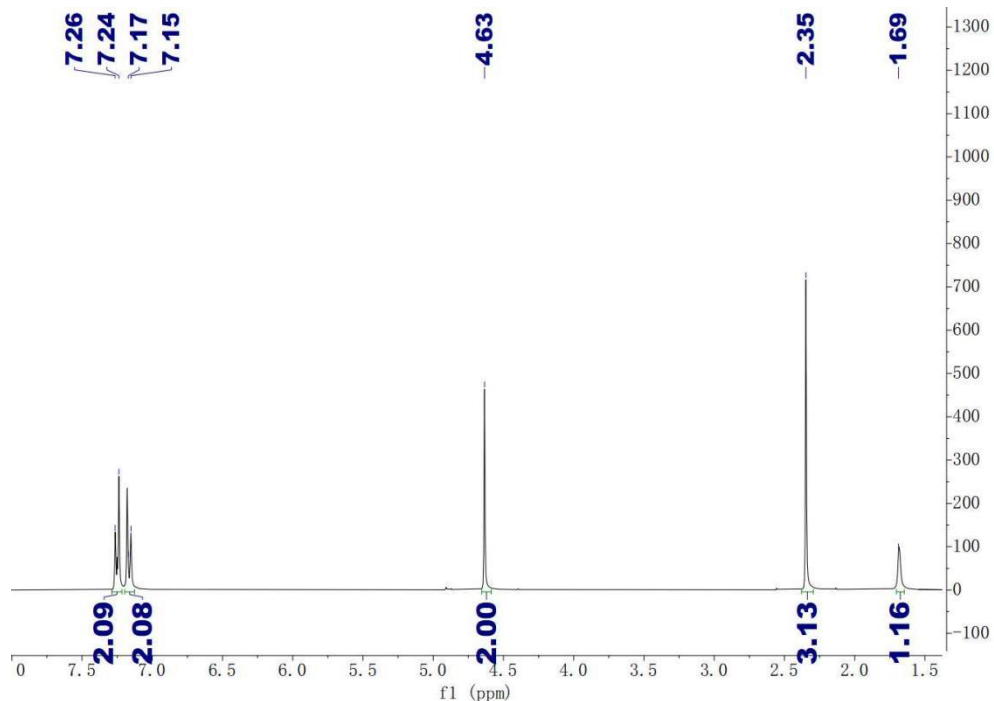

Fig.S62  $^1\text{H NMR}$  spectrum of **60** ( $\text{CDCl}_3$ )

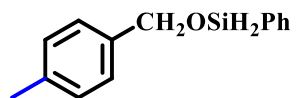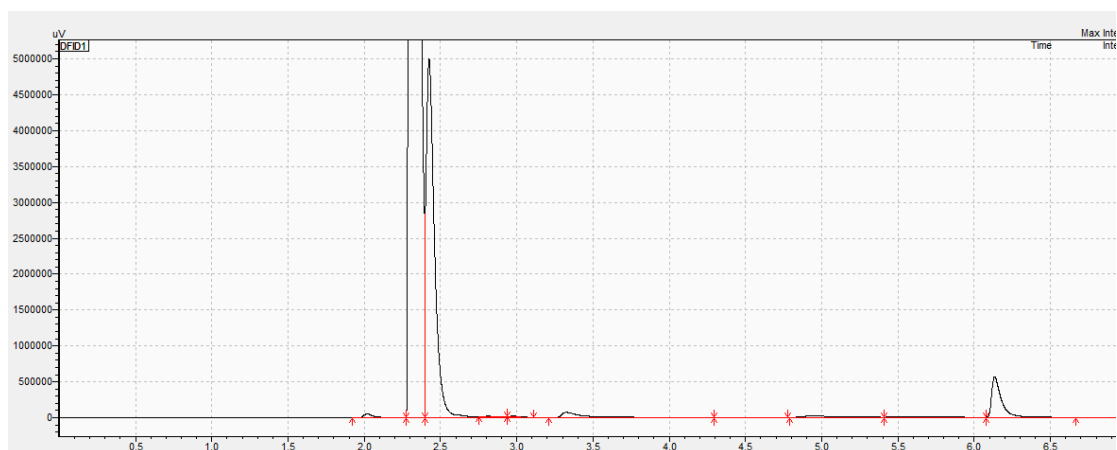

Fig.S63 GC spectrum of **60**

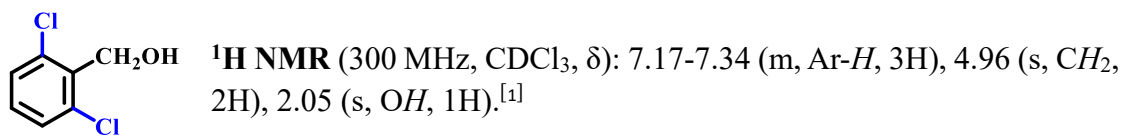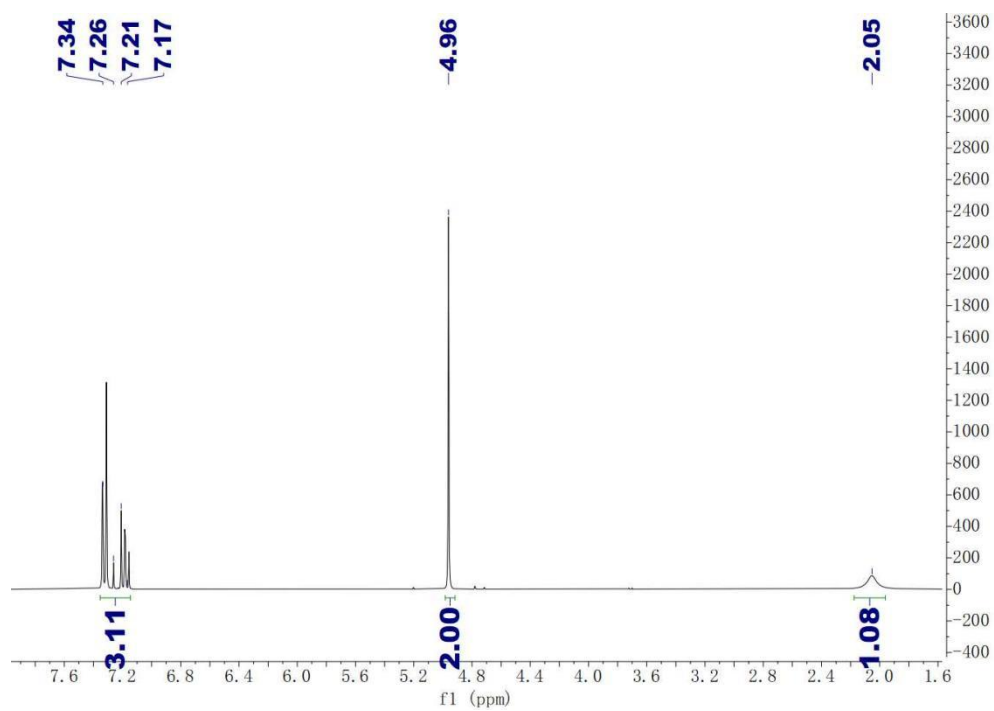

Fig.S64  $^1\text{H NMR}$  spectrum of **6p** ( $\text{CDCl}_3$ )

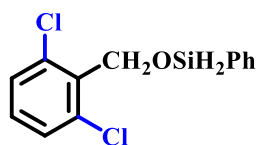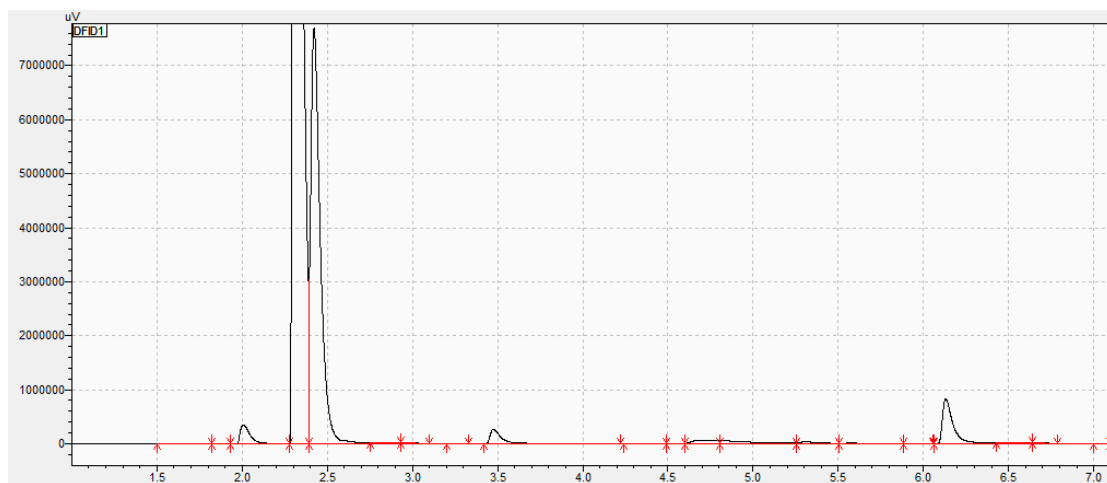

Fig.S65 GC spectrum of **6p**

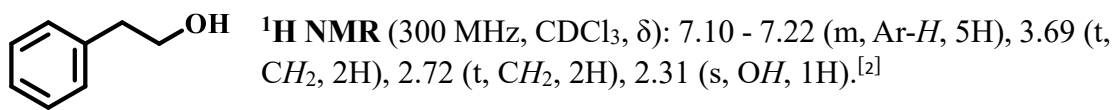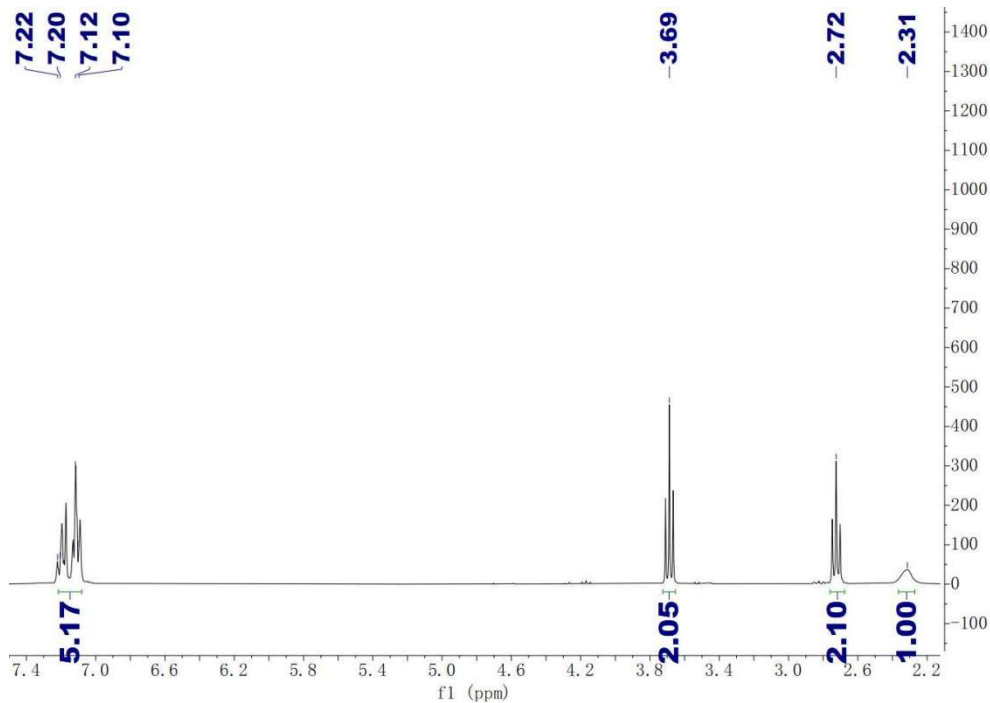

Fig.S66  $^1\text{H}$  NMR spectrum of **6q** ( $\text{CDCl}_3$ )

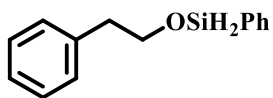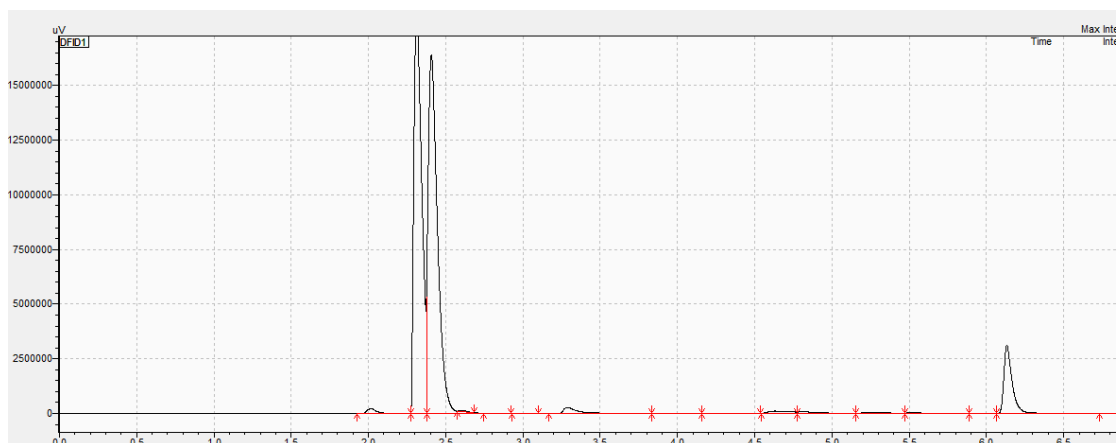

Fig.S67 GC spectrum of **6q**

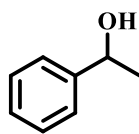

$^1\text{H NMR}$  (300 MHz,  $\text{CDCl}_3$ ,  $\delta$ ): 7.17-7.27 (m, Ar-H, 5H), 4.78 (q, CH, 1H), 2.06 (s, OH, 1H), 1.40 (d,  $\text{CH}_3$ , 3H).<sup>[1]</sup>

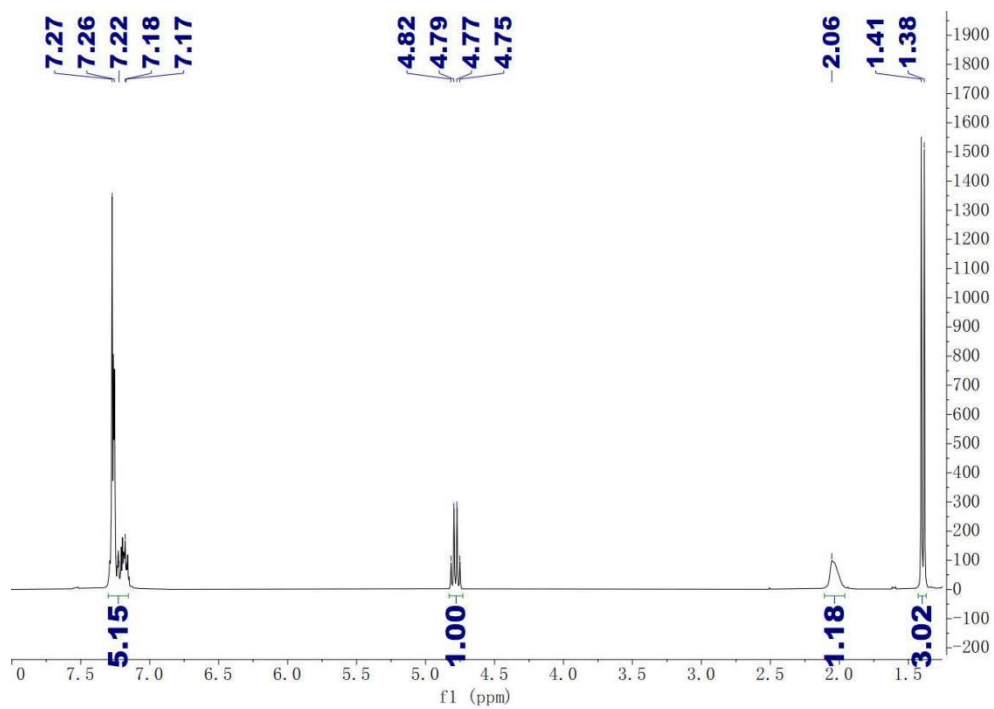

Fig.S68  $^1\text{H NMR}$  spectrum of **7a** ( $\text{CDCl}_3$ )

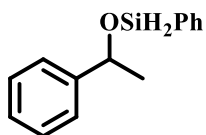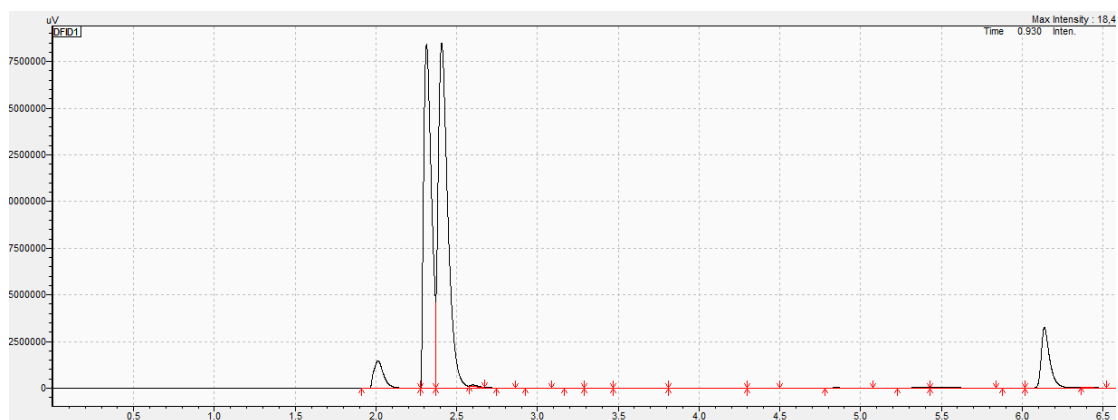

Fig.S69 GC spectrum of **7a**

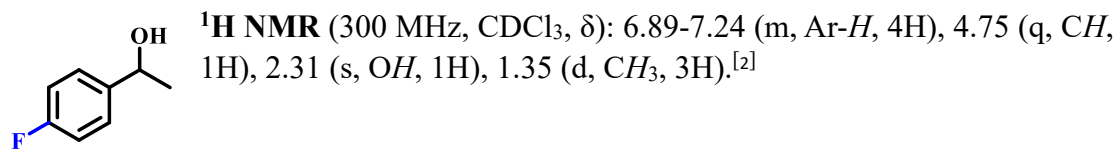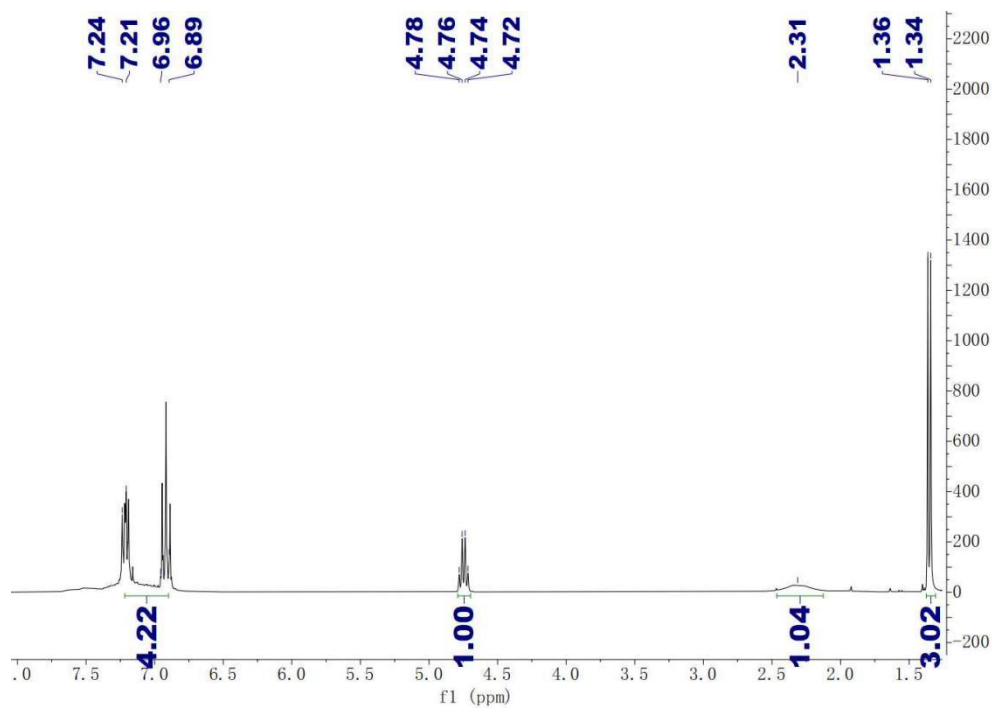

Fig.S70  $^1\text{H NMR}$  spectrum of **7b** ( $\text{CDCl}_3$ )

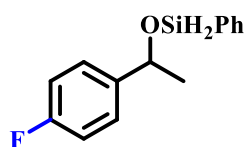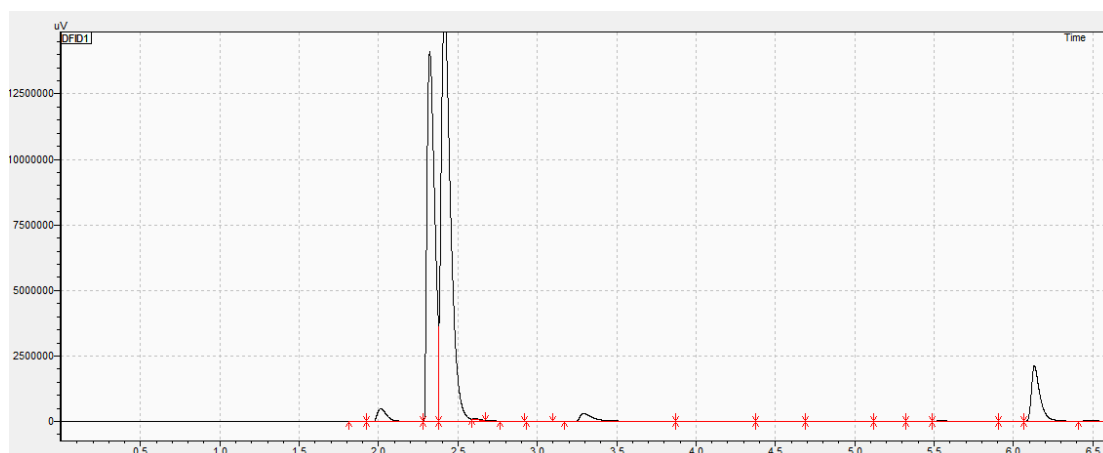

Fig.S71 GC spectrum of **7b**

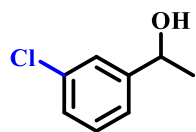

$^1\text{H NMR}$  (300 MHz,  $\text{CDCl}_3$ ,  $\delta$ ): 7.27 (s, Ar-H, 1H), 7.14-7.19 (m, Ar-H, 3H), 4.76 (q, CH, 1H), 2.12 (s, OH, 1H), 1.38 (d,  $\text{CH}_3$ , 3H).<sup>[1]</sup>

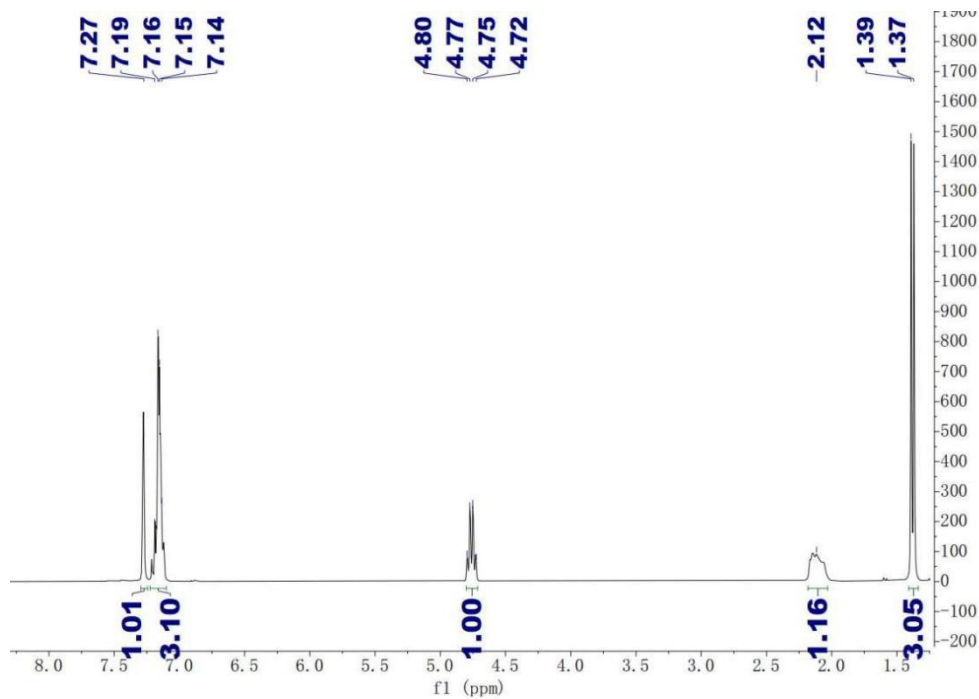

Fig.S72  $^1\text{H NMR}$  spectrum of **7c** ( $\text{CDCl}_3$ )

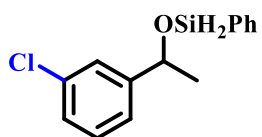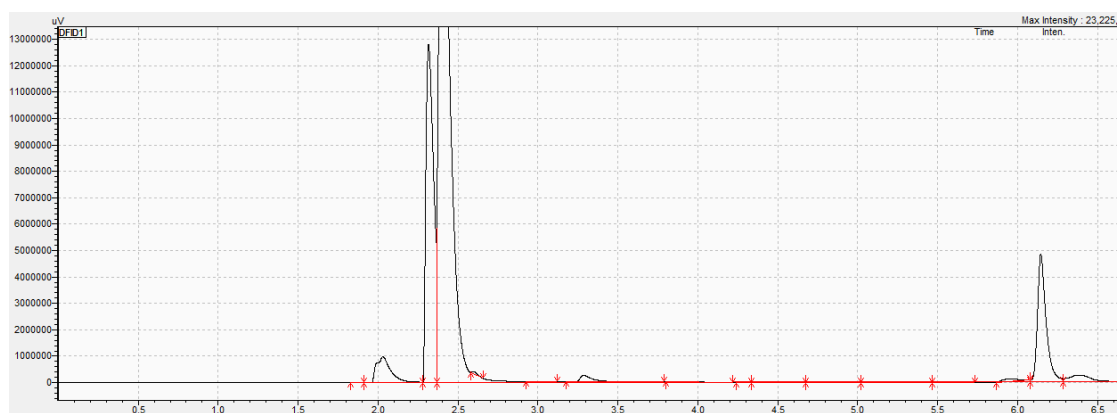

Fig.S73 GC spectrum of **7c**

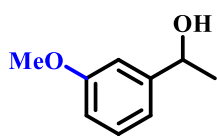

$^1\text{H NMR}$  (300 MHz,  $\text{CDCl}_3$ ,  $\delta$ ): 6.71-7.20 (m, Ar-H, 4H), 4.76 (q, CH, 1H), 3.72 (d,  $\text{OCH}_3$ , 3H), 2.02 (s, OH, 1H), 1.39 (d,  $\text{CH}_3$ , 3H).<sup>[1]</sup>

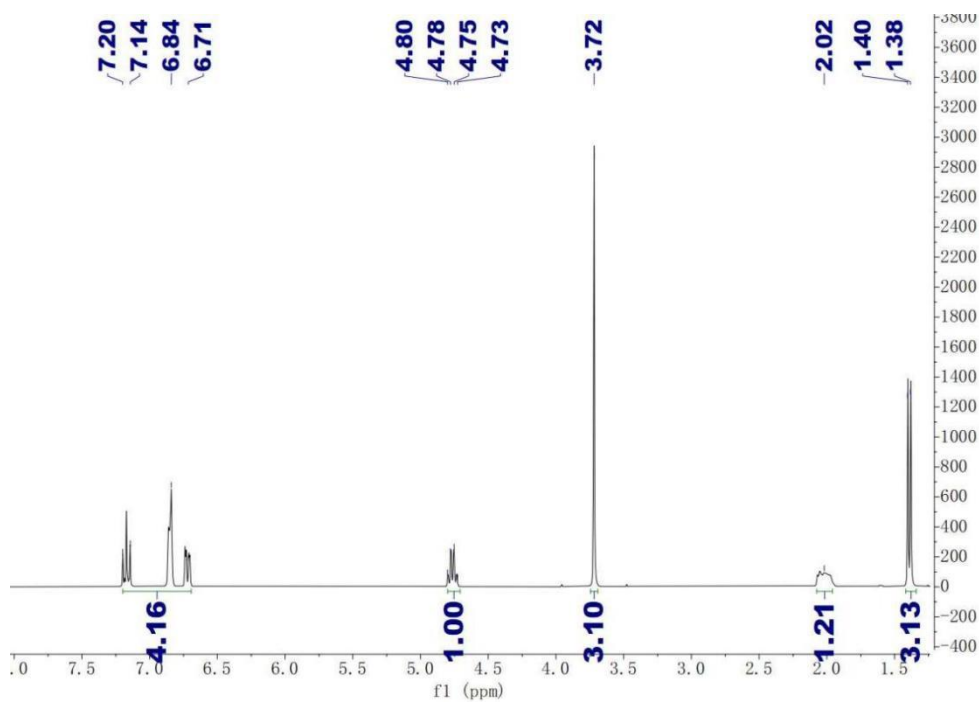

Fig.S74  $^1\text{H NMR}$  spectrum of **7d** ( $\text{CDCl}_3$ )

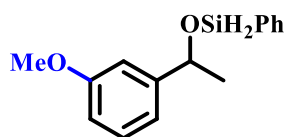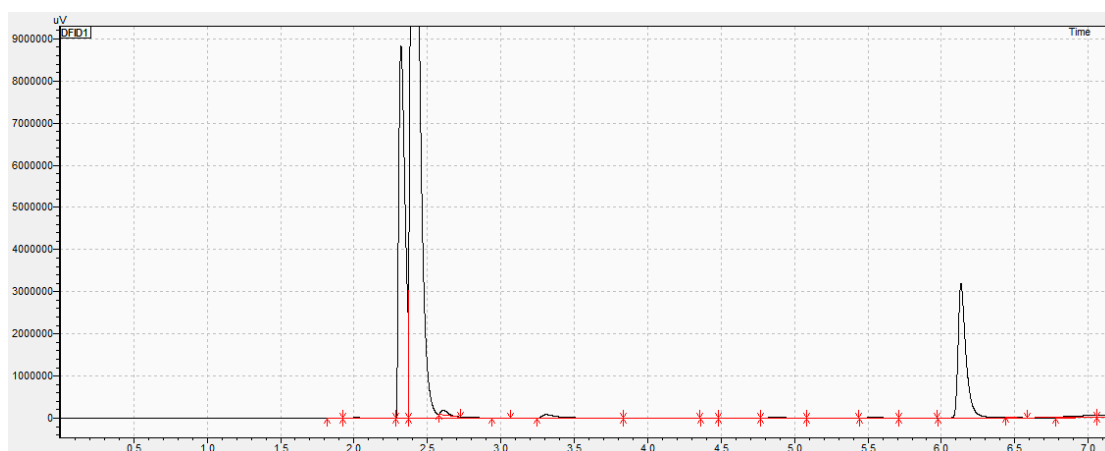

Fig.S75 GC spectrum of **7d**



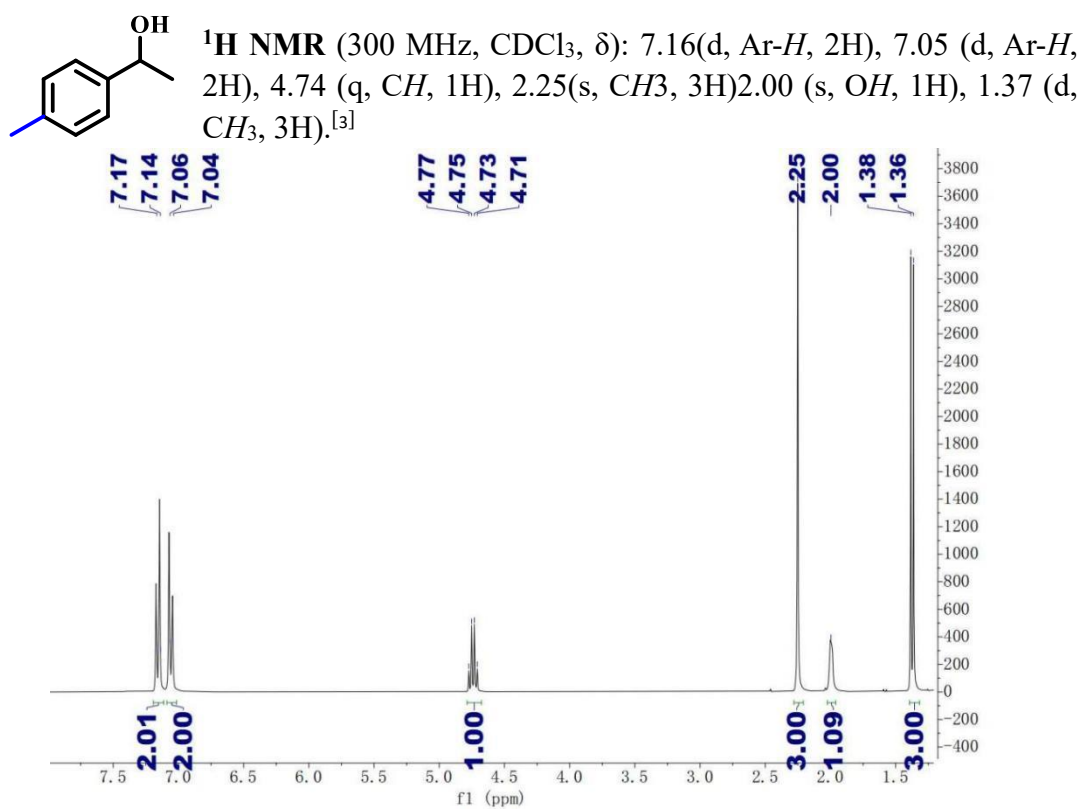

Fig.S76 <sup>1</sup>H NMR spectrum of 7e (CDCl<sub>3</sub>)

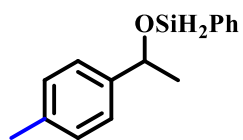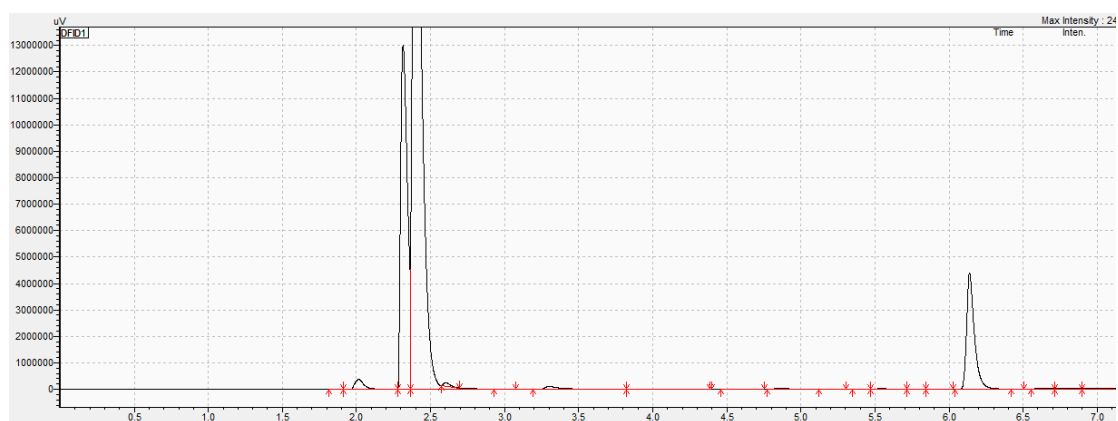

Fig.S77 GC spectrum of 7e

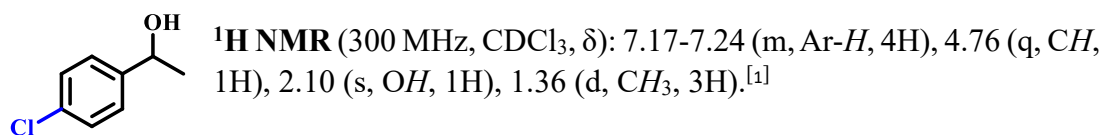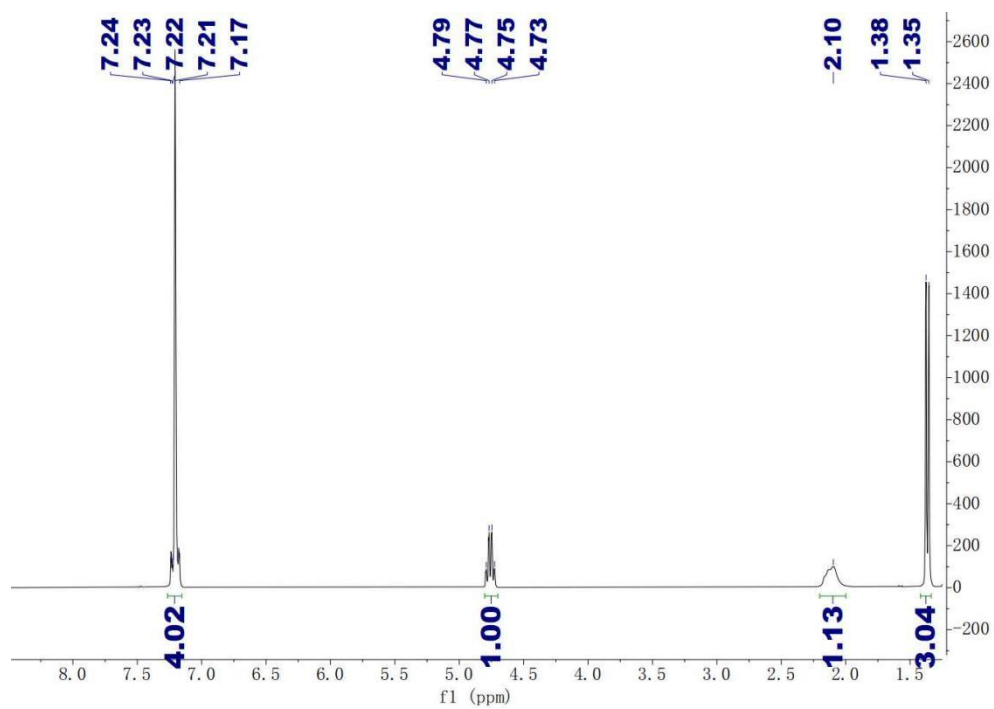

Fig.S78 <sup>1</sup>H NMR spectrum of **7f** (CDCl<sub>3</sub>)

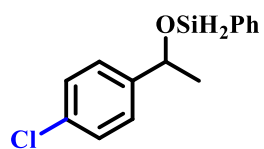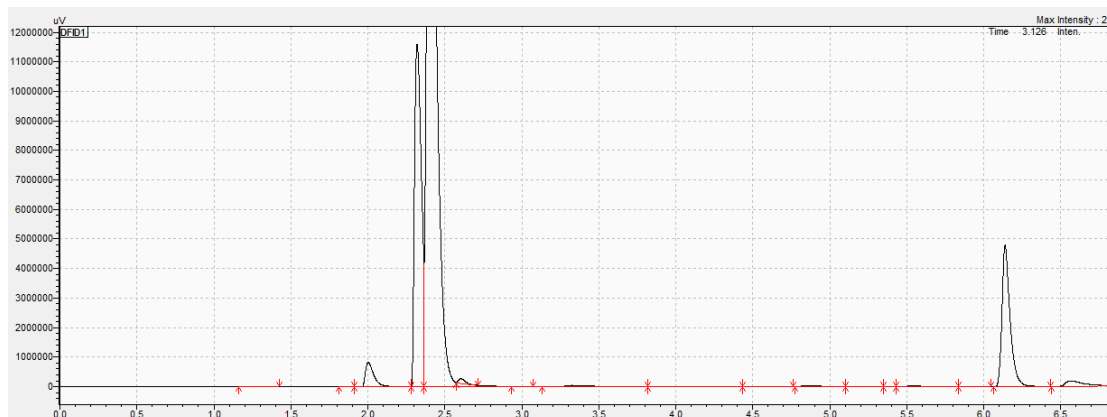

Fig.S79 GC spectrum of **7f**

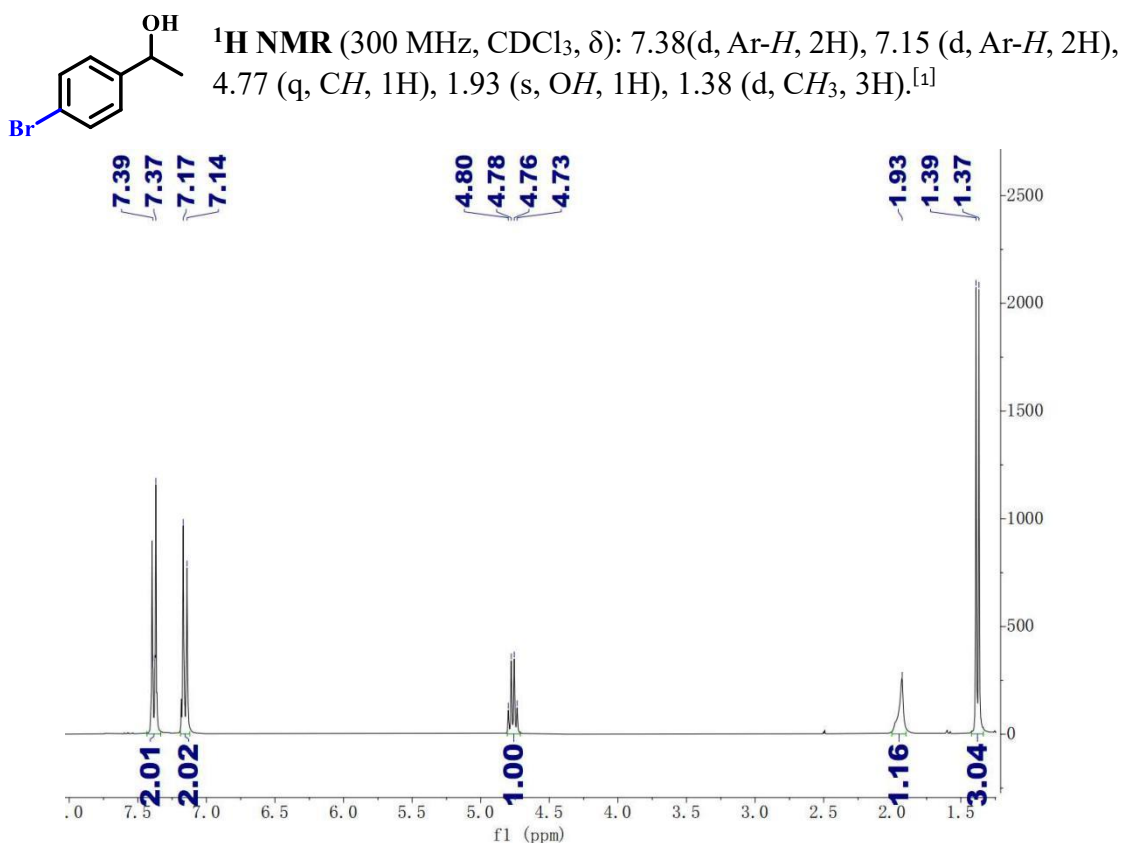

Fig.S80 <sup>1</sup>H NMR spectrum of **7g** (CDCl<sub>3</sub>)

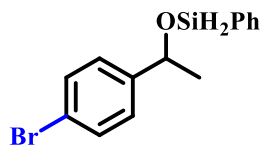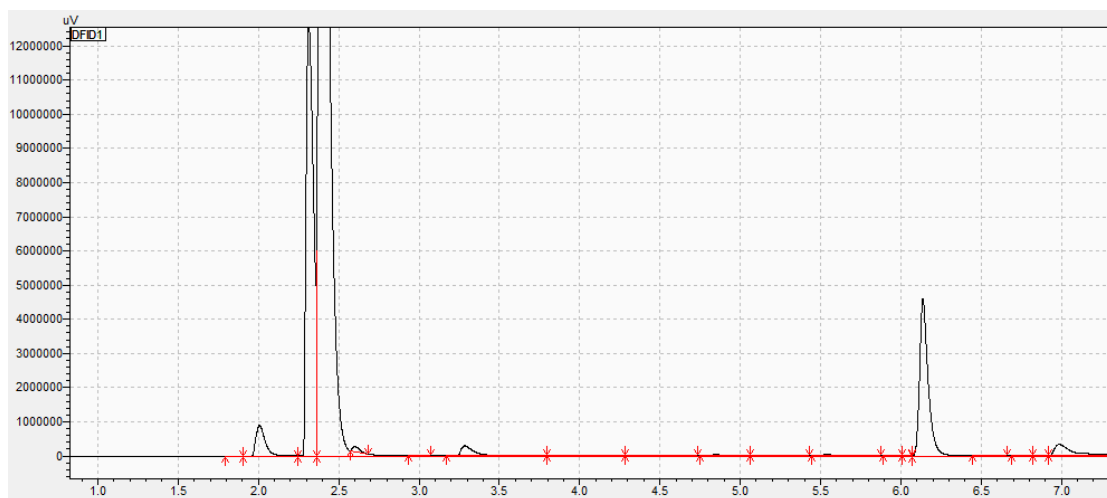

Fig.S81 GC spectrum of **7g**

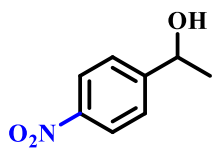

$^1\text{H NMR}$  (300 MHz,  $\text{CDCl}_3$ ,  $\delta$ ): 8.10(d, Ar-H, 2H), 7.46 (d, Ar-H, 2H), 4.93 (q, CH, 1H), 2.24 (s, OH, 1H), 1.43 (d,  $\text{CH}_3$ , 3H). [3]

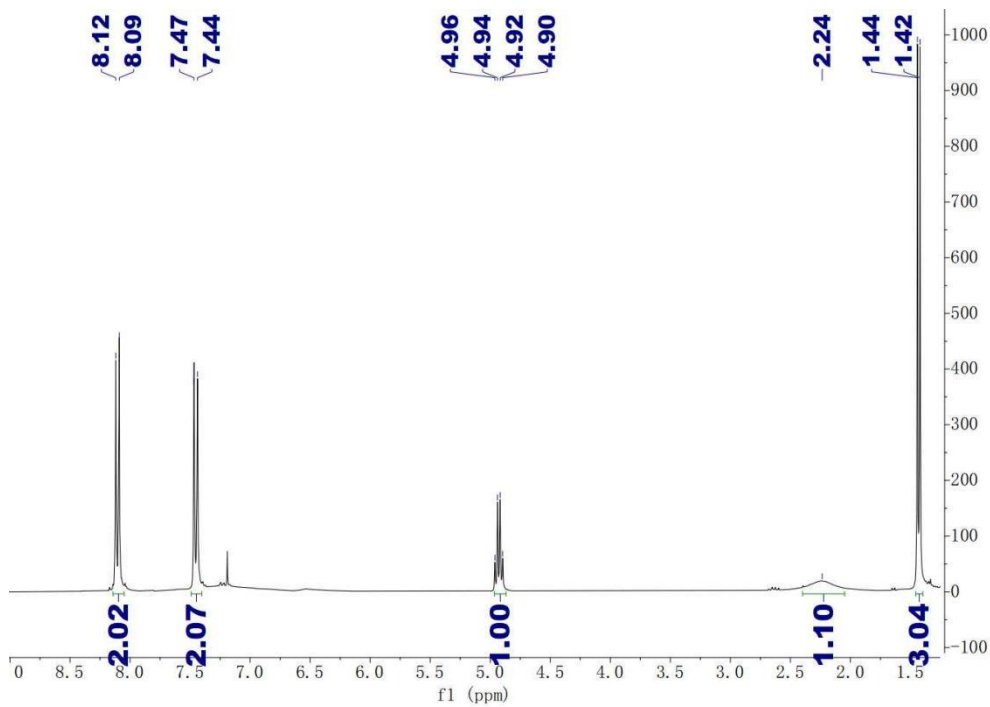

Fig.S82  $^1\text{H NMR}$  spectrum of **7h** ( $\text{CDCl}_3$ )

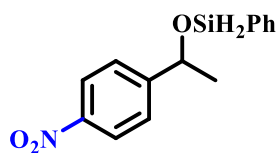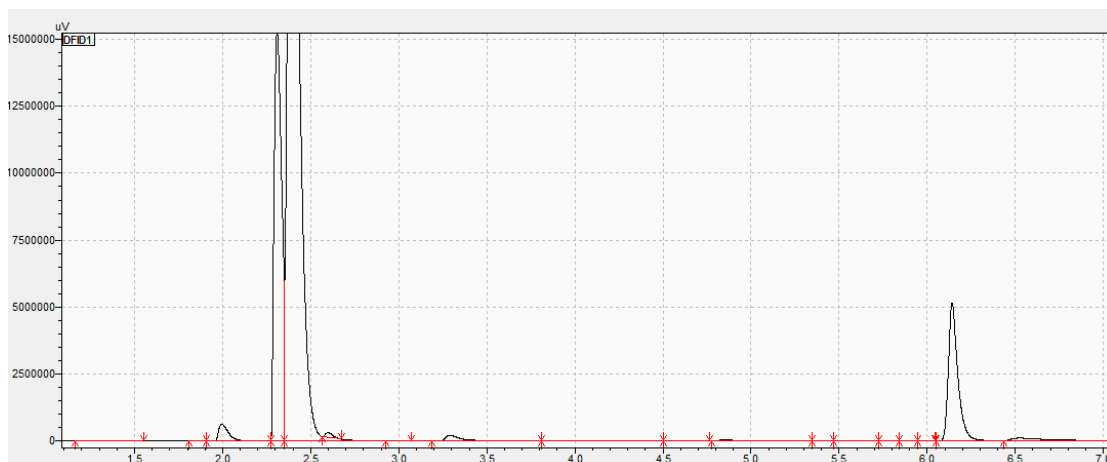

Fig.S83 GC spectrum of **7h**

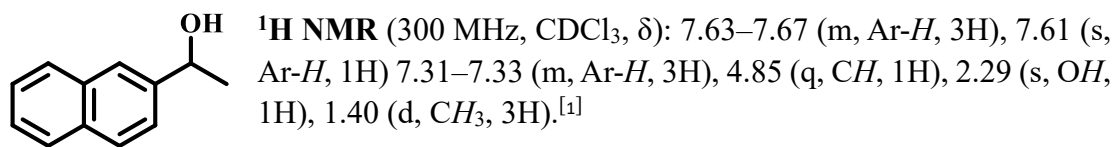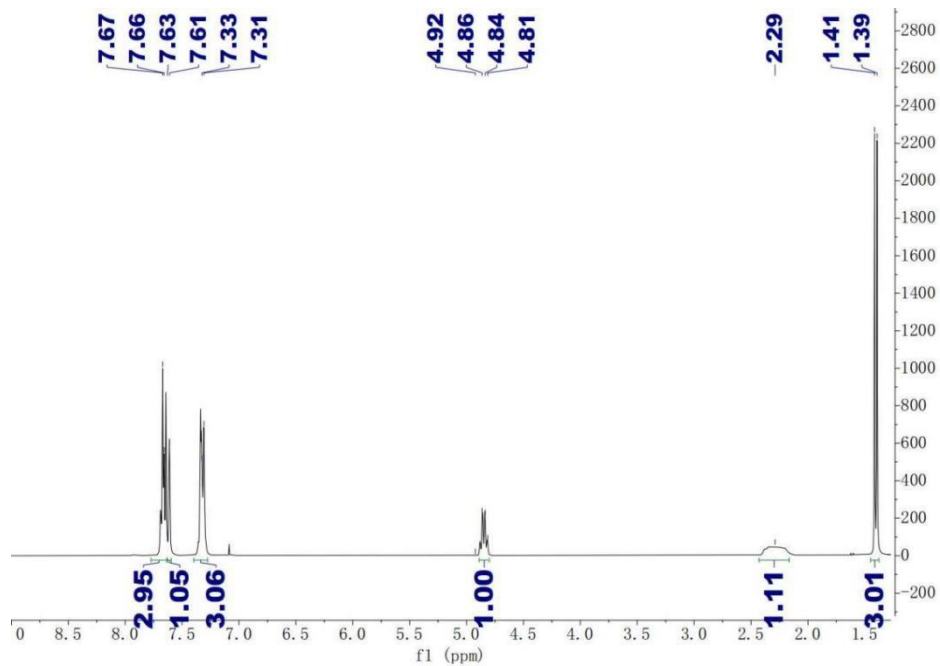

Fig.S84  $^1\text{H NMR}$  spectrum of **7i** ( $\text{CDCl}_3$ )

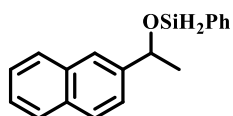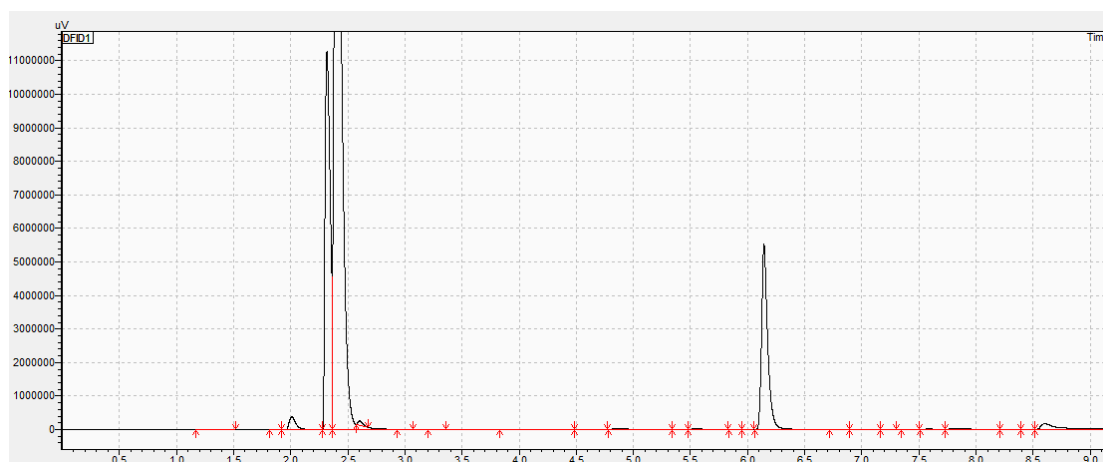

Fig.S85 GC spectrum of **7i**

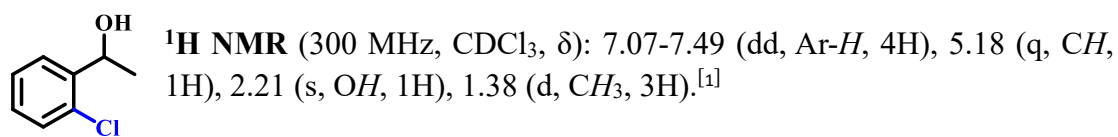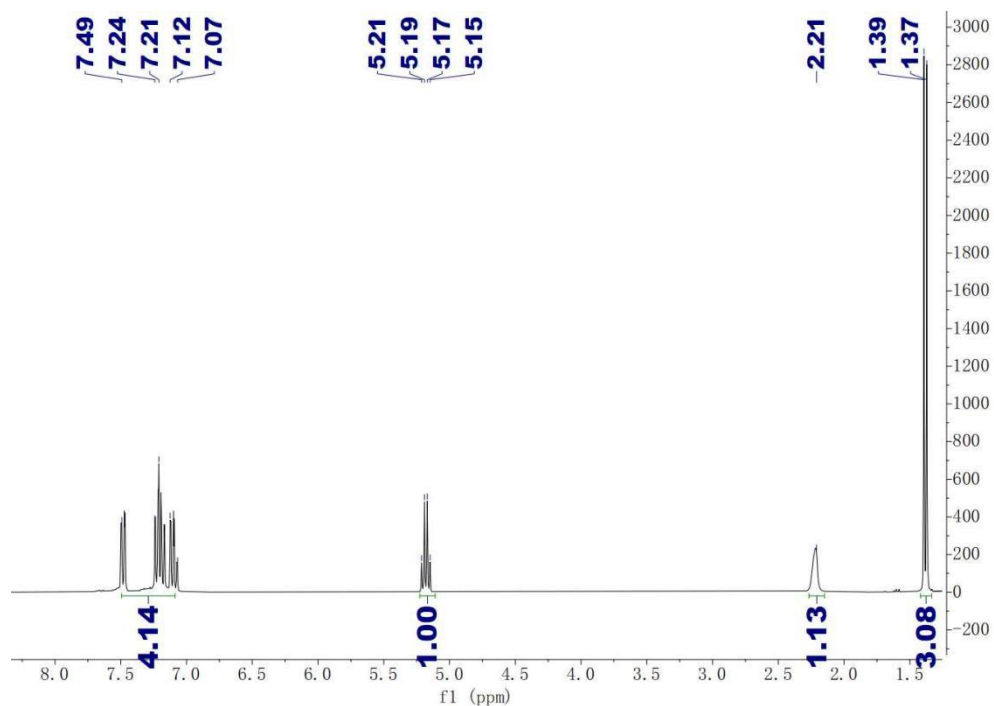

Fig.S86 <sup>1</sup>H NMR spectrum of 7j (CDCl<sub>3</sub>)

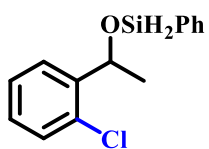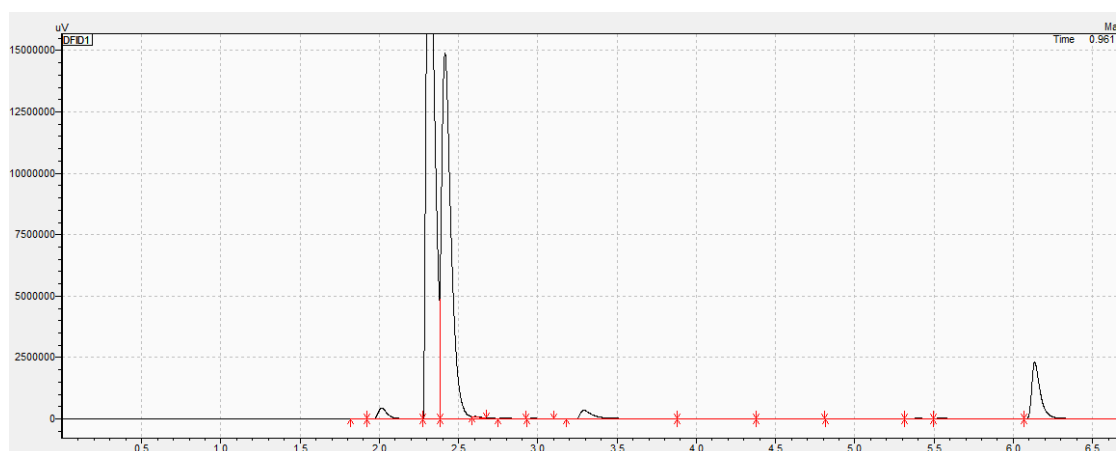

Fig.S87 GC spectrum of 7j

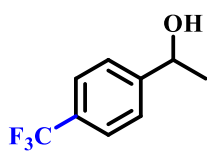

$^1\text{H NMR}$  (300 MHz,  $\text{CDCl}_3$ ,  $\delta$ ): 7.50(d, Ar-H, 2H), 7.37 (d, Ar-H, 2H), 4.84 (q, CH, 1H), 2.18 (s, OH, 1H), 1.39 (d,  $\text{CH}_3$ , 3H).<sup>[3]</sup>

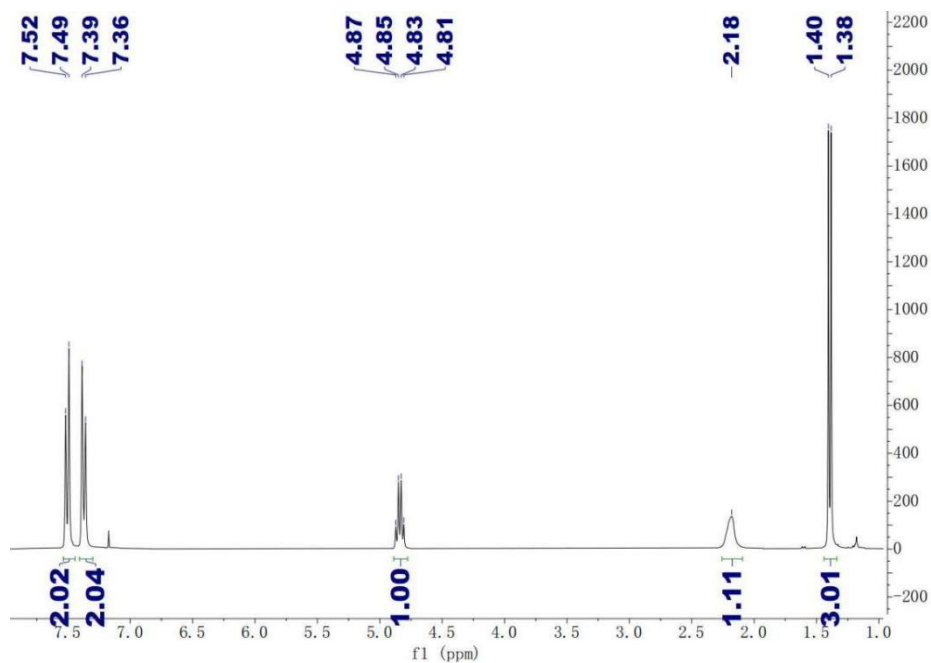

Fig.S88  $^1\text{H NMR}$  spectrum of **7k** ( $\text{CDCl}_3$ )

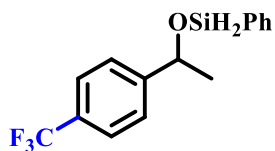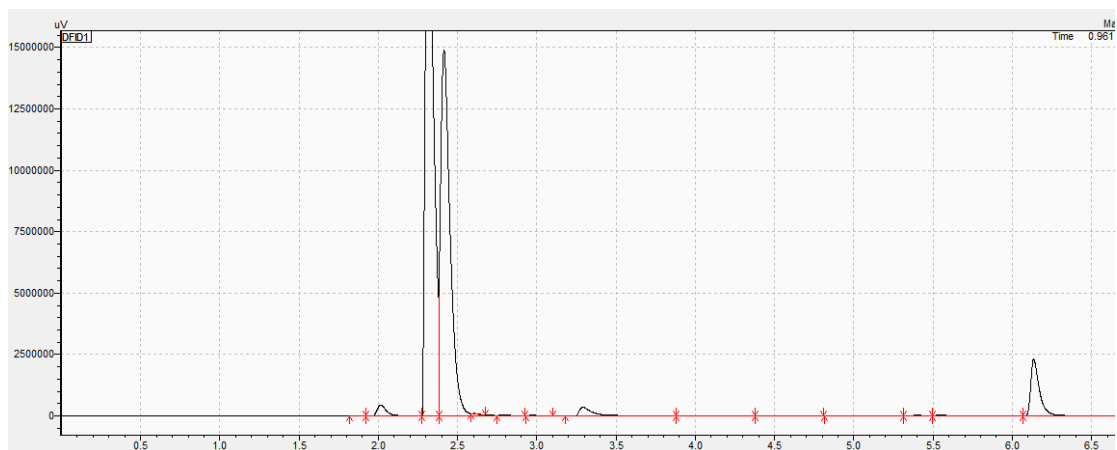

Fig.S89 GC spectrum of **7k**

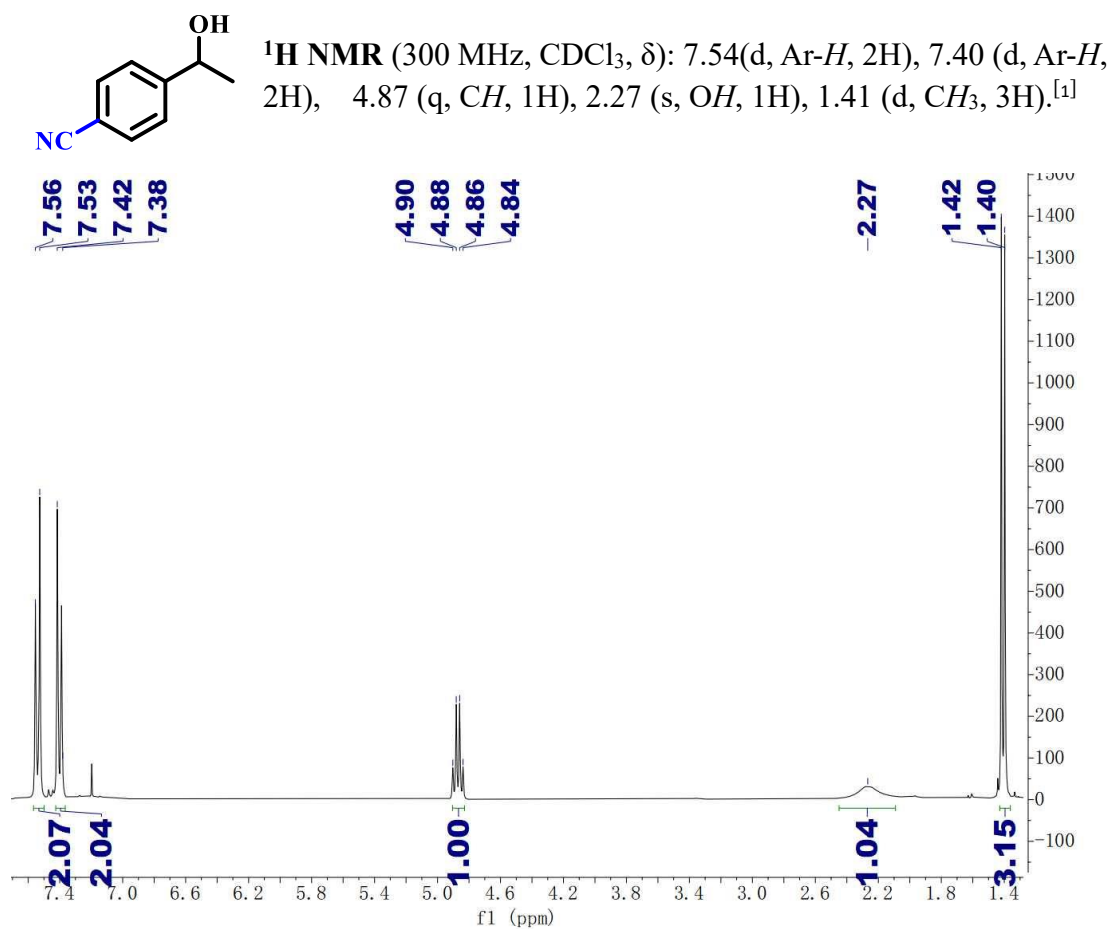

Fig.S90 <sup>1</sup>H NMR spectrum of 7I (CDCl<sub>3</sub>)

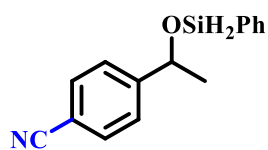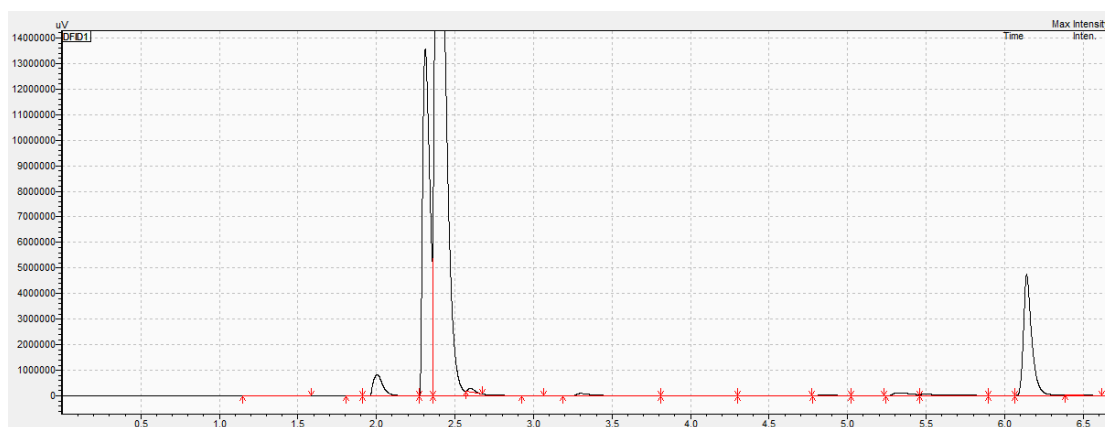



Fig.S91 GC spectrum of 7l

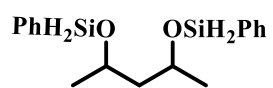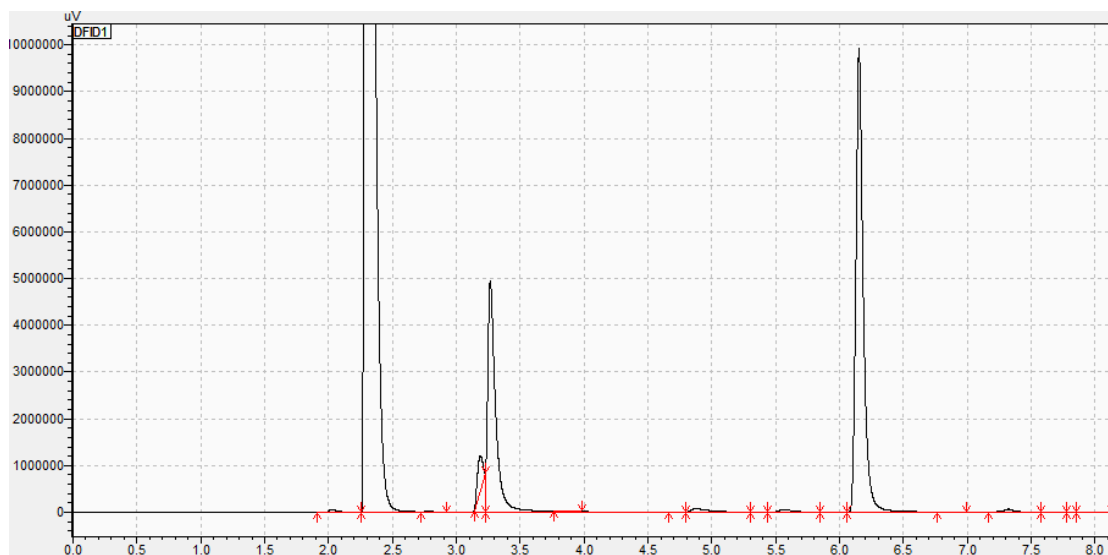

Fig.S92 GC spectrum of 7m

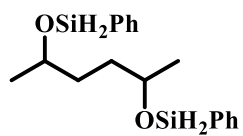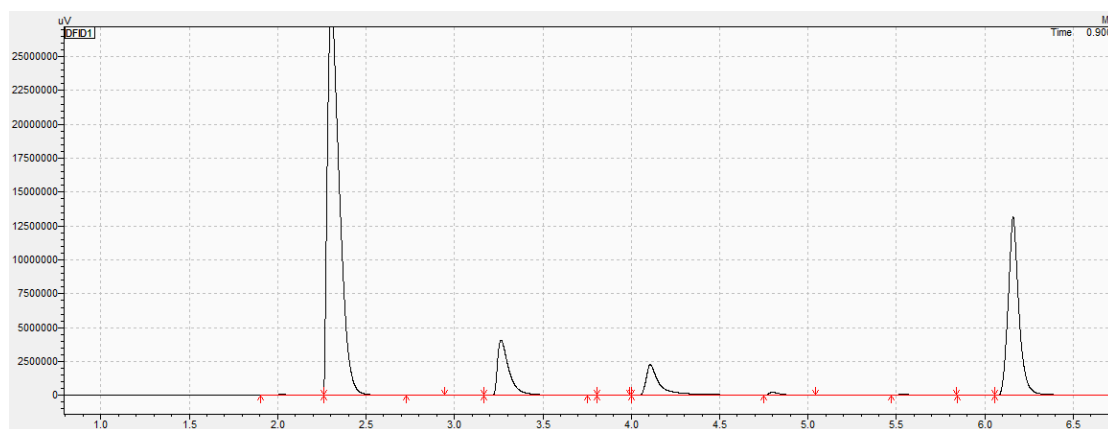

Fig.S93 GC spectrum of 7n

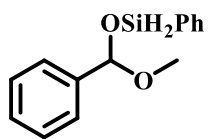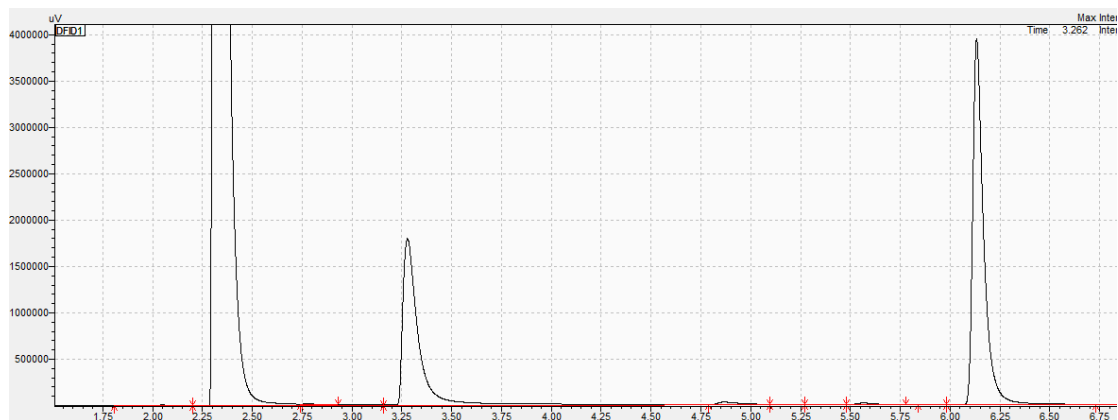

Fig.S94 GC spectrum of 7o

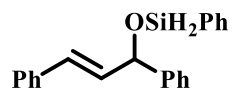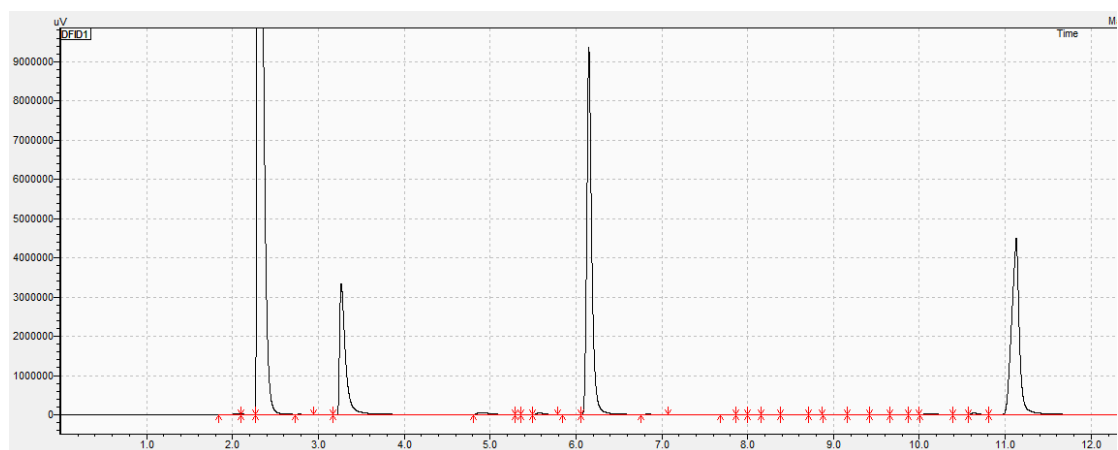

Fig.S95 GC spectrum of 7p

## SVI GC analysis of H<sub>2</sub>

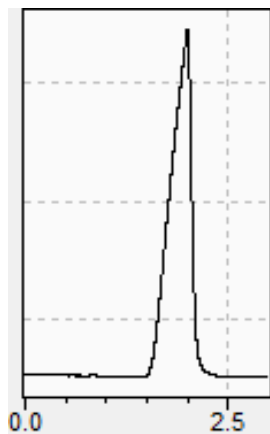

Fig.S96 The GC analysis that shows H<sub>2</sub>

## REFERENCES

- 
- [1] X. Du, X. Qi, K. Li, X. Li, H. Sun, O. Fuhr, D. Fenske, *Appl Organomet Chem.* **2021**, 35, e6286.
- [2] X. Qi, H. Zhao, H. Sun, X. Li, O. Fuhr, D. Fenske, *New J. Chem.*, **2018**, 42, 16583.

- 
- [3] R. Ghosh, N. Ch. Jana, S. Panda, B. Bagh, *ACS Sustainable Chem. Eng.* **2021**, 9, 4903.
- [4] C. L. Rock, T. L. Groy, R. J. Trovitch, *Dalton Trans.*, **2018**, 47, 8807
